# Supplementary material for: CRISPR-Cas9-mediated knockout of SPRY2 in human hepatocytes leads to increased glucose uptake and lipid droplet accumulation
Source: BMC Endocr Disord. 2019 Oct 29;19:115. doi: 10.1186/s12902-019-0442-8 (PMC6820957; doi:10.1186/s12902-019-0442-8)
Supplement: Supplementary file 2 — Additional file 2. Differential gene expression comparing HepG2 mock and SPRY2 KO cells. Separate tabs for complete list, significantly up- and downregulated transcripts. [file 12902_2019_442_MOESM2_ESM.xlsx]

## Sheet: 2x2 comparison
	id	baseMean	baseMeanA	baseMeanB	foldChange	log2FoldChange	pval	padj
1	SEC24B-AS1	5.14864	1.89434	8.40294	4.43582	2.1492	0.127628	0.805899
2	A1BG	218.728	123.199	314.256	2.55079	1.35095	1.41394e-07	4.27517e-05
3	A1CF	293.334	310.758	275.909	0.887858	-0.1716	0.49471	1
4	GGACT	3.60776	3.61934	3.59619	0.993603	-0.00925827	1	1
5	A2M	48533.8	44953.1	52114.5	1.15931	0.213265	0.224187	0.947502
6	A2ML1	0	0	0	NA	NA	NA	NA
7	A2MP1	0.496988	0.993977	0	0	#NAME?	0.764234	1
8	A4GALT	12.9716	12.6408	13.3023	1.05232	0.0735793	0.968026	1
9	A4GNT	0	0	0	NA	NA	NA	NA
10	AAAS	559.849	544.779	574.919	1.05532	0.077687	0.695739	1
11	AACS	548.78	529.463	568.097	1.07297	0.101606	0.651581	1
12	AADAC	60.6687	73.8392	47.4981	0.643263	-0.636519	0.0794477	0.680502
13	AADACL2	0	0	0	NA	NA	NA	NA
14	AADACL3	0	0	0	NA	NA	NA	NA
15	AADACL4	0	0	0	NA	NA	NA	NA
16	AADAT	103.346	101.613	105.08	1.03412	0.0484001	0.870088	1
17	AAGAB	440.905	473.569	408.241	0.862052	-0.214154	0.333651	1
18	AAK1	17.8573	16.5231	19.1915	1.16149	0.21598	0.814331	1
19	AAMP	1605.63	1542.3	1668.95	1.08212	0.11386	0.547124	1
20	AANAT	0	0	0	NA	NA	NA	NA
21	AARS	2016.93	2218.44	1815.43	0.818333	-0.28924	0.140656	0.830938
22	AARS2	205.739	187.901	223.576	1.18985	0.250786	0.319846	1
23	PTGES3L-AARSD1	18.9954	24.4571	13.5337	0.553367	-0.853691	0.175788	0.878131
24	AASDH	29.5767	25.2817	33.8718	1.33977	0.42199	0.465103	1
25	AASDHPPT	828.642	747.804	909.481	1.2162	0.282384	0.156665	0.857343
26	AASS	55.1228	55.2882	54.9574	0.994017	-0.00865808	1	1
27	AATF	1635.08	1799.79	1470.37	0.81697	-0.291645	0.113656	0.779173
28	AATK	68.5736	74.9048	62.2424	0.830953	-0.267161	0.494567	1
29	ABAT	6077.66	6943.6	5211.71	0.750577	-0.413927	0.021707	0.359139
30	ABCA1	627.046	589.999	664.094	1.12558	0.170673	0.34743	1
31	ABCA10	2.71003	5.42006	0	0	#NAME?	0.0499908	0.558192
32	ABCA12	7.27602	7.22079	7.33126	1.0153	0.0219043	1	1
33	ABCA13	0	0	0	NA	NA	NA	NA
34	ABCA17P	0	0	0	NA	NA	NA	NA
35	ABCA2	300.745	257.774	343.716	1.3334	0.41511	0.0598245	0.60775
36	ABCA3	61.7755	47.0735	76.4775	1.62464	0.700121	0.0566	0.593681
37	ABCA4	0.526968	0	1.05394	Inf	Inf	0.750735	1
38	ABCA5	108.592	143.886	73.2979	0.509418	-0.973079	0.00182087	0.0759489
39	ABCA6	3.78921	7.05145	0.526968	0.0747318	-3.74213	0.0549314	0.584582
40	ABCA7	22.8099	15.5471	30.0727	1.9343	0.95181	0.111197	0.773007
41	ABCA8	0	0	0	NA	NA	NA	NA
42	ABCA9	2.21304	4.42609	0	0	#NAME?	0.0924395	0.72135
43	ABCB1	311.417	392.661	230.173	0.586188	-0.770564	0.00115418	0.055054
44	ABCB10	701.851	625.566	778.135	1.24389	0.314858	0.143096	0.833755
45	ABCB11	0	0	0	NA	NA	NA	NA
46	ABCB4	60.5208	66.953	54.0887	0.80786	-0.307823	0.454842	1
47	ABCB5	0	0	0	NA	NA	NA	NA
48	ABCB6	1499.68	1359.84	1639.51	1.20566	0.269827	0.157945	0.857626
49	ABCB7	380.753	357.238	404.268	1.13165	0.178424	0.436325	1
50	ABCB8	35.317	30.4209	40.2131	1.32189	0.402603	0.450303	1
51	ABCB9	4.77896	4.5197	5.03821	1.11472	0.156685	0.981469	1
52	ABCC1	703.2	698.939	707.462	1.01219	0.0174853	0.94079	1
53	ABCC10	331.975	332.536	331.415	0.996628	-0.00487253	0.965508	1
54	ABCC11	1.17226	2.34452	0	0	#NAME?	0.323144	1
55	ABCC12	0	0	0	NA	NA	NA	NA
56	ABCC2	3177.51	3727.52	2627.5	0.704892	-0.504526	0.0054056	0.156488
57	ABCC3	369.528	435.071	303.984	0.698699	-0.517256	0.0183089	0.32687
58	ABCC4	125.506	118.715	132.297	1.1144	0.156269	0.590547	1
59	ABCC5	239.015	261.081	216.949	0.830965	-0.26714	0.265255	0.990858
60	ABCC6	130.112	111.196	149.028	1.34023	0.422476	0.139979	0.829714
61	ABCC8	0	0	0	NA	NA	NA	NA
62	ABCC9	0	0	0	NA	NA	NA	NA
63	ABCD1	1027.12	1088.88	965.364	0.886569	-0.173695	0.401001	1
64	ABCD2	0	0	0	NA	NA	NA	NA
65	ABCD3	1570.73	1587.42	1554.05	0.978983	-0.0306446	0.879802	1
66	ABCD4	343.742	329.728	357.756	1.085	0.117699	0.614325	1
67	ABCE1	2467.55	2581.03	2354.06	0.912062	-0.132797	0.498661	1
68	ABCF1	2064.12	2129.12	1999.13	0.938948	-0.0908835	0.637539	1
69	ABCF2	1064.36	1114.47	1014.26	0.910085	-0.135927	0.497384	1
70	ABCF3	382.095	409.198	354.993	0.867534	-0.205008	0.406231	1
71	ABCG1	0.543796	1.08759	0	0	#NAME?	0.752934	1
72	ABCG2	259.104	175.354	342.855	1.95521	0.967325	5.29699e-05	0.005221
73	ABCG4	0.240337	0	0.480675	Inf	Inf	0.999087	1
74	ABCG5	211.397	182.459	240.335	1.3172	0.397472	0.0977159	0.734144
75	ABCG8	45.4934	42.7589	48.228	1.12791	0.173646	0.654234	1
76	ABHD1	21.6549	21.6045	21.7052	1.00466	0.00670729	0.959885	1
77	ABHD10	118.882	123.837	113.928	0.919982	-0.120322	0.695425	1
78	ABHD11	47.3678	44.8804	49.8552	1.11085	0.151658	0.771312	1
79	ABHD12	993.024	915.719	1070.33	1.16884	0.225077	0.220339	0.943598
80	ABHD12B	0.22509	0.450181	0	0	#NAME?	1	1
81	ABHD13	114.834	115.341	114.327	0.991203	-0.0127476	0.944632	1
82	ABHD14A	163.234	142.95	183.519	1.2838	0.360424	0.195735	0.909074
83	ABHD14B	693.105	663.2	723.01	1.09018	0.124571	0.528384	1
84	ABHD15	293.406	298.795	288.018	0.963934	-0.0529932	0.856514	1
85	ABHD16A	409.139	397.314	420.963	1.05952	0.0834147	0.704858	1
86	ABHD16B	78.4028	71.1561	85.6496	1.20369	0.26746	0.480182	1
87	ABHD2	921.422	897.003	945.842	1.05445	0.0764853	0.672337	1
88	ABHD3	638.904	530.244	747.564	1.40985	0.49554	0.0133044	0.272995
89	ABHD4	803.012	967.909	638.116	0.659272	-0.601053	0.00219783	0.0868588
90	ABHD5	167.41	169.863	164.958	0.971125	-0.0422706	0.832905	1
91	ABHD6	175.15	175.729	174.571	0.993414	-0.0095329	1	1
92	ABHD8	160.745	136.5	184.99	1.35524	0.438546	0.128032	0.806087
93	ABI1	1131.15	1177.54	1084.75	0.9212	-0.118414	0.541738	1
94	ABI2	325.72	318.384	333.056	1.04608	0.0649984	0.827032	1
95	ABI3	0	0	0	NA	NA	NA	NA
96	ABI3BP	0	0	0	NA	NA	NA	NA
97	ABL1	884.16	967.044	801.275	0.828582	-0.271284	0.166526	0.868771
98	ABL2	273.719	316.891	230.547	0.727528	-0.458926	0.0561986	0.591581
99	ABLIM1	115.817	146.262	85.3719	0.583692	-0.776721	0.0135595	0.274825
100	ABLIM2	0	0	0	NA	NA	NA	NA
101	ABLIM3	2.50019	4.5197	0.480675	0.106351	-3.23309	0.200044	0.917596
102	ABO	0	0	0	NA	NA	NA	NA
103	ABP1	0	0	0	NA	NA	NA	NA
104	ABR	1.63769	2.7947	0.480675	0.171995	-2.53956	0.426552	1
105	ABRA	0	0	0	NA	NA	NA	NA
106	ABT1	957.411	894.984	1019.84	1.1395	0.188406	0.340907	1
107	ABTB1	60.8995	59.0012	62.7979	1.06435	0.0899723	0.837561	1
108	ABTB2	608.303	662.477	554.129	0.836449	-0.25765	0.185397	0.891921
109	ACAA1	1880.36	1537.6	2223.11	1.44583	0.531899	0.00363662	0.124162
110	ACAA2	1310.62	1186.11	1435.13	1.20995	0.274943	0.157542	0.857343
111	ACACA	454.106	388.685	519.527	1.33663	0.418598	0.048074	0.547116
112	ACACB	126.201	153.995	98.4072	0.639029	-0.646046	0.0248558	0.386105
113	ACAD10	119.101	122.897	115.306	0.938234	-0.091981	0.801872	1
114	ACAD8	311.484	295.135	327.833	1.11079	0.151583	0.461227	1
115	ACAD9	238.237	217.962	258.512	1.18604	0.246157	0.299871	1
116	ACADL	0.240337	0	0.480675	Inf	Inf	0.999087	1
117	ACADM	302.365	319.864	284.867	0.89059	-0.167166	0.430008	1
118	ACADS	512.905	512.526	513.285	1.00148	0.0021361	0.999388	1
119	ACADSB	941.686	961.343	922.029	0.959104	-0.0602404	0.741511	1
120	ACADVL	865.588	886.193	844.982	0.953496	-0.0687017	0.688974	1
121	ACAN	0	0	0	NA	NA	NA	NA
122	ACAP1	12.9116	14.6288	11.1944	0.76523	-0.386034	0.688085	1
123	ACAP2	196.804	193.023	200.585	1.03918	0.0554418	0.850901	1
124	ACAP3	388.8	374.305	403.295	1.07745	0.107622	0.636891	1
125	ACAT1	787.908	786.881	788.934	1.00261	0.00375897	0.965904	1
126	ACAT2	3532.34	3060.62	4004.05	1.30825	0.387634	0.0325568	0.443346
127	ACBD3	1147.4	1043.67	1251.14	1.19879	0.261579	0.197968	0.912119
128	ACBD4	245.609	242.138	249.08	1.02867	0.0407793	0.835531	1
129	ACBD5	311.626	305.079	318.173	1.04292	0.0606266	0.779064	1
130	ACBD6	197.192	201.345	193.04	0.958752	-0.0607698	0.897368	1
131	ACBD7	23.4767	25.451	21.5023	0.844849	-0.243234	0.666815	1
132	ASIC2	0	0	0	NA	NA	NA	NA
133	ASIC1	7.25442	7.50163	7.00721	0.934091	-0.0983652	1	1
134	ASIC3	2.29508	0.993977	3.59619	3.61798	1.85518	0.456611	1
135	ASIC5	0	0	0	NA	NA	NA	NA
136	ACCS	1.02396	0.993977	1.05394	1.06032	0.0845028	1	1
137	ACCSL	0	0	0	NA	NA	NA	NA
138	ACD	198.305	189.324	207.286	1.09488	0.130767	0.55589	1
139	ACE	0	0	0	NA	NA	NA	NA
140	ACE2	3.34426	4.23886	2.44967	0.577908	-0.791089	0.685617	1
141	ACER1	0	0	0	NA	NA	NA	NA
142	ACER2	150.122	147.371	152.873	1.03733	0.0528775	0.804614	1
143	ACER3	143.427	144.915	141.939	0.979459	-0.0299431	0.94023	1
144	ACHE	11.2698	9.20874	13.3308	1.44763	0.53369	0.601977	1
145	ACIN1	459.588	464.918	454.258	0.977071	-0.0334652	0.951572	1
146	ACLY	7152.56	6538.12	7767.01	1.18796	0.248484	0.152109	0.852433
147	ACMSD	0.22509	0.450181	0	0	#NAME?	1	1
148	ACN9	734.991	696.059	773.923	1.11186	0.15298	0.456621	1
149	ACO1	438.459	422.066	454.853	1.07768	0.107932	0.586874	1
150	ACO2	1182.19	1235.32	1129.07	0.913992	-0.129747	0.507084	1
151	ACOT11	69.9079	70.6302	69.1855	0.979547	-0.0298137	0.92766	1
152	ACOT12	0.80728	1.08759	0.526968	0.484527	-1.04535	1	1
153	ACOT13	878.123	730.375	1025.87	1.40458	0.490142	0.0152101	0.292866
154	ACOT2	615.178	580.451	649.905	1.11966	0.163055	0.437832	1
155	ACOT4	0	0	0	NA	NA	NA	NA
156	ACOT6	1.26481	1.08759	1.44202	1.32589	0.406959	0.991921	1
157	ACOT7	711.261	701.951	720.571	1.02653	0.0377697	0.870723	1
158	ACOT8	423.405	375.821	470.99	1.25323	0.32565	0.1443	0.835886
159	ACOT9	480.425	468.675	492.175	1.05014	0.0705826	0.757148	1
160	ACOX1	1570.91	1562.09	1579.73	1.0113	0.0162055	0.893012	1
161	ACOX2	160.574	156.184	164.965	1.05622	0.0789144	0.693888	1
162	ACOX3	98.2854	86.0079	110.563	1.2855	0.362327	0.251244	0.977889
163	ACOXL	0	0	0	NA	NA	NA	NA
164	ACP1	4019.61	4044.5	3994.72	0.987691	-0.0178687	0.964869	1
165	ACP2	328.035	313.748	342.321	1.09107	0.125741	0.618266	1
166	ACP5	40.3784	35.7832	44.9736	1.25684	0.329797	0.451855	1
167	ACP6	429.041	443.714	414.369	0.933864	-0.0987155	0.66748	1
168	ACPL2	53.3437	52.645	54.0424	1.02654	0.0377951	0.967016	1
169	ACPP	1.54302	0.543796	2.54225	4.67501	2.22497	0.503194	1
170	ACPT	0.240337	0	0.480675	Inf	Inf	0.999087	1
171	ACR	15.3724	20.0489	10.696	0.533495	-0.906452	0.202555	0.920996
172	ACRBP	3.22069	4.42609	2.01529	0.45532	-1.13505	0.561123	1
173	ACRC	6.28987	3.16916	9.41058	2.96942	1.57018	0.165503	0.868089
174	ACRV1	0	0	0	NA	NA	NA	NA
175	ACSBG1	2.02528	2.08157	1.96899	0.945918	-0.0802133	1	1
176	ACSBG2	0.271898	0.543796	0	0	#NAME?	1	1
177	ACSF2	517.47	587.337	447.603	0.762089	-0.391968	0.0634188	0.622127
178	ACSF3	190.218	214.324	166.111	0.775046	-0.367646	0.176949	0.878598
179	ACSL1	558.089	470.609	645.568	1.37177	0.456039	0.0312041	0.435539
180	ACSL3	2012.81	1759.64	2265.99	1.28776	0.364863	0.0440185	0.522556
181	ACSL4	3282.75	2677.56	3887.94	1.45205	0.538087	0.00337054	0.118751
182	ACSL5	644.97	675.342	614.598	0.910054	-0.135976	0.529707	1
183	ACSL6	11.853	8.77645	14.9295	1.70108	0.766453	0.319087	1
184	ACSM1	5.81081	5.96386	5.65777	0.948675	-0.0760136	1	1
185	ACSM2A	11.9246	13.5412	10.3079	0.761224	-0.393608	0.610812	1
186	ACSM2B	63.089	88.1831	37.9949	0.430864	-1.2147	0.00144645	0.0654422
187	ACSM3	62.2647	48.8921	75.6372	1.54702	0.629496	0.0859834	0.702764
188	ACSM4	0	0	0	NA	NA	NA	NA
189	ACSM5	2.537	2.53175	2.54225	1.00415	0.00597327	1	1
190	ACSS2	7.35384	6.50766	8.20002	1.26006	0.33349	0.817176	1
191	ACSS3	814.168	630.969	997.366	1.58069	0.660555	0.00106332	0.0519396
192	ACTA1	13.4444	12.8281	14.0607	1.09609	0.132364	0.909812	1
193	ACTA2	1464.48	1622.81	1306.15	0.80487	-0.313172	0.0891091	0.714437
194	ACTB	58726.9	57883.7	59570	1.02913	0.0414286	0.862147	1
195	ACTBL2	0.526968	0	1.05394	Inf	Inf	0.750735	1
196	ACTC1	0	0	0	NA	NA	NA	NA
197	ACTG1	81407.4	77606.1	85208.7	1.09796	0.13483	0.453795	1
198	ACTG2	1.20275	1.44416	0.96135	0.665682	-0.587094	1	1
199	ACTL10	42.4673	34.9406	49.994	1.43083	0.516851	0.27743	1
200	ACTL6A	325.864	310.508	341.221	1.09891	0.136076	0.617475	1
201	ACTL6B	0	0	0	NA	NA	NA	NA
202	ACTL7A	8.88946	7.3144	10.4645	1.43067	0.516694	0.628687	1
203	ACTL7B	1.71447	1.89434	1.53461	0.810104	-0.303821	1	1
204	ACTL8	2.49912	3.07554	1.9227	0.625157	-0.677709	0.880234	1
205	ACTL9	0.526968	0	1.05394	Inf	Inf	0.750735	1
206	ACTN1	5347.03	5104.02	5590.03	1.09522	0.131222	0.482168	1
207	ACTN2	0	0	0	NA	NA	NA	NA
208	ACTN3	4.78002	5.96386	3.59619	0.602997	-0.729778	0.633645	1
209	ACTN4	10894.2	11627.9	10160.6	0.87381	-0.194608	0.273969	1
210	ACTR10	590.061	591.367	588.755	0.995584	-0.00638522	1	1
211	ACTR1A	803.398	856.223	750.573	0.876609	-0.189994	0.328698	1
212	ACTR1B	1447.91	1382.19	1513.62	1.09509	0.131046	0.486054	1
213	ACTR2	5310.79	5483.96	5137.62	0.936845	-0.0941171	0.614171	1
214	ACTR3	1817.78	1907.33	1728.23	0.906098	-0.142261	0.478479	1
215	ACTR3B	29.562	31.1877	27.9362	0.895744	-0.158841	0.854152	1
216	ACTR3BP2	4.10001	0	8.20002	Inf	Inf	0.00910544	0.216323
217	ACTR3C	7.66095	11.3839	3.93798	0.345925	-1.53147	0.166795	0.868816
218	ACTR5	227.586	229.894	225.278	0.979921	-0.0292624	0.900688	1
219	ACTR6	166.084	166.15	166.019	0.999212	-0.00113698	0.986259	1
220	ACTR8	608.023	681.137	534.909	0.785317	-0.348652	0.101428	0.744638
221	ACTRT1	0	0	0	NA	NA	NA	NA
222	ACTRT2	0.263484	0	0.526968	Inf	Inf	0.999088	1
223	ACVR1	457.251	526.183	388.32	0.737994	-0.438319	0.0378101	0.482355
224	ACVR1B	278.356	296.763	259.95	0.875953	-0.191074	0.513567	1
225	ACVR1C	8.55973	11.6469	5.4726	0.469877	-1.08965	0.278787	1
226	ACVR2A	147.891	161.006	134.775	0.837078	-0.256565	0.365122	1
227	ACVR2B	189.782	180.061	199.502	1.10797	0.147919	0.546941	1
228	ACVRL1	0	0	0	NA	NA	NA	NA
229	ACY1	463.439	447.298	479.581	1.07217	0.100538	0.651141	1
230	ACY3	76.5373	70.2736	82.8011	1.17827	0.236667	0.492308	1
231	ACYP1	94.2012	79.6696	108.733	1.3648	0.448687	0.171065	0.872825
232	ACYP2	262.972	211.873	314.071	1.48236	0.567895	0.02086	0.351394
233	ADA	100.214	83.5876	116.84	1.39782	0.483176	0.118954	0.787703
234	ADAD1	0	0	0	NA	NA	NA	NA
235	ADAD2	0	0	0	NA	NA	NA	NA
236	ADAL	175.216	164.492	185.94	1.13039	0.17682	0.44013	1
237	ADAM1A	40.6094	36.327	44.8918	1.23577	0.305411	0.525955	1
238	ADAM10	813.756	804.197	823.315	1.02377	0.0338951	0.874198	1
239	ADAM11	9.47221	16.541	2.40337	0.145298	-2.78292	0.00875547	0.212882
240	ADAM12	0	0	0	NA	NA	NA	NA
241	ADAM15	626.351	633.92	618.781	0.976119	-0.0348717	0.891147	1
242	ADAM17	432.647	459.751	405.542	0.88209	-0.181002	0.395175	1
243	ADAM18	0.263484	0	0.526968	Inf	Inf	0.999088	1
244	ADAM19	10.8901	16.3538	5.4263	0.331807	-1.59158	0.080079	0.681763
245	ADAM2	0	0	0	NA	NA	NA	NA
246	ADAM20	0	0	0	NA	NA	NA	NA
247	ADAM21	0	0	0	NA	NA	NA	NA
248	ADAM21P1	0.790452	0	1.5809	Inf	Inf	0.551873	1
249	ADAM22	26.222	26.7438	25.7003	0.960983	-0.0574174	0.919218	1
250	ADAM23	3.21176	3.78868	2.63484	0.695451	-0.523979	0.78201	1
251	ADAM28	0.271898	0.543796	0	0	#NAME?	1	1
252	ADAM29	0	0	0	NA	NA	NA	NA
253	ADAM30	0.263484	0	0.526968	Inf	Inf	0.999088	1
254	ADAM32	0.767305	0	1.53461	Inf	Inf	0.557178	1
255	ADAM33	0	0	0	NA	NA	NA	NA
256	ADAM6	0	0	0	NA	NA	NA	NA
257	ADAM7	0	0	0	NA	NA	NA	NA
258	ADAM8	0.543796	1.08759	0	0	#NAME?	0.752934	1
259	ADAM9	3279	2987.22	3570.79	1.19536	0.257441	0.15815	0.858264
260	ADAMDEC1	0	0	0	NA	NA	NA	NA
261	ADAMTS1	9.11297	6.22681	11.9991	1.92701	0.946364	0.35215	1
262	ADAMTS10	1.62927	2.2509	1.00764	0.447661	-1.15952	0.711589	1
263	ADAMTS12	0	0	0	NA	NA	NA	NA
264	ADAMTS13	15.882	16.3538	15.4101	0.942297	-0.0857461	0.981347	1
265	ADAMTS14	0.22509	0.450181	0	0	#NAME?	1	1
266	ADAMTS15	0	0	0	NA	NA	NA	NA
267	ADAMTS16	0.22509	0.450181	0	0	#NAME?	1	1
268	ADAMTS17	2.06474	3.07554	1.05394	0.342683	-1.54506	0.576066	1
269	ADAMTS18	0	0	0	NA	NA	NA	NA
270	ADAMTS19	0	0	0	NA	NA	NA	NA
271	ADAMTS2	43.436	24.9251	61.9469	2.48532	1.31343	0.00368118	0.124418
272	ADAMTS20	0.240337	0	0.480675	Inf	Inf	0.999087	1
273	ADAMTS3	0.535382	0.543796	0.526968	0.969054	-0.0453505	1	1
274	ADAMTS4	107.196	124.341	90.0505	0.724224	-0.465492	0.137475	0.826446
275	ADAMTS5	0	0	0	NA	NA	NA	NA
276	ADAMTS6	236.813	201.51	272.117	1.35039	0.433373	0.054996	0.584893
277	ADAMTS7	15.9682	9.5653	22.3711	2.33877	1.22575	0.0942217	0.727827
278	ADAMTS8	0.271898	0.543796	0	0	#NAME?	1	1
279	ADAMTS9	0.675271	1.35054	0	0	#NAME?	0.588866	1
280	ADAMTSL1	0.675271	1.35054	0	0	#NAME?	0.588866	1
281	ADAMTSL2	73.2731	81.7153	64.8309	0.793375	-0.333925	0.327315	1
282	ADAMTSL3	13.1467	9.30235	16.991	1.82653	0.869107	0.277145	1
283	ADAMTSL4	149.455	150.224	148.686	0.989761	-0.0148472	0.988281	1
284	ADAMTSL5	122.391	113.447	131.335	1.15768	0.211238	0.493341	1
285	ADAP1	341.191	334.653	347.729	1.03907	0.0552967	0.800019	1
286	ADAP2	16.5178	17.3478	15.6879	0.904317	-0.145099	0.877402	1
287	ADAR	2832.13	2810.96	2853.3	1.01506	0.0215699	0.910708	1
288	ADARB1	169.024	158.363	179.684	1.13464	0.18223	0.510111	1
289	ADARB2	0	0	0	NA	NA	NA	NA
290	ADAT1	310.281	322.521	298.042	0.924101	-0.113878	0.615759	1
291	ADAT2	179.516	183.435	175.597	0.957267	-0.0630063	0.869083	1
292	ADAT3	31.6014	26.6322	36.5706	1.37317	0.457512	0.399157	1
293	ADC	0.22509	0.450181	0	0	#NAME?	1	1
294	ADCK1	65.4207	62.3218	68.5197	1.09945	0.136782	0.747154	1
295	ADCK2	126.065	101.105	151.025	1.49375	0.578939	0.0439995	0.522556
296	ADCK3	1729.89	1931.13	1528.65	0.791583	-0.337187	0.0757735	0.670135
297	ADCK4	134.381	143.641	125.122	0.871077	-0.199128	0.515274	1
298	ADCK5	81.4929	65.1165	97.8694	1.50299	0.587835	0.0847677	0.697858
299	ADCY1	5.35536	8.21476	2.49596	0.303838	-1.71862	0.195423	0.909074
300	ADCY10	1.38104	1.80072	0.96135	0.533869	-0.905443	0.850342	1
301	ADCY2	0	0	0	NA	NA	NA	NA
302	ADCY3	2.9698	0.993977	4.94563	4.9756	2.31487	0.244962	0.974234
303	ADCY4	0.22509	0.450181	0	0	#NAME?	1	1
304	ADCY5	0	0	0	NA	NA	NA	NA
305	ADCY6	164.027	156.598	171.456	1.09488	0.13077	0.601811	1
306	ADCY7	102.354	94.6728	110.036	1.16228	0.216953	0.492697	1
307	ADCY8	0.240337	0	0.480675	Inf	Inf	0.999087	1
308	ADCY9	643.592	590.35	696.833	1.18037	0.239241	0.224078	0.947284
309	ADCYAP1	0	0	0	NA	NA	NA	NA
310	ADCYAP1R1	0	0	0	NA	NA	NA	NA
311	ADD1	2251.56	2179.62	2323.49	1.06601	0.0922177	0.608663	1
312	ADD2	2.43494	0.543796	4.32607	7.95533	2.99192	0.194447	0.906956
313	ADD3	75.3172	57.9136	92.7209	1.60102	0.678992	0.0501281	0.558218
314	ADH1A	0	0	0	NA	NA	NA	NA
315	ADH1B	0.784133	1.08759	0.480675	0.441963	-1.178	1	1
316	ADH1C	0.900361	1.80072	0	0	#NAME?	0.442653	1
317	ADH4	39.2871	30.4388	48.1354	1.58138	0.661186	0.15449	0.8563
318	ADH5	2947.23	2898.13	2996.33	1.03389	0.0480775	0.763352	1
319	ADH6	408.564	384.785	432.343	1.1236	0.168124	0.432134	1
320	ADH7	0	0	0	NA	NA	NA	NA
321	ADHFE1	3.25118	3.52573	2.97664	0.844262	-0.244238	1	1
322	ADI1	1156.91	1388.17	925.649	0.666811	-0.58465	0.00244036	0.0935413
323	ADIG	0.240337	0	0.480675	Inf	Inf	0.999087	1
324	ADIPOQ	0.271898	0.543796	0	0	#NAME?	1	1
325	ADIPOR1	1183.77	1177.93	1189.61	1.00992	0.0142378	0.982859	1
326	ADIPOR2	1657.94	1463.03	1852.84	1.26644	0.34078	0.0770871	0.671128
327	ADK	135.453	132.858	138.047	1.03905	0.0552713	0.8871	1
328	ADM	390.721	456.64	324.803	0.711288	-0.491494	0.0227288	0.366828
329	ADM2	0	0	0	NA	NA	NA	NA
330	ADNP	422.469	383.06	461.878	1.20576	0.269942	0.20519	0.924526
331	ADNP2	635.604	631.344	639.863	1.01349	0.019336	0.845408	1
332	ADO	473.949	498.12	449.779	0.902953	-0.147277	0.483784	1
333	ADORA1	0.240337	0	0.480675	Inf	Inf	0.999087	1
334	ADORA2A	31.8066	29.5385	34.0747	1.15357	0.206106	0.702335	1
335	ADORA2B	203.433	215.599	191.267	0.887141	-0.172765	0.528426	1
336	ADORA3	0	0	0	NA	NA	NA	NA
337	ADPGK	458.702	403.091	514.314	1.27593	0.351547	0.102649	0.74623
338	ADPRH	0.496988	0.993977	0	0	#NAME?	0.764234	1
339	ADPRHL1	9.83663	9.20874	10.4645	1.13637	0.18443	0.904625	1
340	ADPRHL2	254.359	279.798	228.92	0.818163	-0.289539	0.231248	0.95659
341	ADRA1A	0	0	0	NA	NA	NA	NA
342	ADRA1B	0.22509	0.450181	0	0	#NAME?	1	1
343	ADRA1D	7.03563	6.58338	7.48788	1.13739	0.18573	0.976311	1
344	ADRA2A	0	0	0	NA	NA	NA	NA
345	ADRA2B	2.31033	0.543796	4.07686	7.49705	2.90632	0.240445	0.968742
346	ADRA2C	1178.08	870.214	1485.96	1.70757	0.771949	6.6478e-05	0.0062723
347	ADRB1	0	0	0	NA	NA	NA	NA
348	ADRB2	1.32793	2.17518	0.480675	0.220981	-2.178	0.645535	1
349	ADRBK1	712.397	780.789	644.005	0.824813	-0.277862	0.194205	0.906911
350	ADRBK2	84.4846	102.326	66.6433	0.651285	-0.61864	0.0604166	0.610024
351	ADRM1	4938.7	4942.24	4935.16	0.998567	-0.00206887	0.969312	1
352	ADSL	1496.12	1561.87	1430.36	0.915802	-0.126892	0.524699	1
353	ADSS	365.751	345.016	386.486	1.1202	0.163752	0.485211	1
354	ADSSL1	1.93115	1.80072	2.06158	1.14486	0.195173	1	1
355	AEBP1	0.263484	0	0.526968	Inf	Inf	0.999088	1
356	AEBP2	565.072	507.627	622.516	1.22633	0.294342	0.148263	0.844255
357	AEN	1644.85	1888.12	1401.58	0.742314	-0.429898	0.0247972	0.385626
358	AES	3146.28	3151.62	3140.95	0.996614	-0.00489334	0.998667	1
359	AFAP1	44.8476	49.4359	40.2594	0.814376	-0.296232	0.536715	1
360	AFAP1L1	6.7585	7.95181	5.56518	0.699863	-0.514855	0.696123	1
361	AFAP1L2	0.22509	0.450181	0	0	#NAME?	1	1
362	AFF1	849.849	917.162	782.536	0.853215	-0.229019	0.213501	0.935855
363	AFF2	0	0	0	NA	NA	NA	NA
364	AFF3	0.263484	0	0.526968	Inf	Inf	0.999088	1
365	AFF4	1231.33	1146.11	1316.54	1.1487	0.200005	0.314814	1
366	AFG3L2	478.6	465.301	491.9	1.05717	0.0802017	0.687823	1
367	AFM	20.1555	19.9553	20.3558	1.02007	0.0286694	1	1
368	AFMID	481.611	474.982	488.24	1.02791	0.0397181	0.860715	1
369	AFP	21106.3	18678.7	23533.9	1.25993	0.333349	0.052382	0.572159
370	AFTPH	605.26	588.898	621.623	1.05557	0.0780218	0.64663	1
371	AGA	130.416	135.091	125.742	0.93079	-0.103473	0.707736	1
372	AGAP1	376.868	396.226	357.51	0.902288	-0.14834	0.500509	1
373	AGAP11	0	0	0	NA	NA	NA	NA
374	AGAP2	14.3937	15.7343	13.0531	0.829593	-0.269524	0.805915	1
375	AGAP3	1066.11	942.697	1189.53	1.26184	0.335526	0.0973855	0.733401
376	AGAP5	41.9593	47.3942	36.5243	0.770649	-0.375853	0.385447	1
377	AGAP6	114.591	128.151	101.031	0.788374	-0.343048	0.255062	0.98003
378	AGAP7	21.9747	24.3235	19.6259	0.806869	-0.309594	0.683021	1
379	AGBL1	0	0	0	NA	NA	NA	NA
380	AGBL2	4.75056	7.05145	2.44967	0.347399	-1.52533	0.316891	1
381	AGBL3	5.41165	10.2963	0.526968	0.0511801	-4.28827	0.00900543	0.215672
382	AGBL4	0.488574	0.450181	0.526968	1.17057	0.22721	1	1
383	AGBL5	71.6212	76.4426	66.7999	0.873857	-0.19453	0.624584	1
384	AGER	48.0308	46.6054	49.4563	1.06117	0.0856569	0.828627	1
385	AGFG1	6.81162	6.95784	6.66541	0.957972	-0.0619452	1	1
386	AGFG2	5331.28	6041.27	4621.29	0.764954	-0.386555	0.0340595	0.454211
387	AGGF1	163.877	158.082	169.672	1.07332	0.102074	0.72131	1
388	AGK	4.35824	2.53175	6.18473	2.44287	1.28858	0.407157	1
389	AGL	366.096	353.682	378.51	1.0702	0.0978788	0.575128	1
390	AGMAT	3067.85	3325.31	2810.38	0.845148	-0.242724	0.190242	0.899703
391	AGMO	1.90959	3.3385	0.480675	0.14398	-2.79606	0.335106	1
392	AGPAT1	1814.21	1795.56	1832.87	1.02078	0.0296688	0.825921	1
393	AGPAT2	170.198	194.333	146.062	0.751605	-0.411954	0.126345	0.804316
394	AGPAT3	1009.34	979.992	1038.69	1.0599	0.0839239	0.698344	1
395	AGPAT4	0.22509	0.450181	0	0	#NAME?	1	1
396	AGPAT5	611.288	568.897	653.678	1.14903	0.200413	0.310477	1
397	AGPAT6	662.232	717.681	606.782	0.845476	-0.242165	0.236284	0.961806
398	AGPAT9	241.554	341.197	141.91	0.415919	-1.26563	4.35979e-07	9.62584e-05
399	AGPHD1	39.9682	36.6078	43.3286	1.18359	0.24317	0.578451	1
400	AGPS	928.067	1044.44	811.693	0.777156	-0.363724	0.0648589	0.62844
401	AGR2	74.7257	64.4212	85.0301	1.31991	0.400437	0.251031	0.977386
402	AGR3	0	0	0	NA	NA	NA	NA
403	AGRN	1759.86	1539.78	1979.93	1.28585	0.362726	0.0478932	0.545941
404	AGRP	1.27954	0.543796	2.01529	3.70596	1.88985	0.636975	1
405	AGT	21920.8	21164.8	22676.8	1.07144	0.0995502	0.581769	1
406	AGTPBP1	159.713	130.139	189.287	1.4545	0.540519	0.0487194	0.549862
407	AGTR1	0.271898	0.543796	0	0	#NAME?	1	1
408	AGTR2	0	0	0	NA	NA	NA	NA
409	AGTRAP	483.165	466.006	500.325	1.07365	0.102517	0.583048	1
410	AGXT	399.98	422.382	377.577	0.893924	-0.161777	0.513836	1
411	AGXT2	2.30666	4.61332	0	0	#NAME?	0.0879091	0.710929
412	AGXT2L1	157.97	231.623	84.3179	0.364031	-1.45787	1.41998e-07	4.27517e-05
413	AGXT2L2	131.409	110.055	152.763	1.38806	0.473073	0.114918	0.779667
414	AHCTF1	486.512	433.119	539.904	1.24655	0.31794	0.146025	0.840024
415	AHCY	2774.86	2533.46	3016.27	1.19058	0.25166	0.167606	0.868959
416	AHCYL1	2109.37	2243.29	1975.45	0.880603	-0.183437	0.344195	1
417	AHCYL2	78.8147	91.7446	65.8849	0.718134	-0.477676	0.192592	0.903792
418	AHDC1	73.6691	81.546	65.7923	0.806812	-0.309696	0.371638	1
419	AHI1	112.98	129.613	96.3456	0.74333	-0.427925	0.150772	0.849775
420	AHNAK	221.572	202.642	240.503	1.18684	0.24712	0.315657	1
421	AHNAK2	8.19582	11.8341	4.55754	0.385119	-1.37662	0.18233	0.884715
422	AHR	499.808	435.472	564.145	1.29548	0.373486	0.102355	0.745996
423	AHRR	10.3978	10.858	9.93755	0.915226	-0.127799	1	1
424	AHSA1	771.689	843.194	700.184	0.830395	-0.268131	0.159321	0.858264
425	AHSA2	294.186	244.014	344.357	1.41122	0.496938	0.0261197	0.397407
426	AHSG	47264.3	41821.4	52707.2	1.26029	0.333758	0.067009	0.635459
427	AHSP	0.271898	0.543796	0	0	#NAME?	1	1
428	AICDA	0	0	0	NA	NA	NA	NA
429	AIDA	1315.72	1327.73	1303.7	0.981906	-0.0263425	0.86509	1
430	AIF1	15.457	9.84615	21.0679	2.13971	1.09742	0.132324	0.814558
431	AIF1L	652.597	742.481	562.713	0.757882	-0.399956	0.0474461	0.543623
432	AIFM1	2425.01	2459.25	2390.78	0.972156	-0.0407396	0.888526	1
433	AIFM2	153.333	164.496	142.17	0.864276	-0.210436	0.440511	1
434	AIG1	1117.33	1070.36	1164.3	1.08777	0.121374	0.576744	1
435	AIM1	338.294	325.423	351.165	1.0791	0.109834	0.564194	1
436	AIM1L	15.0716	20.6863	9.45687	0.457157	-1.12924	0.132291	0.814558
437	AIM2	0	0	0	NA	NA	NA	NA
438	AIMP1	624.54	600.115	648.964	1.0814	0.112899	0.609304	1
439	AIMP2	847.068	853.619	840.516	0.98465	-0.0223178	0.904403	1
440	AIP	765.63	663.748	867.512	1.30699	0.386249	0.0571408	0.596591
441	AIPL1	0	0	0	NA	NA	NA	NA
442	AIRE	0	0	0	NA	NA	NA	NA
443	AJAP1	0.767305	0	1.53461	Inf	Inf	0.557178	1
444	AJUBA	2294.09	2453.84	2134.33	0.869791	-0.201259	0.270331	0.995958
445	AK1	552.176	481.511	622.84	1.29351	0.371292	0.0833516	0.695071
446	AK2	1747.98	1860.42	1635.53	0.879121	-0.185867	0.308473	1
447	AK3	4108.76	4050.58	4166.94	1.02873	0.0408616	0.789942	1
448	AK4	3544.24	3670.79	3417.69	0.931048	-0.103073	0.5381	1
449	AK5	0	0	0	NA	NA	NA	NA
450	AK7	0.263484	0	0.526968	Inf	Inf	0.999088	1
451	AK8	0	0	0	NA	NA	NA	NA
452	AKAP1	791.05	794.319	787.781	0.991768	-0.0119255	0.918734	1
453	AKAP10	125.286	131.374	119.197	0.907311	-0.14033	0.663371	1
454	AKAP11	398.823	361.642	436.003	1.20562	0.269775	0.212666	0.934806
455	AKAP12	517.066	738.28	295.852	0.400732	-1.31929	7.45869e-10	4.11695e-07
456	AKAP13	38.7165	41.9164	35.5167	0.847323	-0.239015	0.638542	1
457	AKAP14	3.69927	2.7947	4.60383	1.64734	0.720142	0.766801	1
458	AKAP17A	558.465	595.249	521.681	0.876409	-0.190325	0.362007	1
459	AKAP3	0.240337	0	0.480675	Inf	Inf	0.999087	1
460	AKAP4	0	0	0	NA	NA	NA	NA
461	AKAP5	4.32826	3.52573	5.1308	1.45525	0.541263	0.775855	1
462	AKAP6	7.215	7.76458	6.66541	0.858438	-0.220215	0.863686	1
463	AKAP7	72.4621	65.8296	79.0945	1.2015	0.264842	0.480669	1
464	AKAP8	786.634	811.334	761.934	0.939113	-0.0906291	0.667626	1
465	AKAP8L	489.289	520.621	457.957	0.879637	-0.185019	0.413361	1
466	AKAP9	222.378	211.926	232.829	1.09863	0.135711	0.589457	1
467	AKD1	4.92568	4.33247	5.51889	1.27384	0.349187	0.885385	1
468	AKIP1	234.943	232.666	237.22	1.01957	0.0279614	0.87385	1
469	AKIRIN1	3039.4	2760.01	3318.8	1.20246	0.265986	0.143486	0.834153
470	AKIRIN2	266.741	295.54	237.943	0.805111	-0.312741	0.16169	0.861216
471	AKNA	55.4979	59.9015	51.0943	0.852971	-0.229432	0.574129	1
472	AKNAD1	0	0	0	NA	NA	NA	NA
473	AKR1A1	517.256	538.329	496.184	0.921711	-0.117614	0.586447	1
474	AKR1B1	3312.43	4848.44	1776.43	0.366392	-1.44854	1.18841e-15	2.18654e-12
475	AKR1B10	7613.06	11067.3	4158.81	0.375774	-1.41206	4.00713e-15	6.03219e-12
476	AKR1B15	0.22509	0.450181	0	0	#NAME?	1	1
477	AKR1C2	12258.9	12495.8	12022.1	0.962095	-0.0557487	0.684536	1
478	AKR1C3	1760.59	2043.88	1477.29	0.722785	-0.468361	0.0104111	0.235839
479	AKR1C4	5.41319	3.3385	7.48788	2.24289	1.16536	0.399913	1
480	AKR1CL1	0.480675	0	0.96135	Inf	Inf	0.762071	1
481	AKR1D1	138.364	140.133	136.594	0.974748	-0.0368982	0.950934	1
482	AKR1E2	0	0	0	NA	NA	NA	NA
483	AKR7A2	560.801	531.736	589.866	1.10932	0.149677	0.50384	1
484	AKR7A2P1	11.0631	11.3839	10.7423	0.943635	-0.0836985	0.963555	1
485	AKR7A3	26.2756	25.206	27.3452	1.08487	0.117523	0.874794	1
486	AKT1	846.214	769.332	923.096	1.19987	0.262874	0.181352	0.883276
487	AKT1S1	351.592	312.394	390.791	1.25096	0.323032	0.155084	0.85677
488	AKT2	2067.29	1906.67	2227.91	1.16848	0.224637	0.213651	0.935855
489	AKT3	5.0661	4.61332	5.51889	1.19629	0.258573	0.884716	1
490	AKTIP	307.561	296.753	318.369	1.07284	0.101437	0.670971	1
491	ALAD	254.86	253.843	255.877	1.00802	0.0115172	0.986676	1
492	ALAS1	458.274	482.376	434.173	0.900071	-0.151889	0.433183	1
493	ALAS2	0	0	0	NA	NA	NA	NA
494	ALB	153560	132004	175116	1.3266	0.407731	0.0171778	0.314161
495	ALCAM	264.47	269.541	259.399	0.962371	-0.055335	0.808075	1
496	ALDH16A1	515.109	447.017	583.201	1.30465	0.383663	0.0699856	0.643829
497	ALDH18A1	5071.56	5441.21	4701.92	0.864132	-0.210677	0.215994	0.937768
498	ALDH1A1	8749.24	8578.27	8920.22	1.03986	0.0563924	0.74979	1
499	ALDH1A2	0.675271	1.35054	0	0	#NAME?	0.588866	1
500	ALDH1A3	0	0	0	NA	NA	NA	NA
501	ALDH1B1	246.215	221.42	271.01	1.22396	0.291558	0.258769	0.983465
502	ALDH1L1	48.7946	61.6844	35.9048	0.582073	-0.780729	0.0645672	0.627447
503	ALDH1L2	27.8712	24.0248	31.7176	1.3202	0.400761	0.482446	1
504	ALDH2	2928.13	3373.21	2483.05	0.736109	-0.44201	0.0156868	0.298916
505	ALDH3A1	26.6638	39.7012	13.6263	0.343222	-1.54279	0.00794787	0.200318
506	ALDH3A2	64.8618	68.9409	60.7826	0.881662	-0.181703	0.638484	1
507	ALDH3B1	38.1727	32.9527	43.3927	1.31682	0.397056	0.418896	1
508	ALDH3B2	0	0	0	NA	NA	NA	NA
509	ALDH4A1	803.922	810.902	796.942	0.982785	-0.0250525	0.930599	1
510	ALDH5A1	832.587	847.616	817.558	0.964538	-0.0520895	0.773607	1
511	ALDH6A1	24.8593	27.5505	22.1681	0.804637	-0.313591	0.597543	1
512	ALDH7A1	966.024	925.747	1006.3	1.08701	0.12037	0.554016	1
513	ALDH8A1	17.8511	27.9828	7.71934	0.27586	-1.85799	0.00586832	0.166108
514	ALDH9A1	698.017	637.646	758.388	1.18936	0.250181	0.228826	0.954451
515	ALDOB	11.2214	14.816	7.62676	0.514764	-0.958017	0.266128	0.991634
516	ALDOC	577.502	417.929	737.074	1.76364	0.818554	8.92304e-05	0.00794391
517	ALG1	1001.83	1028.28	975.38	0.948557	-0.0761942	0.670582	1
518	ALG10	144.036	112.939	175.134	1.5507	0.632916	0.0212071	0.354356
519	ALG10B	123.347	90.4918	156.202	1.72615	0.787557	0.00842882	0.208318
520	ALG11	209.893	195.666	224.12	1.14542	0.195879	0.429996	1
521	ALG12	338.689	334.293	343.086	1.0263	0.0374587	0.79965	1
522	ALG13	123.197	105.852	140.543	1.32774	0.408968	0.177828	0.878598
523	ALG14	123.673	110.879	136.466	1.23076	0.299553	0.347571	1
524	ALG1L	0.488574	0.450181	0.526968	1.17057	0.22721	1	1
525	ALG1L2	0	0	0	NA	NA	NA	NA
526	ALG2	703.784	759.259	648.309	0.853871	-0.22791	0.260423	0.985508
527	ALG3	56.6575	58.4216	54.8934	0.939608	-0.0898697	0.801815	1
528	ALG5	286.282	287.865	284.7	0.989005	-0.0159501	0.937945	1
529	ALG6	119.631	119.861	119.4	0.996157	-0.00555535	0.998903	1
530	ALG8	746.592	672.533	820.652	1.22024	0.287166	0.173674	0.875387
531	ALG9	778.526	748.16	808.891	1.08117	0.112598	0.574284	1
532	ALK	0	0	0	NA	NA	NA	NA
533	ALKBH1	165.829	193.206	138.453	0.716608	-0.480744	0.0865102	0.704586
534	ALKBH2	140.402	151.2	129.605	0.857174	-0.22234	0.45288	1
535	ALKBH3	158.559	175.844	141.273	0.803397	-0.315815	0.23661	0.962254
536	ALKBH4	105.129	90.0237	120.234	1.33558	0.417462	0.208558	0.927806
537	ALKBH5	2093.39	2162.79	2023.99	0.935823	-0.0956926	0.613895	1
538	ALKBH6	64.8853	44.1673	85.6033	1.93816	0.95469	0.0115282	0.250849
539	ALKBH7	237.799	202.566	273.032	1.34787	0.430676	0.0697684	0.642544
540	ALKBH8	361.002	389.946	332.059	0.851552	-0.231833	0.293058	1
541	ALLC	9.48589	16.4295	2.54225	0.154737	-2.69211	0.00757645	0.195418
542	ALMS1	65.9036	65.228	66.5793	1.02072	0.0295815	0.984004	1
543	ALOX12	4.5402	6.05747	3.02293	0.499041	-1.00277	0.533068	1
544	ALOX12B	2.9572	4.42609	1.48832	0.33626	-1.57235	0.440747	1
545	ALOX15	1.68291	1.35054	2.01529	1.4922	0.577445	0.989532	1
546	ALOX15B	0	0	0	NA	NA	NA	NA
547	ALOX5	0	0	0	NA	NA	NA	NA
548	ALOX5AP	0	0	0	NA	NA	NA	NA
549	ALOXE3	1.18751	1.89434	0.480675	0.253743	-1.97856	0.661777	1
550	ALPI	0.992396	0.450181	1.53461	3.40888	1.7693	0.801581	1
551	ALPK1	20.2749	25.0009	15.549	0.62194	-0.685154	0.260973	0.985508
552	ALPK2	0.22509	0.450181	0	0	#NAME?	1	1
553	ALPK3	1.48255	2.43813	0.526968	0.216136	-2.20999	0.524105	1
554	ALPL	25.3937	35.7653	15.0221	0.420018	-1.25148	0.0282142	0.41345
555	ALPP	1.30269	0.543796	2.06158	3.79109	1.92261	0.634513	1
556	ALPPL2	1.12545	2.2509	0	0	#NAME?	0.331415	1
557	ALS2	360.138	355.491	364.784	1.02614	0.0372302	0.86615	1
558	ALS2CL	0	0	0	NA	NA	NA	NA
559	ALS2CR11	0.496988	0.993977	0	0	#NAME?	0.764234	1
560	ALS2CR12	0.744159	0	1.48832	Inf	Inf	0.562674	1
561	ALS2CR8	14.491	13.7284	15.2535	1.11109	0.151974	0.910811	1
562	ALX1	0	0	0	NA	NA	NA	NA
563	ALX3	0	0	0	NA	NA	NA	NA
564	ALX4	0	0	0	NA	NA	NA	NA
565	ALYREF	2479.05	1929.79	3028.31	1.56924	0.650067	0.000489797	0.0294929
566	AMACR	732.91	499.693	966.126	1.93344	0.951167	1.94825e-06	0.000343204
567	AMBN	0	0	0	NA	NA	NA	NA
568	AMBP	17518.9	16266.8	18771	1.15395	0.206577	0.226866	0.951707
569	AMBRA1	258.352	308.979	207.724	0.672291	-0.572842	0.0158693	0.300806
570	AMD1	2619.6	2642.89	2596.31	0.982375	-0.0256545	0.886098	1
571	AMDHD1	94.6181	68.0984	121.138	1.77886	0.830956	0.0104625	0.236355
572	AMDHD2	121.71	101.047	142.373	1.40898	0.494651	0.0823743	0.69083
573	AMELX	0.22509	0.450181	0	0	#NAME?	1	1
574	AMELY	0.450181	0.900361	0	0	#NAME?	0.776604	1
575	AMFR	1115.09	1235.08	995.106	0.805702	-0.311682	0.104973	0.751839
576	AMH	0	0	0	NA	NA	NA	NA
577	AMHR2	6.46347	6.7885	6.13844	0.904241	-0.145221	1	1
578	AMICA1	0	0	0	NA	NA	NA	NA
579	AMIGO1	11.0462	9.0394	13.0531	1.44402	0.530089	0.542039	1
580	AMIGO2	0	0	0	NA	NA	NA	NA
581	AMIGO3	119.148	113.22	125.076	1.10472	0.143677	0.595232	1
582	AMMECR1	86.7302	88.0137	85.4467	0.970834	-0.0427037	0.929083	1
583	AMMECR1L	734.151	780.73	687.572	0.880678	-0.183313	0.366371	1
584	AMN	1040.17	1032.28	1048.07	1.0153	0.0219032	0.893458	1
585	AMN1	71.9752	68.192	75.7584	1.11096	0.151802	0.712409	1
586	AMOT	21.9499	24.0248	19.8751	0.827275	-0.273561	0.690609	1
587	AMOTL1	0.22509	0.450181	0	0	#NAME?	1	1
588	AMOTL2	633.227	733.041	533.413	0.727672	-0.458641	0.0232822	0.3717
589	AMPD1	0.496988	0.993977	0	0	#NAME?	0.764234	1
590	AMPD2	629.046	654.856	603.236	0.921174	-0.118454	0.540243	1
591	AMPD3	21.3431	29.7257	12.9605	0.436003	-1.19759	0.0581394	0.600533
592	AMPH	0	0	0	NA	NA	NA	NA
593	AMT	189.377	193.718	185.036	0.955182	-0.0661532	0.777601	1
594	AMTN	0	0	0	NA	NA	NA	NA
595	AMY2A	0	0	0	NA	NA	NA	NA
596	AMY2B	0	0	0	NA	NA	NA	NA
597	AMZ1	0.768886	1.53777	0	0	#NAME?	0.564841	1
598	AMZ2	385.81	383.866	387.753	1.01013	0.0145354	0.91304	1
599	AMZ2P1	17.0311	17.4593	16.603	0.950952	-0.0725549	1	1
600	ANAPC1	759.916	773.549	746.282	0.964751	-0.051772	0.801771	1
601	ANAPC10	212.44	228.824	196.056	0.856798	-0.222972	0.374038	1
602	ANAPC11	7.39221	6.67699	8.10743	1.21423	0.280047	0.897885	1
603	ANAPC13	1302.63	1228.55	1376.71	1.12059	0.164262	0.428873	1
604	ANAPC16	923.571	978.504	868.637	0.88772	-0.171824	0.381575	1
605	ANAPC2	256.21	264.928	247.492	0.934187	-0.0982174	0.667504	1
606	ANAPC4	127.779	134.994	120.565	0.893113	-0.163085	0.627631	1
607	ANAPC5	973.309	920.208	1026.41	1.11541	0.157576	0.396693	1
608	ANAPC7	587.43	590.68	584.18	0.988996	-0.0159635	0.925747	1
609	ANG	74.7403	46.2488	103.232	2.23209	1.1584	0.00112222	0.0538634
610	ANGEL1	361.056	368.921	353.191	0.957363	-0.0628625	0.786873	1
611	ANGEL2	149.751	127.363	172.139	1.35157	0.434637	0.117573	0.785947
612	ANGPT1	0	0	0	NA	NA	NA	NA
613	ANGPT2	5.78553	3.07554	8.49552	2.76228	1.46586	0.231702	0.956634
614	ANGPT4	0	0	0	NA	NA	NA	NA
615	ANGPTL1	13.1094	11.1967	15.0221	1.34165	0.424009	0.628753	1
616	ANGPTL2	6.03533	5.68301	6.38765	1.12399	0.16863	0.978026	1
617	ANGPTL3	4.95617	3.43211	6.48024	1.88812	0.916951	0.527531	1
618	ANGPTL4	3.98061	4.06952	3.89169	0.956302	-0.0644615	1	1
619	ANGPTL5	0.543796	1.08759	0	0	#NAME?	0.752934	1
620	ANGPTL6	4.22833	4.42609	4.03057	0.91064	-0.135048	1	1
621	ANGPTL7	1.27113	0	2.54225	Inf	Inf	0.299197	1
622	ANK1	6.98935	5.96386	8.01485	1.3439	0.426429	0.736862	1
623	ANK2	8.54026	7.57735	9.50317	1.25415	0.326714	0.830374	1
624	ANK3	0	0	0	NA	NA	NA	NA
625	ANKAR	5.21599	7.50163	2.93034	0.390627	-1.35614	0.345884	1
626	ANKDD1A	0.767305	0	1.53461	Inf	Inf	0.557178	1
627	ANKFN1	0	0	0	NA	NA	NA	NA
628	ANKFY1	427.749	494.06	361.437	0.731566	-0.450941	0.0453837	0.528859
629	ANKH	344.718	340.283	349.154	1.02607	0.0371276	0.895422	1
630	ANKIB1	505.624	554.402	456.846	0.824034	-0.279224	0.197205	0.910886
631	ANKK1	2.36871	4.25675	0.480675	0.112921	-3.14662	0.246846	0.976008
632	ANKLE1	1.00081	0.993977	1.00764	1.01375	0.0197004	1	1
633	ANKLE2	1034.83	985.489	1084.16	1.10013	0.137669	0.455409	1
634	ANKMY1	81.6229	72.3373	90.9085	1.25673	0.329676	0.340722	1
635	ANKMY2	207.145	230.892	183.398	0.794303	-0.332239	0.180575	0.882309
636	ANKRA2	135.053	133.402	136.705	1.02476	0.0352796	0.901578	1
637	ANKRD1	79.0623	75.7294	82.3952	1.08802	0.121706	0.701811	1
638	ANKRD10	327.11	311.707	342.513	1.09883	0.135969	0.591336	1
639	ANKRD11	950.724	932.523	968.925	1.03904	0.0552446	0.7502	1
640	ANKRD12	1478.5	1459.71	1497.3	1.02575	0.036674	0.82302	1
641	ANKRD13A	784.754	808.285	761.222	0.941775	-0.0865456	0.654946	1
642	ANKRD13B	44.9938	41.8985	48.0891	1.14775	0.198813	0.683092	1
643	ANKRD13C	382.432	392.233	372.632	0.950028	-0.0739583	0.749823	1
644	ANKRD13D	117.709	121.287	114.131	0.940995	-0.0877416	0.771678	1
645	ANKRD16	51.8213	57.6327	46.0098	0.798327	-0.324949	0.424398	1
646	ANKRD17	1078.19	1112.1	1044.28	0.939019	-0.0907736	0.609585	1
647	ANKRD18A	137.616	147.354	127.878	0.867831	-0.204514	0.486164	1
648	ANKRD2	0	0	0	NA	NA	NA	NA
649	ANKRD20A4	0.713665	0.900361	0.526968	0.585285	-0.77279	1	1
650	ANKRD20A9P	54.5407	38.9344	70.1469	1.80167	0.849333	0.0356559	0.46822
651	ANKRD22	0	0	0	NA	NA	NA	NA
652	ANKRD23	43.4639	43.3784	43.5493	1.00394	0.00567256	0.945198	1
653	ANKRD24	5.91545	8.41989	3.41102	0.405114	-1.3036	0.364494	1
654	ANKRD26	117.124	113.933	120.315	1.05602	0.0786366	0.7746	1
655	ANKRD26P1	0	0	0	NA	NA	NA	NA
656	ANKRD26P3	0.22509	0.450181	0	0	#NAME?	1	1
657	ANKRD27	118.708	114.084	123.331	1.08105	0.112439	0.759692	1
658	ANKRD28	166.387	143.475	189.298	1.31938	0.399855	0.15864	0.858264
659	ANKRD29	2.02635	3.52573	0.526968	0.149464	-2.74213	0.323775	1
660	ANKRD30A	0	0	0	NA	NA	NA	NA
661	ANKRD30B	0	0	0	NA	NA	NA	NA
662	ANKRD30BL	0	0	0	NA	NA	NA	NA
663	ANKRD31	0.271898	0.543796	0	0	#NAME?	1	1
664	ANKRD32	51.1728	48.4598	53.8857	1.11197	0.153115	0.669672	1
665	ANKRD33	0	0	0	NA	NA	NA	NA
666	ANKRD33B	6.07061	10.6529	1.48832	0.13971	-2.83949	0.032223	0.441118
667	ANKRD34A	1.23325	0.543796	1.9227	3.5357	1.822	0.642051	1
668	ANKRD34B	0.22509	0.450181	0	0	#NAME?	1	1
669	ANKRD34C	0	0	0	NA	NA	NA	NA
670	ANKRD35	1.56775	2.08157	1.05394	0.506318	-0.981884	0.841086	1
671	ANKRD36	183.542	146.774	220.31	1.50102	0.585941	0.0240811	0.380859
672	ANKRD36B	95.3948	69.449	121.341	1.74719	0.805039	0.012684	0.266214
673	ANKRD37	32.4524	32.614	32.2909	0.990092	-0.0143655	1	1
674	ANKRD39	232.645	202.232	263.059	1.30078	0.379377	0.128816	0.806846
675	ANKRD40	1379.65	1305.32	1453.98	1.11389	0.155605	0.413477	1
676	ANKRD42	17.5507	21.4751	13.6263	0.634516	-0.656271	0.303707	1
677	ANKRD44	3.15705	3.24488	3.06922	0.945866	-0.0802927	1	1
678	ANKRD45	0.263484	0	0.526968	Inf	Inf	0.999088	1
679	ANKRD46	11.0247	12.4536	9.59575	0.770519	-0.376097	0.656405	1
680	ANKRD49	89.8509	89.217	90.4849	1.01421	0.0203592	1	1
681	ANKRD5	101.363	98.8181	103.908	1.05151	0.0724645	0.870278	1
682	ANKRD50	162.07	153.728	170.413	1.10854	0.148656	0.564391	1
683	ANKRD52	415.783	434.559	397.007	0.913587	-0.130387	0.587541	1
684	ANKRD53	6.18049	3.3385	9.02249	2.70256	1.43433	0.25538	0.98003
685	ANKRD54	1179.4	1277.86	1080.94	0.845902	-0.241438	0.20921	0.92902
686	ANKRD55	0	0	0	NA	NA	NA	NA
687	ANKRD6	2.01687	1.53777	2.49596	1.6231	0.698753	0.842546	1
688	ANKRD63	0	0	0	NA	NA	NA	NA
689	ANKRD65	221.541	216.557	226.524	1.04602	0.0649115	0.771389	1
690	ANKRD7	0	0	0	NA	NA	NA	NA
691	ANKRD9	296.151	245.712	346.59	1.41055	0.496261	0.0427987	0.518437
692	ANKS1A	888.505	955.158	821.852	0.860436	-0.21686	0.275873	1
693	ANKS1B	0	0	0	NA	NA	NA	NA
694	ANKS3	86.8616	103.975	69.748	0.670814	-0.576015	0.0921944	0.721183
695	ANKS4B	842.293	922.337	762.248	0.826431	-0.275035	0.152579	0.853008
696	ANKS6	145.561	116.393	174.728	1.50119	0.586106	0.0411489	0.506229
697	ANKUB1	0.543796	1.08759	0	0	#NAME?	0.752934	1
698	ANKZF1	345.222	329.202	361.241	1.09733	0.133991	0.563847	1
699	ANLN	923.356	776.111	1070.6	1.37944	0.464085	0.0200941	0.344807
700	ANO1	0	0	0	NA	NA	NA	NA
701	ANO10	232.814	292.759	172.869	0.590483	-0.760032	0.00213818	0.0849066
702	ANO2	0.744159	0	1.48832	Inf	Inf	0.562674	1
703	ANO3	7.9907	8.92789	7.0535	0.790052	-0.339981	0.732159	1
704	ANO4	0	0	0	NA	NA	NA	NA
705	ANO5	2.3114	1.98795	2.63484	1.3254	0.406431	0.988099	1
706	ANO6	1550.76	1425.24	1676.28	1.17613	0.23405	0.222982	0.946848
707	ANO7	0.526968	0	1.05394	Inf	Inf	0.750735	1
708	ANO8	168.318	152.903	183.733	1.20163	0.264992	0.300691	1
709	ANO9	48.012	50.5235	45.5005	0.900582	-0.15107	0.796621	1
710	ANP32A	1522.14	1268.42	1775.86	1.40006	0.485484	0.00949309	0.222605
711	ANP32AP1	3.21018	2.2509	4.16945	1.85234	0.889353	0.753246	1
712	ANP32B	2435.4	2263.16	2607.63	1.1522	0.204396	0.267806	0.993379
713	ANP32C	14.1812	12.4715	15.8908	1.27417	0.349557	0.639054	1
714	ANP32D	0.263484	0	0.526968	Inf	Inf	0.999088	1
715	ANP32E	493.106	459.283	526.929	1.14729	0.198225	0.356986	1
716	ANPEP	3640.64	3106.85	4174.43	1.34362	0.426126	0.0193803	0.337099
717	ANTXR1	168.939	161.893	175.985	1.08704	0.120412	0.701333	1
718	ANTXR2	485.536	543.664	427.408	0.786162	-0.347101	0.0869145	0.706191
719	ANXA1	1.75445	2.98193	0.526968	0.17672	-2.50046	0.413347	1
720	ANXA10	0.722079	1.44416	0	0	#NAME?	0.576407	1
721	ANXA11	1058.88	989.584	1128.17	1.14004	0.189088	0.369769	1
722	ANXA13	473.015	509.704	436.327	0.856041	-0.224248	0.252783	0.979297
723	ANXA2	511.508	509.998	513.018	1.00592	0.00851807	1	1
724	ANXA2P1	1.02396	0.993977	1.05394	1.06032	0.0845028	1	1
725	ANXA2P3	0.969249	0.450181	1.48832	3.30604	1.72511	0.803551	1
726	ANXA3	224.905	252.265	197.544	0.783083	-0.352764	0.161741	0.861216
727	ANXA4	3808.94	4193.07	3424.81	0.816779	-0.291982	0.0921665	0.721183
728	ANXA5	4534.29	4527.56	4541.01	1.00297	0.00428141	0.963314	1
729	ANXA6	1507.72	1645.9	1369.53	0.832085	-0.265197	0.168297	0.869795
730	ANXA7	1839.07	1934.35	1743.79	0.901488	-0.14962	0.432097	1
731	ANXA8L1	0	0	0	NA	NA	NA	NA
732	ANXA8L2	0	0	0	NA	NA	NA	NA
733	ANXA9	486.771	440.122	533.42	1.21198	0.277368	0.163349	0.86298
734	AOAH	0.496988	0.993977	0	0	#NAME?	0.764234	1
735	AOC2	64.1906	87.8086	40.5727	0.462058	-1.11385	0.00394287	0.128551
736	AOC3	247.275	304.384	190.167	0.624759	-0.678628	0.00556976	0.160099
737	AOX1	346.726	417.162	276.29	0.662309	-0.594423	0.0065789	0.178883
738	AP1AR	85.8082	81.7332	89.8831	1.09971	0.137127	0.712045	1
739	AP1B1	1057.59	1105.81	1009.38	0.912797	-0.131634	0.549385	1
740	AP1B1P1	0	0	0	NA	NA	NA	NA
741	AP1G1	1803.54	1969.71	1637.37	0.831275	-0.266602	0.150346	0.848994
742	AP1G2	551.252	559.328	543.176	0.971122	-0.0422754	0.932894	1
743	AP1M1	2395.64	2280.42	2510.85	1.10105	0.138876	0.474216	1
744	AP1M2	337.937	233.192	442.682	1.89836	0.924752	3.60804e-05	0.00387958
745	AP1S1	411.302	429.514	393.091	0.9152	-0.12784	0.575921	1
746	AP1S2	422.505	417.509	427.5	1.02393	0.0341197	1	1
747	AP1S3	123.427	129.765	117.089	0.90232	-0.148289	0.592219	1
748	AP2A1	885.424	836.2	934.647	1.11773	0.160574	0.448132	1
749	AP2A2	1015.92	1142.35	889.478	0.778635	-0.36098	0.0650295	0.62844
750	AP2B1	1613.47	1604.43	1622.51	1.01127	0.0161711	0.995993	1
751	AP2M1	4615.43	4723.19	4507.67	0.95437	-0.0673789	0.727407	1
752	AP2S1	642.991	643.945	642.036	0.997035	-0.00428457	0.982287	1
753	AP3B1	505.825	519.747	491.904	0.946431	-0.0794314	0.698711	1
754	AP3B2	0	0	0	NA	NA	NA	NA
755	AP3D1	1081.61	1021.21	1142	1.11828	0.161278	0.392008	1
756	AP3M1	597.786	585.813	609.759	1.04088	0.0577988	0.749077	1
757	AP3M2	70.0624	72.5025	67.6224	0.932691	-0.100529	0.879852	1
758	AP3S1	421.182	426.478	415.886	0.975163	-0.0362843	0.888968	1
759	AP4E1	97.3814	98.6487	96.1141	0.974307	-0.0375518	0.924926	1
760	AP4M1	51.3668	58.814	43.9196	0.746755	-0.421292	0.328819	1
761	APAF1	163.392	160.2	166.585	1.03986	0.0563891	0.834633	1
762	APBA1	0	0	0	NA	NA	NA	NA
763	APBA2	21.1921	16.8976	25.4866	1.5083	0.592919	0.328132	1
764	APBA3	307.366	301.308	313.423	1.04021	0.0568707	0.801751	1
765	APBB1	6.32779	3.88229	8.77328	2.25982	1.17621	0.361626	1
766	APBB1IP	0	0	0	NA	NA	NA	NA
767	APBB2	565.437	436.939	693.935	1.58817	0.667367	0.00127699	0.0597335
768	APBB3	0.240337	0	0.480675	Inf	Inf	0.999087	1
769	APC	196.638	200.012	193.264	0.966263	-0.0495123	0.906632	1
770	APC2	3.11919	3.16916	3.06922	0.968465	-0.0462281	1	1
771	APCDD1	11.7368	18.4354	5.03821	0.273291	-1.87149	0.0319143	0.439658
772	APCDD1L	0.240337	0	0.480675	Inf	Inf	0.999087	1
773	APCS	0	0	0	NA	NA	NA	NA
774	APEH	1324.36	1342.83	1305.89	0.972494	-0.0402393	0.885591	1
775	APEX2	137.227	148.517	125.938	0.847968	-0.237918	0.39603	1
776	APH1A	1359.9	1379.44	1340.37	0.971677	-0.0414509	0.811838	1
777	APH1B	18.3232	15.81	20.8364	1.31793	0.398271	0.544698	1
778	API5	1182.03	1208.8	1155.26	0.955707	-0.065359	0.788244	1
779	APIP	500.4	537.62	463.181	0.861539	-0.215012	0.304328	1
780	APLF	49.6597	50.0375	49.2819	0.984899	-0.0219517	0.972829	1
781	APLN	0.263484	0	0.526968	Inf	Inf	0.999088	1
782	APLNR	0	0	0	NA	NA	NA	NA
783	APLP1	59.5521	58.7382	60.366	1.02771	0.0394357	0.912687	1
784	APOA1	72331.2	68789.4	75873	1.10297	0.1414	0.393647	1
785	APOA1BP	655.269	562.625	747.913	1.32933	0.410697	0.0526127	0.572465
786	APOA2	84102.6	69452.7	98752.5	1.42187	0.507786	0.00404249	0.130818
787	APOA4	216.243	196.17	236.315	1.20465	0.268609	0.270327	0.995958
788	APOA5	557.837	375.99	739.685	1.9673	0.976215	3.31155e-06	0.00051732
789	APOB	89021.7	87187.5	90855.9	1.04207	0.0594587	0.743928	1
790	APOBEC1	1.4978	1.98795	1.00764	0.506874	-0.9803	0.844411	1
791	APOBEC2	1.03079	0	2.06158	Inf	Inf	0.406794	1
792	APOBEC3B	81.2544	72.9389	89.5699	1.22801	0.296325	0.456136	1
793	APOBEC3C	609.048	609.306	608.791	0.999154	-0.00122172	0.950538	1
794	APOBEC3D	4.18101	4.23886	4.12316	0.972705	-0.039926	1	1
795	APOBEC3F	71.6933	81.2831	62.1035	0.76404	-0.38828	0.278699	1
796	APOBEC3H	0	0	0	NA	NA	NA	NA
797	APOBEC4	0	0	0	NA	NA	NA	NA
798	APOBR	1.41943	1.35054	1.48832	1.10201	0.140144	1	1
799	APOC1	1561.22	1081.95	2040.49	1.88594	0.915285	1.23313e-06	0.000237434
800	APOC3	1988.26	1717.67	2258.85	1.31507	0.395138	0.0329904	0.445949
801	APOC4	0.240337	0	0.480675	Inf	Inf	0.999087	1
802	APOD	4.52176	2.17518	6.86833	3.15759	1.65882	0.221468	0.945157
803	APOE	23244.9	22835.3	23654.6	1.03588	0.0508546	0.758191	1
804	APOF	69.6052	43.6056	95.6049	2.19249	1.13257	0.00228949	0.088786
805	APOH	19838.7	20243.6	19433.9	0.959998	-0.0588968	0.748874	1
806	APOL1	360.12	374.265	345.974	0.924409	-0.113397	0.599328	1
807	APOL2	2.04053	1.63139	2.44967	1.50159	0.586486	0.841934	1
808	APOL3	26.4965	28.3751	24.6178	0.867584	-0.204925	0.761426	1
809	APOL4	1.32793	2.17518	0.480675	0.220981	-2.178	0.645535	1
810	APOL5	0	0	0	NA	NA	NA	NA
811	APOL6	58.8053	72.1101	45.5005	0.630987	-0.664318	0.0989485	0.737393
812	APOM	754.486	656.14	852.832	1.29977	0.378258	0.0527128	0.57275
813	APOO	177.753	175.444	180.062	1.02632	0.0374831	0.812962	1
814	APOOL	170.841	150.941	190.74	1.26367	0.33762	0.246206	0.975491
815	APP	3899.71	3705.65	4093.77	1.10474	0.143702	0.467732	1
816	APPBP2	1305.19	1363.29	1247.09	0.914765	-0.128527	0.463073	1
817	APPL1	290.155	243.867	336.442	1.37961	0.464264	0.0520332	0.570986
818	APPL2	218.224	213.972	222.475	1.03974	0.0562229	0.842184	1
819	APRT	1863.14	1992.09	1734.2	0.870543	-0.200012	0.295465	1
820	APTX	285.881	320.1	251.661	0.786195	-0.34704	0.140895	0.83094
821	AQP10	7.20129	8.49561	5.90698	0.695298	-0.524297	0.708808	1
822	AQP11	62.9669	67.5546	58.3792	0.864178	-0.210599	0.54759	1
823	AQP12A	0	0	0	NA	NA	NA	NA
824	AQP12B	0	0	0	NA	NA	NA	NA
825	AQP2	0	0	0	NA	NA	NA	NA
826	AQP3	105.629	155.497	55.7621	0.358606	-1.47953	2.67162e-06	0.000429508
827	AQP4	11.8698	12.9974	10.7423	0.826493	-0.274926	0.725434	1
828	AQP5	0	0	0	NA	NA	NA	NA
829	AQP6	31.3617	42.478	20.2454	0.47661	-1.06912	0.0403226	0.499777
830	AQP7	14.338	14.3837	14.2922	0.993633	-0.0092148	1	1
831	AQP7P1	99.2937	106.846	91.7418	0.858639	-0.219877	0.474294	1
832	AQP8	2.01687	1.53777	2.49596	1.6231	0.698753	0.842546	1
833	AQP9	0.675271	1.35054	0	0	#NAME?	0.588866	1
834	AQPEP	3.22859	4.87627	1.5809	0.324204	-1.62503	0.365968	1
835	AQR	514.104	525.416	502.792	0.956941	-0.0634976	0.736323	1
836	AR	0	0	0	NA	NA	NA	NA
837	ARAF	594.002	519.804	668.199	1.28548	0.362309	0.0888517	0.714401
838	ARAP1	696.095	613.639	778.551	1.26875	0.343403	0.0970068	0.733401
839	ARAP2	5.10661	7.67097	2.54225	0.331412	-1.5933	0.231726	0.956634
840	ARAP3	6.8232	10.5772	3.06922	0.290174	-1.78501	0.128934	0.806846
841	ARC	4.12895	6.67699	1.5809	0.236769	-2.07845	0.172288	0.874477
842	ARCN1	5955.98	5599.59	6312.38	1.12729	0.172865	0.321014	1
843	AREG	275.156	322.132	228.179	0.70834	-0.497485	0.0315986	0.437382
844	ARF1	6277.06	6415.5	6138.62	0.956842	-0.0636473	0.756496	1
845	ARF3	3051.46	3093.41	3009.52	0.972883	-0.0396613	0.848893	1
846	ARF4	6107.44	6619.13	5595.74	0.845389	-0.242313	0.187787	0.895726
847	ARF5	1539.16	1430.45	1647.87	1.15199	0.204131	0.258345	0.982756
848	ARF6	7.09717	6.13319	8.06114	1.31435	0.394345	0.818651	1
849	ARFGAP1	1151.5	1155.44	1147.56	0.993186	-0.00986475	0.94667	1
850	ARFGAP2	410.615	376.476	444.755	1.18136	0.240451	0.248435	0.976776
851	ARFGAP3	780.31	861.032	699.589	0.812501	-0.299559	0.119795	0.789687
852	ARFGEF1	186.367	200.409	172.325	0.859866	-0.217817	0.431314	1
853	ARFGEF2	1611	1677.84	1544.15	0.920315	-0.1198	0.548663	1
854	ARFIP1	355.123	385.315	324.931	0.843287	-0.245904	0.266561	0.991682
855	ARFIP2	680.205	767.406	593.003	0.772737	-0.371951	0.0574274	0.59809
856	ARFRP1	456.164	484.917	427.411	0.88141	-0.182115	0.420597	1
857	ARG1	12.9558	3.88229	22.0293	5.67429	2.50444	0.00348522	0.121755
858	ARG2	1155.73	1293.48	1017.99	0.787015	-0.345537	0.0634093	0.622127
859	ARGFX	0	0	0	NA	NA	NA	NA
860	ARGLU1	237.529	215.657	259.402	1.20284	0.266448	0.233202	0.960116
861	ARHGAP1	1409.73	1488.21	1331.24	0.89452	-0.160814	0.426451	1
862	ARHGAP10	10.2658	12.9974	7.53417	0.579667	-0.786704	0.374732	1
863	ARHGAP11A	222.645	171.739	273.552	1.59283	0.671596	0.00890433	0.214901
864	ARHGAP11B	80.4087	63.5567	97.2607	1.5303	0.613813	0.0612391	0.612534
865	ARHGAP12	400.543	419.484	381.601	0.909691	-0.136552	0.517285	1
866	ARHGAP15	0.798866	0.543796	1.05394	1.93811	0.954649	0.994799	1
867	ARHGAP17	1916.12	2004.79	1827.45	0.911544	-0.133616	0.474797	1
868	ARHGAP18	3863.68	3826.92	3900.43	1.01921	0.0274507	0.885362	1
869	ARHGAP19	36.4767	36.1975	36.7558	1.01542	0.0220804	1	1
870	ARHGAP20	0	0	0	NA	NA	NA	NA
871	ARHGAP21	372.02	415.954	328.086	0.788754	-0.342353	0.123451	0.798216
872	ARHGAP22	0	0	0	NA	NA	NA	NA
873	ARHGAP23	6.26362	10.4657	2.06158	0.196985	-2.34384	0.0539335	0.578423
874	ARHGAP24	0.815694	1.63139	0	0	#NAME?	0.554074	1
875	ARHGAP25	0	0	0	NA	NA	NA	NA
876	ARHGAP26	97.3093	96.2863	98.3323	1.02125	0.0303352	0.943821	1
877	ARHGAP27	249.181	291.186	207.175	0.71149	-0.491086	0.0407579	0.50404
878	ARHGAP28	0	0	0	NA	NA	NA	NA
879	ARHGAP29	374.811	348.248	401.373	1.15255	0.204826	0.326747	1
880	ARHGAP30	2.01845	3.07554	0.96135	0.312579	-1.67771	0.579635	1
881	ARHGAP31	0.22509	0.450181	0	0	#NAME?	1	1
882	ARHGAP32	277.232	303.747	250.718	0.825418	-0.276803	0.24883	0.976776
883	ARHGAP33	27.7575	26.2757	29.2394	1.11279	0.154185	0.799687	1
884	ARHGAP35	1800.63	1774.59	1826.67	1.02935	0.0417266	0.885715	1
885	ARHGAP36	0.480675	0	0.96135	Inf	Inf	0.762071	1
886	ARHGAP39	19.3693	21.979	16.7596	0.762527	-0.391139	0.658758	1
887	ARHGAP4	0.992396	0.450181	1.53461	3.40888	1.7693	0.801581	1
888	ARHGAP40	21.6045	28.0943	15.1146	0.537997	-0.894331	0.145762	0.839245
889	ARHGAP42	46.752	57.1826	36.3214	0.635184	-0.654754	0.125099	0.803436
890	ARHGAP44	28.1604	25.7498	30.5711	1.18724	0.247607	0.651435	1
891	ARHGAP5	3632.02	4167.5	3096.54	0.743019	-0.428529	0.0159201	0.300806
892	ARHGAP6	0	0	0	NA	NA	NA	NA
893	ARHGAP9	13.3276	12.6408	14.0144	1.10866	0.148818	0.909813	1
894	ARHGDIA	18.8476	21.9611	15.7342	0.716457	-0.481047	0.484627	1
895	ARHGDIB	0.752573	0.543796	0.96135	1.76785	0.821996	0.994681	1
896	ARHGDIG	1.71447	1.89434	1.53461	0.810104	-0.303821	1	1
897	ARHGEF1	367.883	414.582	321.185	0.77472	-0.368253	0.117988	0.787491
898	ARHGEF10	1.91642	2.34452	1.48832	0.634807	-0.655609	0.867662	1
899	ARHGEF10L	902.578	906.702	898.454	0.990903	-0.0131843	0.970428	1
900	ARHGEF11	456.37	525.421	387.319	0.737159	-0.439952	0.0484629	0.54856
901	ARHGEF12	2916.59	2919.77	2913.41	0.997824	-0.00314343	1	1
902	ARHGEF15	0.263484	0	0.526968	Inf	Inf	0.999088	1
903	ARHGEF16	295.448	317.194	273.702	0.862883	-0.212763	0.351578	1
904	ARHGEF17	520.988	496.672	545.305	1.09792	0.134772	0.477921	1
905	ARHGEF18	384.442	401.383	367.501	0.915586	-0.127233	0.583997	1
906	ARHGEF19	54.1062	43.6592	64.5532	1.47857	0.564201	0.138752	0.826446
907	ARHGEF2	150.2	171.173	129.227	0.754951	-0.405544	0.141928	0.832939
908	ARHGEF25	0	0	0	NA	NA	NA	NA
909	ARHGEF3	328.731	288.333	369.128	1.28021	0.356386	0.117423	0.785621
910	ARHGEF33	0.737326	0.993977	0.480675	0.483588	-1.04815	1	1
911	ARHGEF35	0.722079	1.44416	0	0	#NAME?	0.576407	1
912	ARHGEF37	2.52963	4.05163	1.00764	0.248701	-2.00752	0.333136	1
913	ARHGEF38	0.526968	0	1.05394	Inf	Inf	0.750735	1
914	ARHGEF40	226.029	166.391	285.668	1.71685	0.779767	0.00155271	0.0683455
915	ARHGEF5	35.0394	38.3149	31.7639	0.829022	-0.270518	0.610936	1
916	ARHGEF6	0.263484	0	0.526968	Inf	Inf	0.999088	1
917	ARHGEF7	239.36	255.448	223.273	0.874046	-0.194219	0.470481	1
918	ARHGEF9	15.9214	17.9673	13.8755	0.772266	-0.37283	0.626719	1
919	ARID1A	1048.85	1014.22	1083.47	1.06828	0.0952899	0.606316	1
920	ARID1B	1020.25	1019.52	1020.97	1.00142	0.00204815	0.946056	1
921	ARID2	178.884	176.496	181.272	1.02706	0.0385267	0.825224	1
922	ARID3A	3191.91	3015.85	3367.96	1.11676	0.159313	0.414917	1
923	ARID3B	240.685	248.217	233.154	0.939312	-0.0903241	0.700855	1
924	ARID3C	0.488574	0.450181	0.526968	1.17057	0.22721	1	1
925	ARID4A	502.515	524.463	480.567	0.916303	-0.126104	0.615835	1
926	ARID4B	181.047	186.885	175.209	0.937519	-0.0930802	0.786431	1
927	ARID5A	4.94776	2.88831	7.00721	2.42605	1.27861	0.376653	1
928	ARID5B	326.909	291.743	362.075	1.24107	0.311589	0.158954	0.858264
929	ARIH1	547.408	601.904	492.912	0.818921	-0.288204	0.17628	0.878131
930	ARIH2	1184.55	1137.32	1231.78	1.08306	0.115111	0.56211	1
931	ARL1	2343.57	2399.69	2287.45	0.953228	-0.0691071	0.73133	1
932	ARL10	0.263484	0	0.526968	Inf	Inf	0.999088	1
933	ARL11	7.35955	3.43211	11.287	3.28864	1.71749	0.114852	0.779667
934	ARL13A	0	0	0	NA	NA	NA	NA
935	ARL13B	82.4471	77.6637	87.2305	1.12318	0.167592	0.669068	1
936	ARL14	2.26562	2.08157	2.44967	1.17684	0.234915	0.987977	1
937	ARL15	65.1725	62.4911	67.8539	1.08582	0.11878	0.793265	1
938	ARL16	243.683	240.586	246.78	1.02574	0.0366696	0.931356	1
939	ARL17A	660.586	641.092	680.08	1.06082	0.0851744	0.686519	1
940	ARL2	484.751	427.739	541.763	1.26657	0.340931	0.124941	0.803436
941	ARL2BP	2026.51	2030.79	2022.22	0.995782	-0.00609777	0.973542	1
942	ARL3	453.428	381.526	525.331	1.37692	0.461444	0.0326124	0.443373
943	ARL4A	56.2699	48.7806	63.7592	1.30706	0.386328	0.346308	1
944	ARL4C	4.59331	5.68301	3.5036	0.616504	-0.697817	0.639115	1
945	ARL4D	38.5688	42.5359	34.6016	0.81347	-0.297839	0.525968	1
946	ARL5A	840.172	794.761	885.582	1.11427	0.156104	0.418238	1
947	ARL5B	2015.92	1886	2145.84	1.13777	0.186213	0.320432	1
948	ARL5C	0	0	0	NA	NA	NA	NA
949	ARL6	9.29392	8.94579	9.64204	1.07783	0.10813	0.973684	1
950	ARL6IP1	3407.7	3075.02	3740.38	1.21637	0.282585	0.122866	0.796611
951	ARL6IP4	495.038	438.276	551.8	1.25902	0.332305	0.122351	0.795957
952	ARL6IP5	1045.48	1022.92	1068.05	1.04412	0.0622875	0.751479	1
953	ARL6IP6	756.482	690.973	821.99	1.18961	0.250491	0.202508	0.920996
954	ARL8A	468.496	444.949	492.043	1.10584	0.145144	0.486202	1
955	ARL8B	1693.76	1806.19	1581.34	0.875513	-0.1918	0.309773	1
956	ARL9	2.42182	3.88229	0.96135	0.247624	-2.01377	0.396257	1
957	ARMC1	611.423	640.151	582.695	0.910246	-0.135671	0.490148	1
958	ARMC10	208.298	205.026	211.569	1.03191	0.0453227	0.917358	1
959	ARMC12	3.48204	1.53777	5.4263	3.52868	1.81913	0.28611	1
960	ARMC2	0.962416	1.44416	0.480675	0.332841	-1.58709	0.817461	1
961	ARMC3	0	0	0	NA	NA	NA	NA
962	ARMC4	0.22509	0.450181	0	0	#NAME?	1	1
963	ARMC5	208.442	232.937	183.946	0.789682	-0.340657	0.144161	0.835886
964	ARMC6	334.453	306.671	362.235	1.18119	0.240236	0.283882	1
965	ARMC7	167.186	169.6	164.773	0.971539	-0.041656	0.845202	1
966	ARMC8	785.316	738.609	832.024	1.12648	0.171816	0.384714	1
967	ARMC9	161.446	152.212	170.68	1.12133	0.16521	0.554108	1
968	ARMCX1	0	0	0	NA	NA	NA	NA
969	ARMCX2	0	0	0	NA	NA	NA	NA
970	ARMCX3	136.657	126.181	147.134	1.16605	0.221628	0.448792	1
971	ARMCX4	0.271898	0.543796	0	0	#NAME?	1	1
972	ARMCX5	122.034	141.26	102.808	0.727792	-0.458402	0.109073	0.764528
973	ARMCX6	84.0055	92.89	75.1211	0.80871	-0.306306	0.367046	1
974	ARMS2	0	0	0	NA	NA	NA	NA
975	ARNT	789.906	808.98	770.832	0.952844	-0.0696875	0.733293	1
976	ARNT2	20.3528	32.7833	7.92226	0.241655	-2.04898	0.00198214	0.0808429
977	ARNTL	61.2897	70.3672	52.2122	0.741997	-0.430515	0.263703	0.989274
978	ARPC1A	859.766	901.579	817.953	0.907244	-0.140437	0.449655	1
979	ARPC1B	1207.89	1118.65	1297.14	1.15956	0.213572	0.304259	1
980	ARPC2	12051.9	12530.5	11573.3	0.92361	-0.114644	0.520486	1
981	ARPC3	2521.28	2566.8	2475.77	0.964537	-0.0520913	0.849955	1
982	ARPC5	1687	1772.34	1601.66	0.903699	-0.146085	0.415881	1
983	ARPC5L	277.029	285.405	268.652	0.941303	-0.0872684	0.724545	1
984	ACTRT3	27.653	34.8291	20.4769	0.587925	-0.766296	0.12388	0.799666
985	ARPP19	1278.45	1236.58	1320.33	1.06773	0.0945444	0.601606	1
986	ARPP21	0	0	0	NA	NA	NA	NA
987	ARR3	0	0	0	NA	NA	NA	NA
988	ARRB1	705.9	722.259	689.541	0.9547	-0.0668801	0.726608	1
989	ARRB2	948.88	906.792	990.968	1.09283	0.128067	0.471365	1
990	ARRDC1	319.592	303.43	335.755	1.10653	0.146045	0.513199	1
991	ARRDC2	82.4235	86.6852	78.1617	0.901673	-0.149323	0.628581	1
992	ARRDC3	39.1336	42.6116	35.6556	0.836758	-0.257118	0.55921	1
993	ARRDC4	11.6184	8.21476	15.0221	1.82867	0.870791	0.321974	1
994	ARRDC5	0	0	0	NA	NA	NA	NA
995	ARSA	192.998	176.5	209.497	1.18695	0.247265	0.350848	1
996	ARSB	924.357	961.883	886.832	0.921975	-0.117201	0.558243	1
997	ARSD	89.669	98.9117	80.4262	0.813112	-0.298475	0.368252	1
998	ARSE	629.233	660.255	598.212	0.906031	-0.142367	0.573802	1
999	ARSF	0.728912	0.450181	1.00764	2.23831	1.16241	0.994617	1
1000	ARSG	0.22509	0.450181	0	0	#NAME?	1	1
1001	ARSH	0.815694	1.63139	0	0	#NAME?	0.554074	1
1002	ARSI	493.176	445.809	540.542	1.21249	0.277978	0.183321	0.886786
1003	ARSJ	0.488574	0.450181	0.526968	1.17057	0.22721	1	1
1004	ARSK	55.9012	52.2127	59.5898	1.14129	0.190665	0.658319	1
1005	ART1	0	0	0	NA	NA	NA	NA
1006	ART3	0	0	0	NA	NA	NA	NA
1007	ART4	136.093	134.677	137.509	1.02103	0.030026	0.916427	1
1008	ART5	0.728912	0.450181	1.00764	2.23831	1.16241	0.994617	1
1009	ARTN	0.271898	0.543796	0	0	#NAME?	1	1
1010	ARV1	163.637	128.584	198.691	1.54523	0.627817	0.0247526	0.385586
1011	ARVCF	154.341	150.077	158.606	1.05683	0.0797449	0.819234	1
1012	ARX	0.480675	0	0.96135	Inf	Inf	0.762071	1
1013	AS3MT	150.373	127.719	173.026	1.35474	0.438014	0.111137	0.773007
1014	ASAH1	910.681	884.23	937.132	1.05983	0.0838294	0.733249	1
1015	ASAH2	275.553	249.849	301.257	1.20576	0.269937	0.259137	0.983736
1016	ASAH2B	239.265	210.914	267.616	1.26884	0.343508	0.164371	0.864917
1017	ASAP1	908.478	962.08	854.876	0.888571	-0.170441	0.409699	1
1018	ASAP2	1380.31	1486.83	1273.78	0.856708	-0.223125	0.259582	0.984746
1019	ASAP3	130.408	111.945	148.871	1.32986	0.411275	0.144571	0.836461
1020	ASB1	829.595	752.08	907.11	1.20614	0.270392	0.150582	0.849572
1021	ASB10	0	0	0	NA	NA	NA	NA
1022	ASB11	0	0	0	NA	NA	NA	NA
1023	ASB13	72.7141	71.3433	74.0849	1.03843	0.0544014	0.932644	1
1024	ASB14	0.263484	0	0.526968	Inf	Inf	0.999088	1
1025	ASB15	0	0	0	NA	NA	NA	NA
1026	ASB16	1.16385	1.80072	0.526968	0.292642	-1.77279	0.664723	1
1027	ASB17	0	0	0	NA	NA	NA	NA
1028	ASB18	0	0	0	NA	NA	NA	NA
1029	ASB2	0	0	0	NA	NA	NA	NA
1030	ASB4	10.0607	8.21476	11.9065	1.44941	0.535463	0.588686	1
1031	ASB5	0	0	0	NA	NA	NA	NA
1032	ASB6	175.379	166.823	183.936	1.10258	0.140884	0.614963	1
1033	ASB7	156.421	159.246	153.596	0.964524	-0.0521115	0.8443	1
1034	ASB8	205.584	204.688	206.481	1.00876	0.0125861	0.950281	1
1035	ASB9	47.8569	52.6629	43.0509	0.817481	-0.290743	0.511573	1
1036	ASB9P1	35.864	35.2036	36.5243	1.03752	0.0531367	0.982831	1
1037	ASCC1	102.812	115.341	90.282	0.782738	-0.353398	0.239016	0.96604
1038	ASCC2	669.866	695.766	643.965	0.925549	-0.111618	0.620716	1
1039	ASCC3	1237.1	1224.16	1250.03	1.02113	0.0301649	0.872263	1
1040	ASCL1	0	0	0	NA	NA	NA	NA
1041	ASCL3	0	0	0	NA	NA	NA	NA
1042	ASCL4	2.08682	1.63139	2.54225	1.55834	0.640008	0.840757	1
1043	ASF1A	1540.17	1655.88	1424.46	0.860244	-0.217183	0.222473	0.946511
1044	ASF1B	283.961	159.919	408.003	2.55131	1.35124	1.44373e-08	5.55969e-06
1045	ASGR1	5925.68	5409.97	6441.4	1.19065	0.251755	0.139546	0.828226
1046	ASGR2	1844.82	1641.51	2048.13	1.24771	0.319285	0.0957318	0.730854
1047	ASH1L	352.404	361.79	343.019	0.948117	-0.0768624	0.720339	1
1048	ASH2L	739.536	779.611	699.461	0.897192	-0.156511	0.420263	1
1049	ASIP	0	0	0	NA	NA	NA	NA
1050	ASL	1311.73	1346.89	1276.57	0.947785	-0.077369	0.667658	1
1051	ASMT	1.8165	2.62536	1.00764	0.383811	-1.38153	0.698094	1
1052	ASMTL	75.7375	70.7995	80.6755	1.13949	0.188391	0.618748	1
1053	ASNA1	701.294	754.094	648.494	0.859965	-0.21765	0.302225	1
1054	ASNS	372.838	500.54	245.135	0.489741	-1.02991	3.89407e-06	0.000575732
1055	ASNSD1	425.615	424.998	426.233	1.00291	0.00418584	1	1
1056	ASPA	1.04078	2.08157	0	0	#NAME?	0.413224	1
1057	ASPDH	17.3167	18.5111	16.1223	0.870952	-0.199334	0.784291	1
1058	ASPG	0	0	0	NA	NA	NA	NA
1059	ASPH	1821.58	1754.62	1888.55	1.07633	0.106126	0.556998	1
1060	ASPHD1	452.713	466.273	439.154	0.941839	-0.0864473	0.718273	1
1061	ASPHD2	1.2259	1.44416	1.00764	0.697737	-0.519244	1	1
1062	ASPM	213.967	172.56	255.375	1.47992	0.565522	0.0216966	0.359139
1063	ASPN	0.22509	0.450181	0	0	#NAME?	1	1
1064	ASPRV1	11.9976	16.073	7.92226	0.492894	-1.02065	0.225184	0.949537
1065	ASRGL1	275.137	264.776	285.498	1.07826	0.108705	0.677526	1
1066	ASS1	1450.71	1751.87	1149.56	0.656187	-0.60782	0.00151567	0.0676864
1067	ASTE1	65.6983	67.6482	63.7484	0.942352	-0.0856621	0.851253	1
1068	ASTL	0	0	0	NA	NA	NA	NA
1069	ASTN1	0	0	0	NA	NA	NA	NA
1070	ASTN2	0	0	0	NA	NA	NA	NA
1071	ASUN	447.433	484.824	410.043	0.845756	-0.241686	0.270848	0.996441
1072	ASXL1	503.795	543.281	464.31	0.854639	-0.226612	0.284115	1
1073	ASXL2	1035.44	1036.43	1034.45	0.998092	-0.00275494	0.974996	1
1074	ASXL3	0.240337	0	0.480675	Inf	Inf	0.999087	1
1075	ASZ1	0	0	0	NA	NA	NA	NA
1076	ATAD1	822.502	832.051	812.954	0.977049	-0.0334978	0.841868	1
1077	ATAD2	1592.13	1289.57	1894.7	1.46925	0.555083	0.00274281	0.102989
1078	ATAD2B	100.5	98.6267	102.374	1.03799	0.0537952	0.834106	1
1079	ATAD3A	639.737	583.99	695.483	1.19092	0.252072	0.195346	0.909074
1080	ATAD3B	207.959	206.096	209.821	1.01807	0.0258438	0.971868	1
1081	ATAD3C	6.53183	5.96386	7.09979	1.19047	0.25153	0.89355	1
1082	ATAD5	100.717	88.5038	112.931	1.276	0.351627	0.29917	1
1083	ATAT1	204.677	216.054	193.3	0.894685	-0.160548	0.525575	1
1084	ATCAY	0	0	0	NA	NA	NA	NA
1085	ATE1	183.429	179.539	187.318	1.04333	0.0611899	0.837621	1
1086	ATF1	259.275	267.593	250.956	0.937828	-0.092605	0.69111	1
1087	ATF2	773.495	801.787	745.203	0.929429	-0.105584	0.613521	1
1088	ATF3	329.182	403.469	254.894	0.631756	-0.66256	0.00366691	0.124418
1089	ATF4	4664.49	4645.29	4683.69	1.00827	0.0118752	0.886203	1
1090	ATF5	674.668	640.557	708.779	1.1065	0.146007	0.460243	1
1091	ATF6	728.09	796.245	659.935	0.828808	-0.270889	0.162436	0.861539
1092	ATF6B	682.418	724.065	640.771	0.884964	-0.17631	0.437591	1
1093	ATF7	439.798	433.284	446.311	1.03006	0.0427349	0.836856	1
1094	ATF7IP	153.571	143.324	163.818	1.14299	0.192817	0.489761	1
1095	ATF7IP2	131.358	135.354	127.362	0.940952	-0.0878072	0.693287	1
1096	ATG10	80.1357	75.6758	84.5957	1.11787	0.160753	0.684764	1
1097	ATG12	279.413	305.565	253.26	0.828825	-0.27086	0.261103	0.98555
1098	ATG13	1.76128	1.98795	1.53461	0.771955	-0.373411	1	1
1099	ATG14	125.134	114.855	135.412	1.17898	0.237541	0.462493	1
1100	ATG16L1	413.512	518.806	308.218	0.59409	-0.751247	0.000604376	0.0351153
1101	ATG16L2	25.7433	20.4812	31.0055	1.51385	0.598225	0.326869	1
1102	ATG2A	514.024	570.614	457.434	0.801653	-0.318951	0.144181	0.835886
1103	ATG2B	197.956	207.464	188.447	0.908334	-0.138706	0.57926	1
1104	ATG3	502.344	569.878	434.81	0.762989	-0.390267	0.062833	0.619253
1105	ATG4A	80.0616	72.9389	87.1842	1.19531	0.257379	0.519773	1
1106	ATG4B	2137.53	2296.21	1978.86	0.861793	-0.214587	0.263558	0.989274
1107	ATG4C	106.921	107.274	106.568	0.99342	-0.00952469	0.958259	1
1108	ATG4D	45.3756	41.1275	49.6237	1.20658	0.270926	0.499475	1
1109	ATG5	405.864	411.987	399.742	0.970278	-0.0435299	0.845758	1
1110	ATG7	66.2618	72.8411	59.6824	0.81935	-0.287448	0.461661	1
1111	ATG9A	961.945	842.73	1081.16	1.28293	0.35944	0.0761577	0.670902
1112	ATG9B	0	0	0	NA	NA	NA	NA
1113	ATHL1	168.036	145.909	190.163	1.30329	0.382162	0.130117	0.808752
1114	ATIC	6190.99	6510.39	5871.59	0.90188	-0.148993	0.423396	1
1115	ATL1	12.381	16.8398	7.92226	0.470449	-1.08789	0.243194	0.97084
1116	ATL2	1005.97	1053.03	958.902	0.910608	-0.135098	0.48266	1
1117	ATL3	0	0	0	NA	NA	NA	NA
1118	ATM	178.133	183.155	173.112	0.945166	-0.0813597	0.78236	1
1119	ATMIN	628.163	733.121	523.205	0.713668	-0.486675	0.0160266	0.300806
1120	ATN1	1718.94	1607.66	1830.22	1.13844	0.187058	0.31654	1
1121	ATOH1	0	0	0	NA	NA	NA	NA
1122	ATOH7	0.22509	0.450181	0	0	#NAME?	1	1
1123	ATOH8	4.08319	6.15109	2.01529	0.327631	-1.60986	0.336285	1
1124	ATOX1	857.435	858.229	856.642	0.998151	-0.0026694	0.983762	1
1125	ATP10A	11.5459	22.1304	0.96135	0.0434402	-4.52483	5.05731e-05	0.00504482
1126	ATP10B	0.722079	1.44416	0	0	#NAME?	0.576407	1
1127	ATP10D	47.3429	31.7136	62.9723	1.98565	0.989613	0.0185544	0.328602
1128	ATP11A	1406.13	1416.65	1395.6	0.985142	-0.0215962	0.898288	1
1129	ATP11B	227.984	253.357	202.611	0.799707	-0.322457	0.176702	0.878598
1130	ATP11C	230.358	239.682	221.033	0.922194	-0.116857	0.658449	1
1131	ATP12A	0.263484	0	0.526968	Inf	Inf	0.999088	1
1132	ATP13A1	581.096	531.216	630.976	1.1878	0.248288	0.209632	0.929537
1133	ATP13A2	546.658	488.238	605.077	1.23931	0.309534	0.146354	0.840024
1134	ATP13A3	800.806	851.302	750.309	0.881366	-0.182187	0.383478	1
1135	ATP13A4	0.271898	0.543796	0	0	#NAME?	1	1
1136	ATP13A5	0	0	0	NA	NA	NA	NA
1137	ATP1A1	30824.8	31580.2	30069.5	0.952162	-0.0707209	0.65795	1
1138	ATP1A2	0.985562	1.44416	0.526968	0.364896	-1.45444	0.815338	1
1139	ATP1A3	14.0419	24.0069	4.07686	0.169821	-2.55792	0.00151347	0.0676864
1140	ATP1A4	0	0	0	NA	NA	NA	NA
1141	ATP1B1	8778.39	8275.39	9281.4	1.12157	0.165516	0.410488	1
1142	ATP1B2	0.690518	0.900361	0.480675	0.533869	-0.905443	1	1
1143	ATP1B3	2294.52	2208.1	2380.94	1.07827	0.108725	0.596209	1
1144	ATP1B4	0	0	0	NA	NA	NA	NA
1145	ATP2A1	74.9475	71.5126	78.3824	1.09606	0.132332	0.738557	1
1146	ATP2A2	3965.3	3975	3955.61	0.99512	-0.00705804	0.954591	1
1147	ATP2A3	2.87676	1.53777	4.21574	2.74146	1.45494	0.49557	1
1148	ATP2B1	713.781	663.248	764.313	1.15238	0.204615	0.363155	1
1149	ATP2B2	29.5936	36.1218	23.0654	0.638546	-0.647137	0.193989	0.90669
1150	ATP2B3	0.503821	0	1.00764	Inf	Inf	0.756277	1
1151	ATP2B4	98.1293	122.914	73.3442	0.596709	-0.744899	0.0256771	0.394933
1152	ATP2C1	0.271898	0.543796	0	0	#NAME?	1	1
1153	ATP2C2	1.17226	2.34452	0	0	#NAME?	0.323144	1
1154	ATP4A	6.36669	3.52573	9.20766	2.61157	1.38491	0.250804	0.977386
1155	ATP4B	0	0	0	NA	NA	NA	NA
1156	ATP5A1	3815.71	3928.05	3703.38	0.942805	-0.0849693	0.686266	1
1157	ATP5B	8729.3	8123.25	9335.36	1.14922	0.20065	0.26697	0.99276
1158	ATP5C1	3071.92	3017.36	3126.48	1.03616	0.0512523	0.794875	1
1159	ATP5D	1638.36	1433.31	1843.4	1.28612	0.363023	0.061751	0.615724
1160	ATP5E	1460.88	1497.67	1424.09	0.950873	-0.0726755	0.693553	1
1161	ATP5EP2	0	0	0	NA	NA	NA	NA
1162	ATP5F1	1835.94	1925.08	1746.79	0.907384	-0.140214	0.389451	1
1163	ATP5G1	983.505	904.099	1062.91	1.17566	0.233467	0.241008	0.968896
1164	ATP5G2	2566.47	2470.54	2662.39	1.07766	0.107898	0.510622	1
1165	ATP5G3	3515.57	3382.64	3648.51	1.0786	0.109157	0.57575	1
1166	ATP5H	3168.25	2963.87	3372.64	1.13792	0.186397	0.319033	1
1167	ATP5I	735.222	706.788	763.657	1.08046	0.111649	0.576927	1
1168	ATP5J	98.7362	90.1531	107.319	1.19041	0.251461	0.454787	1
1169	ATP5L	6647.21	6742.21	6552.21	0.971819	-0.0412402	0.83045	1
1170	ATP5L2	32.138	28.6381	35.6378	1.24442	0.315474	0.570163	1
1171	ATP5S	183.272	167.233	199.31	1.19181	0.253156	0.334221	1
1172	ATP5SL	849.326	836.438	862.214	1.03082	0.0437875	0.760768	1
1173	ATP6AP1	2679.74	2651.17	2708.3	1.02155	0.0307582	0.842946	1
1174	ATP6AP1L	19.1011	19.2421	18.96	0.98534	-0.0213058	1	1
1175	ATP6AP2	1459.31	1197.8	1720.82	1.43665	0.52271	0.00765994	0.196802
1176	ATP6V0A1	620.651	786.182	455.12	0.578899	-0.788617	0.00015616	0.0122552
1177	ATP6V0A2	94.4574	89.0655	99.8492	1.12108	0.164884	0.634161	1
1178	ATP6V0A4	2.42972	4.33247	0.526968	0.121632	-3.0394	0.204845	0.924395
1179	ATP6V0B	562.433	552.008	572.857	1.03777	0.0534862	0.832853	1
1180	ATP6V0C	4976.19	4736.24	5216.15	1.10133	0.139243	0.457409	1
1181	ATP6V0CP3	0	0	0	NA	NA	NA	NA
1182	ATP6V0D1	584.397	635.426	533.367	0.839384	-0.252596	0.206372	0.925579
1183	ATP6V0D2	0.543796	1.08759	0	0	#NAME?	0.752934	1
1184	ATP6V0E1	6310.18	6739.36	5881	0.872636	-0.196549	0.251368	0.978007
1185	ATP6V0E2	571.849	540.299	603.4	1.11679	0.159355	0.436957	1
1186	ATP6V1A	430.967	434.38	427.554	0.984285	-0.0228525	0.876327	1
1187	ATP6V1B1	13.8472	12.2843	15.4101	1.25446	0.327066	0.689243	1
1188	ATP6V1B2	933.185	1021.52	844.853	0.827057	-0.273942	0.172113	0.874477
1189	ATP6V1C1	471.095	440.135	502.055	1.14069	0.189901	0.394667	1
1190	ATP6V1C2	0	0	0	NA	NA	NA	NA
1191	ATP6V1D	438.38	435.294	441.465	1.01418	0.0203072	0.926673	1
1192	ATP6V1E1	1724.16	1728.79	1719.54	0.994652	-0.00773568	0.928418	1
1193	ATP6V1E2	10.2942	9.84615	10.7423	1.09101	0.125668	0.972278	1
1194	ATP6V1F	10.1753	6.77061	13.58	2.00573	1.00413	0.288231	1
1195	ATP6V1G1	2484.72	2398.06	2571.39	1.07228	0.100683	0.612398	1
1196	ATP6V1G2	4.58594	4.70693	4.46495	0.948591	-0.0761422	1	1
1197	ATP6V1G3	0	0	0	NA	NA	NA	NA
1198	ATP6V1H	349.027	369.371	328.684	0.889847	-0.168371	0.463096	1
1199	ATP7A	53.2696	55.2882	51.2509	0.926977	-0.109395	0.815492	1
1200	ATP7B	674.975	638.904	711.047	1.11292	0.154346	0.43741	1
1201	ATP8A1	21.9426	23.0487	20.8364	0.904019	-0.145576	0.905036	1
1202	ATP8A2	0.465428	0.450181	0.480675	1.06774	0.0945573	1	1
1203	ATP8B1	91.0862	75.0205	107.152	1.4283	0.514302	0.136816	0.825932
1204	ATP8B2	456.862	388.074	525.651	1.35451	0.437775	0.0417936	0.511629
1205	ATP8B3	268.361	287	249.721	0.870107	-0.200736	0.385935	1
1206	ATP8B4	3.81129	5.60729	2.01529	0.359404	-1.47632	0.400392	1
1207	ATP9A	186.234	115.751	256.717	2.21783	1.14915	1.10618e-05	0.00133702
1208	ATP9B	122.071	107.63	136.512	1.26835	0.342948	0.23067	0.955276
1209	ATPAF1	538.5	521.294	555.706	1.06601	0.092224	0.602288	1
1210	ATPAF2	117.995	115.194	120.796	1.04863	0.0685081	0.887123	1
1211	ATPBD4	63.2787	67.2917	59.2657	0.880729	-0.183229	0.635709	1
1212	ATPIF1	287.366	333.076	241.656	0.725529	-0.462895	0.0586335	0.601397
1213	ATR	100.801	92.0654	109.538	1.18978	0.250695	0.432013	1
1214	ATRIP	44.7745	37.1516	52.3974	1.41037	0.496072	0.236917	0.962254
1215	ATRN	646.928	618.003	675.854	1.09361	0.129097	0.520392	1
1216	ATRNL1	0	0	0	NA	NA	NA	NA
1217	ATRX	454.983	417.465	492.502	1.17975	0.238475	0.285461	1
1218	ATXN1	404.444	447.053	361.836	0.809382	-0.305108	0.157639	0.857343
1219	ATXN10	1583.43	1424.36	1742.49	1.22335	0.290832	0.116933	0.784147
1220	ATXN1L	700.211	766.828	633.594	0.826252	-0.275346	0.18437	0.889304
1221	ATXN2	860.376	873.873	846.879	0.969109	-0.0452686	0.803955	1
1222	ATXN2L	3275.08	3657.88	2892.29	0.790701	-0.338796	0.0686577	0.640148
1223	ATXN3	132.369	129.012	135.725	1.05204	0.073188	0.783113	1
1224	ATXN3L	0.503821	0	1.00764	Inf	Inf	0.756277	1
1225	ATXN7	20.5258	19.3178	21.7338	1.12506	0.170004	0.868235	1
1226	ATXN7L1	53.1975	57.049	49.3459	0.864974	-0.209271	0.707957	1
1227	ATXN7L2	32.728	36.327	29.1291	0.801858	-0.318582	0.563356	1
1228	ATXN7L3	1337.67	1333.25	1342.09	1.00663	0.00953209	0.900745	1
1229	ATXN7L3B	1452.34	1460.13	1444.55	0.989333	-0.0154719	0.96764	1
1230	ATXN8OS	0.263484	0	0.526968	Inf	Inf	0.999088	1
1231	AUH	286.933	280.226	293.641	1.04787	0.0674626	0.748148	1
1232	AUP1	1205.65	1246.17	1165.13	0.934969	-0.0970093	0.63806	1
1233	AURKA	225.415	194.316	256.514	1.32009	0.400639	0.107745	0.759932
1234	AURKAIP1	1732.71	1567.74	1897.69	1.21047	0.275565	0.138801	0.826446
1235	AURKAPS1	28.4429	31.6021	25.2837	0.800062	-0.321817	0.530414	1
1236	AURKB	64.3763	54.5751	74.1775	1.35918	0.442738	0.235013	0.960447
1237	AURKC	5.04193	4.42609	5.65777	1.27828	0.354201	0.88483	1
1238	AUTS2	1.30269	0.543796	2.06158	3.79109	1.92261	0.634513	1
1239	AVEN	132.653	127.924	137.381	1.07393	0.102895	0.725216	1
1240	AVIL	21.21	20.6863	21.7338	1.05064	0.0712635	0.96038	1
1241	AVL9	309.976	305.717	314.235	1.02786	0.039648	0.849509	1
1242	AVP	0	0	0	NA	NA	NA	NA
1243	AVPI1	438.267	497.255	379.279	0.762746	-0.390726	0.0731601	0.658781
1244	AVPR1A	0	0	0	NA	NA	NA	NA
1245	AVPR1B	0.263484	0	0.526968	Inf	Inf	0.999088	1
1246	AVPR2	0.271898	0.543796	0	0	#NAME?	1	1
1247	AWAT1	0	0	0	NA	NA	NA	NA
1248	AWAT2	0	0	0	NA	NA	NA	NA
1249	AXDND1	0	0	0	NA	NA	NA	NA
1250	AXIN1	294.408	294.15	294.666	1.00176	0.00253061	0.975995	1
1251	AXIN2	770.034	804.813	735.255	0.913573	-0.130408	0.511982	1
1252	AXL	30.4492	43.5656	17.3328	0.397856	-1.32968	0.0145778	0.286011
1253	AZGP1	1602.19	1400.69	1803.7	1.28772	0.364817	0.0612069	0.612534
1254	AZI1	106.86	90.4918	123.228	1.36176	0.44547	0.161207	0.861216
1255	AZI2	66.9522	70.2378	63.6667	0.906444	-0.14171	0.652352	1
1256	AZIN1	1782.67	1836.08	1729.25	0.941817	-0.086481	0.63402	1
1257	AZU1	0.271898	0.543796	0	0	#NAME?	1	1
1258	B2M	5406.25	5147.86	5664.65	1.10039	0.138013	0.44072	1
1259	B3GALNT1	0	0	0	NA	NA	NA	NA
1260	B3GALNT2	419.344	380.193	458.495	1.20595	0.270173	0.22073	0.944472
1261	B3GALT1	0.22509	0.450181	0	0	#NAME?	1	1
1262	B3GALT2	0	0	0	NA	NA	NA	NA
1263	B3GALT4	3.96536	4.5197	3.41102	0.7547	-0.406026	0.910405	1
1264	B3GALT5	0	0	0	NA	NA	NA	NA
1265	B3GALT6	631.122	653.8	608.445	0.930629	-0.103722	0.642155	1
1266	B3GALTL	111.201	107.559	114.843	1.06772	0.0945347	0.787488	1
1267	B3GAT1	0.263484	0	0.526968	Inf	Inf	0.999088	1
1268	B3GAT2	0	0	0	NA	NA	NA	NA
1269	B3GAT3	113.968	100.075	127.86	1.27764	0.353487	0.264218	0.989676
1270	B3GNT1	1400.66	1164.76	1636.56	1.40506	0.490632	0.0118674	0.255542
1271	B3GNT2	181.527	173.803	189.252	1.08889	0.122855	0.709791	1
1272	B3GNT3	454.343	620.722	287.965	0.46392	-1.10805	2.51363e-07	6.60685e-05
1273	B3GNT4	0	0	0	NA	NA	NA	NA
1274	B3GNT5	0.80728	1.08759	0.526968	0.484527	-1.04535	1	1
1275	B3GNT6	0	0	0	NA	NA	NA	NA
1276	B3GNT8	0	0	0	NA	NA	NA	NA
1277	B3GNTL1	140.943	128.677	153.208	1.19064	0.251734	0.41396	1
1278	B4GALNT1	138.547	135.127	141.967	1.05062	0.0712412	0.843515	1
1279	B4GALNT2	1.00922	1.53777	0.480675	0.312579	-1.67771	0.813219	1
1280	B4GALNT3	77.4467	76.8528	78.0406	1.01546	0.0221267	0.866962	1
1281	B4GALNT4	184.677	127.866	241.489	1.8886	0.917318	0.00033319	0.0221578
1282	B4GALT1	793.288	799.731	786.844	0.983885	-0.0234378	0.922252	1
1283	B4GALT2	1103.04	1009.34	1196.73	1.18565	0.245677	0.223345	0.947002
1284	B4GALT3	593.097	626.592	559.601	0.893087	-0.163128	0.416498	1
1285	B4GALT4	451.38	397.742	505.017	1.26971	0.344499	0.0916374	0.721183
1286	B4GALT5	864.695	943.91	785.481	0.832156	-0.265074	0.156582	0.857343
1287	B4GALT6	21.3798	21.1007	21.6589	1.02646	0.0376725	1	1
1288	B4GALT7	139.712	120.106	159.318	1.32648	0.4076	0.163807	0.86394
1289	NCR3LG1	582.519	515.793	649.246	1.25873	0.331974	0.121197	0.792617
1290	B9D1	260.259	243.426	277.091	1.13829	0.186873	0.369656	1
1291	B9D2	35.7646	43.4541	28.0751	0.646086	-0.630201	0.199278	0.915606
1292	BAALC	0.240337	0	0.480675	Inf	Inf	0.999087	1
1293	BAAT	7.70144	5.32645	10.0764	1.89177	0.919738	0.414534	1
1294	BABAM1	429.097	424.847	433.347	1.02001	0.0285794	0.872385	1
1295	BACE1	125.454	127.755	123.153	0.963979	-0.0529261	0.907647	1
1296	BACE2	0	0	0	NA	NA	NA	NA
1297	BACH1	128.385	163.355	93.4153	0.571854	-0.80628	0.0046333	0.141555
1298	BACH2	0.480675	0	0.96135	Inf	Inf	0.762071	1
1299	BAD	417.768	422.207	413.329	0.978973	-0.0306597	0.831314	1
1300	BAG1	277.486	291.97	263.002	0.900782	-0.15075	0.546173	1
1301	BAG2	866.635	942.765	790.505	0.838496	-0.254123	0.166573	0.868771
1302	BAG3	1191.25	1363.91	1018.6	0.746825	-0.421158	0.0309979	0.434626
1303	BAG4	459.411	426.723	492.1	1.15321	0.205652	0.350636	1
1304	BAG5	9.17978	9.86405	8.49552	0.861262	-0.215477	0.953256	1
1305	BAG6	3620.91	3411.67	3830.15	1.12266	0.166925	0.395543	1
1306	BAHCC1	155.625	115.02	196.23	1.70605	0.770658	0.00445568	0.139305
1307	BAHD1	323.476	335.839	311.112	0.926374	-0.110333	0.611968	1
1308	BAI1	0.488574	0.450181	0.526968	1.17057	0.22721	1	1
1309	BAI2	0	0	0	NA	NA	NA	NA
1310	BAI3	0	0	0	NA	NA	NA	NA
1311	BAIAP2	723.239	782.224	664.253	0.849186	-0.235848	0.27202	0.998949
1312	BAIAP2L1	1099.44	1190.52	1008.35	0.846979	-0.239601	0.177455	0.878598
1313	BAIAP2L2	405.514	473.016	338.012	0.71459	-0.484812	0.0226412	0.366128
1314	BAIAP3	17.252	14.0093	20.4946	1.46293	0.548864	0.410512	1
1315	BAK1	367.617	373.721	361.512	0.967331	-0.0479188	0.832249	1
1316	BAMBI	459.784	529.842	389.726	0.735552	-0.443101	0.0329716	0.445949
1317	BANF1	547.997	565.603	530.39	0.937743	-0.0927351	0.628745	1
1318	BANF2	4.20625	5.87024	2.54225	0.433074	-1.20731	0.437584	1
1319	BANK1	1.4594	2.43813	0.480675	0.197149	-2.34264	0.5269	1
1320	BANP	97.6566	119.259	76.0539	0.637719	-0.649008	0.0438959	0.522556
1321	BAP1	1393.83	1503.28	1284.38	0.854385	-0.227041	0.262506	0.988367
1322	BARD1	215.419	196.023	234.816	1.1979	0.260512	0.295373	1
1323	BARHL1	0	0	0	NA	NA	NA	NA
1324	BARHL2	0	0	0	NA	NA	NA	NA
1325	BARX1	0.271898	0.543796	0	0	#NAME?	1	1
1326	BARX2	3.54097	6.60127	0.480675	0.0728155	-3.77961	0.0712308	0.648042
1327	BASP1	0	0	0	NA	NA	NA	NA
1328	BASP1P1	0	0	0	NA	NA	NA	NA
1329	BATF	26.913	33.1	20.7261	0.626167	-0.67538	0.254533	0.979938
1330	BATF2	4.64012	5.77663	3.5036	0.606513	-0.721389	0.63772	1
1331	BATF3	1.02447	1.08759	0.96135	0.883925	-0.178004	1	1
1332	BAX	2580.41	2554.45	2606.37	1.02033	0.0290297	0.851799	1
1333	BAZ1A	610.299	574.027	646.572	1.12638	0.171692	0.430366	1
1334	BAZ1B	430.886	449.825	411.948	0.915795	-0.126904	0.585203	1
1335	BAZ2A	1220.11	1237.21	1203.01	0.972364	-0.0404314	0.856287	1
1336	BAZ2B	52.1452	56.3579	47.9325	0.850501	-0.233615	0.559403	1
1337	BBC3	96.0708	95.1409	97.0007	1.01955	0.0279287	0.906981	1
1338	BBOX1	0.22509	0.450181	0	0	#NAME?	1	1
1339	BBS1	169.206	178.88	159.532	0.891836	-0.16515	0.539416	1
1340	BBS10	48.2381	45.7807	50.6954	1.10735	0.147113	0.745962	1
1341	BBS12	29.8828	22.7321	37.0336	1.62913	0.704105	0.228628	0.954334
1342	BBS2	549.865	535.859	563.87	1.05227	0.0735086	0.745081	1
1343	BBS4	154.88	138.444	171.317	1.23745	0.30737	0.240099	0.968525
1344	BBS7	60.0817	57.597	62.5664	1.08628	0.119396	0.837313	1
1345	BBS9	106.916	118.68	95.1528	0.801761	-0.318755	0.293703	1
1346	BBX	651.456	672.574	630.339	0.937204	-0.0935645	0.653795	1
1347	BCAM	2727.17	2911.28	2543.06	0.873522	-0.195085	0.296891	1
1348	BCAN	0.271898	0.543796	0	0	#NAME?	1	1
1349	BCAP29	381.589	409.192	353.985	0.865083	-0.20909	0.32981	1
1350	BCAP31	186.712	196.624	176.8	0.899179	-0.15332	0.527061	1
1351	BCAR1	17.5018	16.6347	18.369	1.10426	0.143084	0.861729	1
1352	BCAR3	135.668	152.323	119.012	0.781312	-0.356029	0.224794	0.948838
1353	BCAS1	16.8333	13.6527	20.014	1.46593	0.551819	0.403199	1
1354	BCAS2	1183.49	1173.07	1193.91	1.01777	0.0254062	0.934502	1
1355	BCAS3	189.127	169.016	209.237	1.23797	0.307979	0.231399	0.956634
1356	BCAS4	65.8461	45.9501	85.7422	1.86599	0.899938	0.0194627	0.337823
1357	BCAT1	999.144	1157.27	841.018	0.726726	-0.460516	0.0214018	0.356364
1358	BCAT2	54.7374	49.155	60.3197	1.22713	0.29529	0.452453	1
1359	BCCIP	1624.25	1755.25	1493.24	0.850733	-0.233222	0.216854	0.940542
1360	BCDIN3D	11.6837	11.5712	11.7962	1.01945	0.0277905	1	1
1361	BCHE	0	0	0	NA	NA	NA	NA
1362	BCKDHA	112.786	107.087	118.485	1.10644	0.14593	0.59935	1
1363	BCKDHB	84.8223	82.1077	87.5368	1.06612	0.0923727	0.847973	1
1364	BCKDK	993.67	906.354	1080.99	1.19268	0.254203	0.199074	0.915431
1365	BCL10	183.863	199.588	168.137	0.842421	-0.247386	0.323902	1
1366	BCL11A	0.503821	0	1.00764	Inf	Inf	0.756277	1
1367	BCL11B	2.48494	4.96988	0	0	#NAME?	0.0671091	0.635459
1368	BCL2	1.47414	1.89434	1.05394	0.556361	-0.845907	0.845573	1
1369	BCL2A1	1.56775	2.08157	1.05394	0.506318	-0.981884	0.841086	1
1370	BCL2L1	12999.3	13000.2	12998.3	0.999852	-0.000213693	1	1
1371	BCL2L10	0	0	0	NA	NA	NA	NA
1372	BCL2L11	298.516	296.606	300.427	1.01288	0.0184693	0.998031	1
1373	BCL2L12	655.381	633.48	677.282	1.06915	0.0964576	0.584146	1
1374	BCL2L13	142.044	130.835	153.254	1.17136	0.228183	0.470221	1
1375	BCL2L14	1.76128	1.98795	1.53461	0.771955	-0.373411	1	1
1376	BCL2L15	0	0	0	NA	NA	NA	NA
1377	BCL3	107.812	159.972	55.6518	0.347884	-1.52332	1.84281e-06	0.000328118
1378	BCL6	1063.94	1102.39	1025.49	0.930243	-0.10432	0.601975	1
1379	BCL6B	0	0	0	NA	NA	NA	NA
1380	BCL7A	40.8796	41.9342	39.825	0.949702	-0.0744534	0.924632	1
1381	BCL7B	309.693	310.133	309.254	0.997164	-0.00409664	0.910844	1
1382	BCL7C	383.344	346.113	420.575	1.21514	0.28112	0.199342	0.915647
1383	BCL9	34.6208	47.693	21.5486	0.451819	-1.14618	0.0202762	0.346495
1384	BCL9L	803.782	797.016	810.547	1.01698	0.0242858	0.913243	1
1385	BCLAF1	1565.64	1515.43	1615.84	1.06626	0.0925582	0.584532	1
1386	BCMO1	0.915609	1.35054	0.480675	0.355913	-1.49041	0.821919	1
1387	BCO2	3.58936	0.993977	6.18473	6.22221	2.63743	0.152193	0.852433
1388	BCOR	567.437	590.711	544.163	0.921199	-0.118415	0.573187	1
1389	BCORL1	5.52312	4.5197	6.52653	1.44402	0.530089	0.70973	1
1390	BCR	576.012	559.077	592.946	1.06058	0.0848527	0.713422	1
1391	BCRP2	1.19434	0.900361	1.48832	1.65302	0.725106	0.991711	1
1392	BCRP3	274.691	280.417	268.966	0.959163	-0.0601515	0.816823	1
1393	BCS1L	404.257	404.027	404.488	1.00114	0.0016473	0.976923	1
1394	BDH1	675.983	737.923	614.042	0.832123	-0.265132	0.210968	0.930834
1395	BDH2	143.78	137.717	149.843	1.08805	0.121751	0.720213	1
1396	BDKRB1	0.503821	0	1.00764	Inf	Inf	0.756277	1
1397	BDKRB2	1.80967	3.61934	0	0	#NAME?	0.162742	0.861539
1398	BDNF	0	0	0	NA	NA	NA	NA
1399	BDP1	290.28	331.793	248.767	0.749765	-0.415489	0.102703	0.74623
1400	BEAN1	4.14206	3.3385	4.94563	1.48139	0.566956	0.778671	1
1401	BECN1	1234.52	1252.27	1216.77	0.971647	-0.0414961	0.853134	1
1402	BEGAIN	0.263484	0	0.526968	Inf	Inf	0.999088	1
1403	BEND2	0	0	0	NA	NA	NA	NA
1404	BEND3	117.507	130.996	104.019	0.794062	-0.332676	0.310116	1
1405	BEND4	0.271898	0.543796	0	0	#NAME?	1	1
1406	BEND5	0.240337	0	0.480675	Inf	Inf	0.999087	1
1407	BEND6	0.705765	0.450181	0.96135	2.13548	1.09456	0.994553	1
1408	BEND7	0	0	0	NA	NA	NA	NA
1409	BEST1	4.10473	5.23283	2.97664	0.568838	-0.81391	0.618479	1
1410	BEST2	0	0	0	NA	NA	NA	NA
1411	BEST3	0	0	0	NA	NA	NA	NA
1412	BEST4	1.27271	1.53777	1.00764	0.655261	-0.609858	1	1
1413	BET1	528.416	581.311	475.522	0.818016	-0.289799	0.18056	0.882309
1414	BET1L	639.21	707.154	571.265	0.807838	-0.307863	0.142694	0.833536
1415	BET3L	0.271898	0.543796	0	0	#NAME?	1	1
1416	BEX1	154.868	139.085	170.651	1.22695	0.295082	0.294635	1
1417	BEX2	0.263484	0	0.526968	Inf	Inf	0.999088	1
1418	BEX4	0	0	0	NA	NA	NA	NA
1419	BEX5	0.240337	0	0.480675	Inf	Inf	0.999087	1
1420	BFAR	1176.54	1131.72	1221.36	1.0792	0.109969	0.61103	1
1421	BFSP1	15.0679	17.5171	12.6187	0.720363	-0.473204	0.517955	1
1422	BFSP2	0	0	0	NA	NA	NA	NA
1423	BGLAP	47.3962	49.5873	45.205	0.911625	-0.133488	0.768452	1
1424	BGN	1.66925	3.3385	0	0	#NAME?	0.175324	0.878131
1425	BHLHA15	73.6649	66.6543	80.6755	1.21036	0.275433	0.449187	1
1426	BHLHB9	0	0	0	NA	NA	NA	NA
1427	BHLHE22	0.744159	0	1.48832	Inf	Inf	0.562674	1
1428	BHLHE23	0	0	0	NA	NA	NA	NA
1429	BHLHE40	2101.53	2439.42	1763.63	0.722974	-0.467985	0.0121703	0.260829
1430	BHLHE41	3.21227	3.88229	2.54225	0.654833	-0.610801	0.781995	1
1431	BHMT	8.44669	13.3898	3.5036	0.261663	-1.93422	0.0737998	0.661283
1432	BHMT2	419.549	482.101	356.997	0.740503	-0.433422	0.0541502	0.579995
1433	BICC1	64.1806	54.2764	74.0849	1.36496	0.448855	0.249102	0.976776
1434	BICD1	6.60229	6.15109	7.0535	1.14671	0.197497	0.893365	1
1435	BICD2	618.017	582.96	653.074	1.12027	0.163848	0.412499	1
1436	BIK	53.8443	41.0738	66.6147	1.62183	0.697623	0.0938569	0.72693
1437	BIN1	1.4126	2.34452	0.480675	0.205021	-2.28616	0.53272	1
1438	BIN2	0	0	0	NA	NA	NA	NA
1439	BIN3	205.489	228.236	182.743	0.800675	-0.320711	0.250383	0.977386
1440	BIRC2	1287.97	1322.83	1253.11	0.94729	-0.0781217	0.703375	1
1441	BIRC3	263.701	358.459	168.942	0.471301	-1.08528	5.2559e-06	0.000719277
1442	BIRC5	1001.98	814.792	1189.17	1.45948	0.545452	0.00508393	0.149
1443	BIRC6	644.913	649.517	640.309	0.985824	-0.0205986	0.943029	1
1444	BIRC7	2.70845	3.88229	1.53461	0.395285	-1.33904	0.526275	1
1445	BIRC8	0	0	0	NA	NA	NA	NA
1446	BLCAP	3.15863	4.78265	1.53461	0.32087	-1.63994	0.370027	1
1447	BLID	0.263484	0	0.526968	Inf	Inf	0.999088	1
1448	BLK	0	0	0	NA	NA	NA	NA
1449	BLM	42.6046	28.393	56.8161	2.00106	1.00076	0.0202454	0.346396
1450	BLMH	289.571	307.071	272.07	0.886017	-0.174593	0.449182	1
1451	BLNK	1.49096	2.98193	0	0	#NAME?	0.229453	0.954747
1452	BLOC1S1	365.58	349.478	381.683	1.09215	0.127174	0.613357	1
1453	BLOC1S2	388.442	436.127	340.758	0.781326	-0.356003	0.0908139	0.719516
1454	BLOC1S3	51.6892	41.5419	61.8365	1.48853	0.573893	0.181179	0.882916
1455	BLVRA	965.79	887.932	1043.65	1.17537	0.233112	0.229056	0.954747
1456	BLVRB	444.701	462.974	426.429	0.921064	-0.118627	0.56573	1
1457	BLZF1	316.279	351.72	280.837	0.798466	-0.324697	0.159651	0.858611
1458	BMF	80.2941	83.8685	76.7197	0.914762	-0.128531	0.752799	1
1459	BMP1	66.0112	60.9712	71.0512	1.16532	0.220729	0.535611	1
1460	BMP10	0	0	0	NA	NA	NA	NA
1461	BMP15	0	0	0	NA	NA	NA	NA
1462	BMP2	1.68236	0	3.36472	Inf	Inf	0.167474	0.868959
1463	BMP2K	219.369	191.182	247.556	1.29487	0.372807	0.128753	0.806846
1464	BMP3	0.526968	0	1.05394	Inf	Inf	0.750735	1
1465	BMP4	1608.55	1644.77	1572.32	0.955955	-0.064986	0.806606	1
1466	BMP5	0	0	0	NA	NA	NA	NA
1467	BMP6	8.68598	13.8221	3.5499	0.256828	-1.96112	0.0544736	0.582039
1468	BMP7	0.737326	0.993977	0.480675	0.483588	-1.04815	1	1
1469	BMP8A	1.00081	0.993977	1.00764	1.01375	0.0197004	1	1
1470	BMP8B	24.7789	25.2817	24.276	0.960221	-0.0585622	0.916927	1
1471	BMPER	0	0	0	NA	NA	NA	NA
1472	BMPR1A	429.581	460.692	398.471	0.864941	-0.209327	0.312298	1
1473	BMPR1B	0.713665	0.900361	0.526968	0.585285	-0.77279	1	1
1474	BMPR2	815.57	778.465	852.676	1.09533	0.131364	0.513664	1
1475	BMS1	1179.46	1158.26	1200.66	1.0366	0.0518633	0.802775	1
1476	BMX	0.271898	0.543796	0	0	#NAME?	1	1
1477	BNC1	0	0	0	NA	NA	NA	NA
1478	BNC2	0	0	0	NA	NA	NA	NA
1479	BNIP1	76.0794	98.1628	53.9961	0.550067	-0.862322	0.0136893	0.275432
1480	BNIP2	479.898	462.992	496.803	1.07303	0.101687	0.626514	1
1481	BNIP3	3297.5	3630.05	2964.95	0.816778	-0.291983	0.101736	0.744763
1482	BNIP3L	1540.88	1468.92	1612.84	1.09798	0.134848	0.48923	1
1483	BNIPL	1.74655	2.53175	0.96135	0.379718	-1.397	0.70295	1
1484	BOC	0	0	0	NA	NA	NA	NA
1485	BOD1	618.327	597.633	639.02	1.06925	0.0966003	0.647059	1
1486	BOD1L1	204.136	192.943	215.329	1.11603	0.15837	0.488456	1
1487	BOK	191.76	168.151	215.369	1.2808	0.357047	0.165968	0.868771
1488	BOLA1	6.89783	7.40802	6.38765	0.862262	-0.213802	0.941877	1
1489	BOLA2B	2162.75	2050.54	2274.95	1.10944	0.149828	0.408224	1
1490	BOLA3	1051.03	1101.37	1000.69	0.908592	-0.138296	0.527002	1
1491	BOLL	0	0	0	NA	NA	NA	NA
1492	BOP1	528.539	523.879	533.2	1.01779	0.0254411	0.852237	1
1493	BORA	57.3942	56.1886	58.5999	1.04291	0.060621	0.88684	1
1494	BPGM	41.3797	38.1277	44.6318	1.17059	0.227233	0.614113	1
1495	BPHL	403.449	431.603	375.295	0.869537	-0.20168	0.333734	1
1496	BPI	0	0	0	NA	NA	NA	NA
1497	BPIFA2	0	0	0	NA	NA	NA	NA
1498	BPIFA3	0	0	0	NA	NA	NA	NA
1499	BPIFA4P	0	0	0	NA	NA	NA	NA
1500	BPIFB1	30.1548	39.0101	21.2994	0.545996	-0.873038	0.0855551	0.700993
1501	BPIFB2	6337.8	6024.31	6651.3	1.10408	0.142841	0.406338	1
1502	BPIFB3	0.503821	0	1.00764	Inf	Inf	0.756277	1
1503	BPIFB4	0	0	0	NA	NA	NA	NA
1504	BPIFB6	4.71165	7.40802	2.01529	0.272041	-1.8781	0.200246	0.917981
1505	BPIFC	0	0	0	NA	NA	NA	NA
1506	BPNT1	136.959	132.292	141.625	1.07055	0.0983497	0.728084	1
1507	BPTF	1045.76	1001.88	1089.63	1.08759	0.121133	0.521102	1
1508	BRAF	427.535	443.425	411.645	0.928331	-0.107289	0.662014	1
1509	BRAP	388.262	433.677	342.848	0.790561	-0.339052	0.129882	0.808334
1510	BRAT1	359.949	359.886	360.013	1.00035	0.000511079	0.977976	1
1511	BRCA1	166.469	133.139	199.798	1.50067	0.585607	0.0289393	0.416338
1512	BRCA2	138.745	114.53	162.96	1.42286	0.508791	0.0595635	0.606215
1513	BRCC3	66.8311	55.5112	78.1509	1.40784	0.493483	0.142649	0.833536
1514	BRD1	434.677	438.379	430.976	0.983111	-0.0245741	0.960317	1
1515	BRD2	2197.2	2682.18	1712.22	0.638368	-0.647539	0.000418016	0.0261059
1516	BRD3	589.849	529.405	650.292	1.22834	0.296715	0.144242	0.835886
1517	BRD4	2605.01	2728.52	2481.5	0.909464	-0.136911	0.504564	1
1518	BRD7	716.245	683.994	748.496	1.0943	0.130013	0.488364	1
1519	BRD8	0.962416	1.44416	0.480675	0.332841	-1.58709	0.817461	1
1520	BRD9	184.485	175.207	193.763	1.10591	0.145232	0.613285	1
1521	BRDT	0	0	0	NA	NA	NA	NA
1522	BRE	19.6207	21.3994	17.8421	0.833764	-0.262288	0.665735	1
1523	BREA2	0.815694	1.63139	0	0	#NAME?	0.554074	1
1524	BRF1	116.042	124.359	107.725	0.866246	-0.207151	0.537505	1
1525	BRF2	167.701	183.774	151.627	0.825073	-0.277407	0.312906	1
1526	BRI3	1375.47	1266.42	1484.52	1.17221	0.229235	0.224526	0.948208
1527	BRI3BP	332.717	287.504	377.93	1.31452	0.394536	0.0765704	0.671128
1528	BRIP1	122.283	98.087	146.479	1.49335	0.578555	0.0562254	0.591581
1529	BRIX1	719.597	777.726	661.469	0.850516	-0.233589	0.275318	1
1530	BRK1	1557.49	1556.7	1558.29	1.00102	0.00147573	0.970899	1
1531	BRMS1	860.131	798.108	922.153	1.15542	0.208423	0.327321	1
1532	BRMS1L	486.459	547.297	425.62	0.777677	-0.362757	0.0871607	0.707574
1533	BROX	205.631	225.543	185.719	0.823432	-0.280279	0.268783	0.99481
1534	MPC2	748.64	807.647	689.633	0.853879	-0.227896	0.248821	0.976776
1535	MPC1	2068.73	1867.43	2270.04	1.2156	0.281663	0.120432	0.791051
1536	BRPF1	58.2779	66.0347	50.521	0.765067	-0.386342	0.318776	1
1537	BRPF3	750.805	801.484	700.126	0.873538	-0.195058	0.352584	1
1538	BRS3	0	0	0	NA	NA	NA	NA
1539	BRSK1	10.0654	5.5894	14.5414	2.6016	1.3794	0.156356	0.857343
1540	BRSK2	26.0474	21.6803	30.4145	1.40286	0.488375	0.404703	1
1541	BRWD1	542.735	511.171	574.299	1.1235	0.167996	0.409041	1
1542	BRWD3	103.815	113.393	94.2377	0.831071	-0.266957	0.351376	1
1543	BSCL2	145.255	145.143	145.367	1.00155	0.00223362	1	1
1544	BSDC1	1010.6	1088.26	932.931	0.857267	-0.222183	0.27982	1
1545	BSG	7373.7	6963.54	7783.86	1.1178	0.160665	0.362107	1
1546	BSN	7.6478	6.22681	9.06878	1.45641	0.542416	0.675385	1
1547	BSND	0	0	0	NA	NA	NA	NA
1548	BSPH1	0	0	0	NA	NA	NA	NA
1549	BSPRY	4.43134	6.32042	2.54225	0.402228	-1.31391	0.375157	1
1550	BST1	1.77811	3.07554	0.480675	0.156289	-2.67771	0.410812	1
1551	BST2	1174.95	1141.14	1208.76	1.05926	0.0830501	0.625947	1
1552	BSX	0	0	0	NA	NA	NA	NA
1553	BTAF1	386.158	376.833	395.484	1.04949	0.0696932	0.728786	1
1554	BTBD1	1238.73	1346.42	1131.04	0.840034	-0.25148	0.206189	0.925579
1555	BTBD10	227.556	234.097	221.016	0.944121	-0.0829564	0.712851	1
1556	BTBD11	34.5614	41.2968	27.8259	0.673802	-0.569603	0.253881	0.979431
1557	BTBD16	132.19	131.058	133.322	1.01728	0.0247147	0.947486	1
1558	BTBD17	0	0	0	NA	NA	NA	NA
1559	BTBD18	0.22509	0.450181	0	0	#NAME?	1	1
1560	BTBD19	144.561	141.786	147.336	1.03915	0.0553975	0.872386	1
1561	BTBD2	1084.39	1082.18	1086.6	1.00409	0.00588333	0.990457	1
1562	BTBD3	764.211	772.979	755.443	0.977314	-0.0331059	0.906156	1
1563	BTBD6	7.32749	2.17518	12.4798	5.73736	2.52039	0.0235469	0.374917
1564	BTBD7	714.416	678.693	750.138	1.10527	0.144397	0.494032	1
1565	BTBD8	14.8502	15.5471	14.1533	0.910352	-0.135504	0.92123	1
1566	BTBD9	120.843	125.54	116.146	0.925172	-0.112207	0.789153	1
1567	BTC	0	0	0	NA	NA	NA	NA
1568	BTD	416.519	358.513	474.525	1.32359	0.404458	0.0655219	0.630674
1569	BTF3	1635.47	1802.19	1468.75	0.814982	-0.29516	0.108395	0.7628
1570	BTF3L4	268.653	306.336	230.971	0.753978	-0.407405	0.0895942	0.715749
1571	BTF3P11	1.00764	0	2.01529	Inf	Inf	0.411195	1
1572	BTG1	581.195	686.423	475.967	0.693401	-0.528238	0.0128541	0.267064
1573	BTG2	466.481	537.058	395.904	0.737171	-0.439928	0.0338706	0.453744
1574	BTG3	111.467	111.254	111.681	1.00384	0.00552807	1	1
1575	BTG4	0	0	0	NA	NA	NA	NA
1576	BTK	0.271898	0.543796	0	0	#NAME?	1	1
1577	BTLA	0	0	0	NA	NA	NA	NA
1578	BTN1A1	0.22509	0.450181	0	0	#NAME?	1	1
1579	BTN2A1	394.309	452.754	335.865	0.741828	-0.430844	0.0535235	0.577968
1580	BTN2A2	107.963	132.275	83.6521	0.632412	-0.661063	0.0361129	0.472722
1581	BTN3A1	43.2747	48.647	37.9023	0.779129	-0.360065	0.471977	1
1582	BTN3A2	458.061	449.634	466.488	1.03748	0.0530902	0.747028	1
1583	BTN3A3	27.0092	31.5085	22.5099	0.714408	-0.48518	0.369921	1
1584	BTNL2	0	0	0	NA	NA	NA	NA
1585	BTNL3	0	0	0	NA	NA	NA	NA
1586	BTNL8	1.9464	1.35054	2.54225	1.88239	0.912569	0.844412	1
1587	BTNL9	0	0	0	NA	NA	NA	NA
1588	BTRC	351.678	361.388	341.968	0.946264	-0.079685	0.68591	1
1589	BUB1	646.57	546.62	746.52	1.3657	0.449644	0.0263398	0.398912
1590	BUB1B	329.897	262.227	397.567	1.51612	0.600382	0.00912822	0.216553
1591	BUB3	3079.47	2853.58	3305.36	1.15832	0.212031	0.247549	0.976067
1592	BUD13	235.144	219.125	251.163	1.14621	0.19687	0.414024	1
1593	BUD31	495.461	527.051	463.871	0.880126	-0.184219	0.358359	1
1594	BVES	42.5772	35.4844	49.67	1.39977	0.485189	0.297087	1
1595	BYSL	407.554	424.392	390.716	0.920649	-0.119277	0.604893	1
1596	BZRAP1	0.240337	0	0.480675	Inf	Inf	0.999087	1
1597	BZW1	4396.03	4519.12	4272.93	0.945523	-0.0808156	0.680238	1
1598	BZW2	808.718	849.679	767.756	0.903583	-0.146271	0.451915	1
1599	C10orf10	920.255	712.498	1128.01	1.58318	0.662823	0.000650215	0.0371273
1600	DNAJC9-AS1	0	0	0	NA	NA	NA	NA
1601	C10orf105	0	0	0	NA	NA	NA	NA
1602	C10orf107	0	0	0	NA	NA	NA	NA
1603	C10orf108	78.5159	70.0506	86.9813	1.24169	0.312309	0.432188	1
1604	C10orf11	151.154	154.138	148.17	0.96128	-0.056971	0.930532	1
1605	C10orf111	4.80369	6.05747	3.5499	0.586036	-0.77094	0.63297	1
1606	C10orf113	0	0	0	NA	NA	NA	NA
1607	C10orf116	2.48336	3.43211	1.53461	0.447133	-1.16122	0.623631	1
1608	C10orf118	516.703	560.259	473.147	0.844515	-0.243805	0.235011	0.960447
1609	C10orf12	357.983	314.654	401.313	1.27541	0.350959	0.100429	0.741876
1610	C10orf120	0	0	0	NA	NA	NA	NA
1611	TEX36	0	0	0	NA	NA	NA	NA
1612	FUOM	45.5576	46.5297	44.5855	0.958216	-0.0615767	0.936118	1
1613	C10orf128	0	0	0	NA	NA	NA	NA
1614	C10orf129	0	0	0	NA	NA	NA	NA
1615	C10orf131	1.73655	0.450181	3.02293	6.71492	2.74737	0.401776	1
1616	LINC00619	0	0	0	NA	NA	NA	NA
1617	C10orf137	179.242	184.282	174.201	0.945295	-0.0811631	0.774419	1
1618	SKIDA1	4.46132	5.32645	3.59619	0.675157	-0.566705	0.719832	1
1619	C10orf2	410.402	458.388	362.417	0.790632	-0.338922	0.146232	0.840024
1620	C10orf25	0.535382	0.543796	0.526968	0.969054	-0.0453505	1	1
1621	WBP1L	515.821	524.944	506.698	0.965244	-0.0510349	0.765215	1
1622	TBATA	0	0	0	NA	NA	NA	NA
1623	R3HCC1L	152.532	145.856	159.208	1.09154	0.126366	0.687976	1
1624	C10orf32	398.026	420.211	375.84	0.894407	-0.160996	0.487056	1
1625	C10orf35	24.8657	27.1003	22.6311	0.835085	-0.260005	0.631171	1
1626	CACUL1	409.624	412.263	406.984	0.987194	-0.0185938	0.93468	1
1627	C10orf47	320.91	358.7	283.119	0.789291	-0.34137	0.133425	0.817381
1628	C10orf53	0	0	0	NA	NA	NA	NA
1629	C10orf54	12.7213	11.1967	14.2459	1.27233	0.347472	0.733028	1
1630	C10orf55	26.7348	41.8585	11.611	0.277388	-1.85002	0.00147567	0.066401
1631	C10orf62	17.0458	17.535	16.5567	0.944206	-0.0828264	0.983661	1
1632	C10orf67	0.22509	0.450181	0	0	#NAME?	1	1
1633	C10orf68	0	0	0	NA	NA	NA	NA
1634	C10orf71	0	0	0	NA	NA	NA	NA
1635	C10orf76	226.702	257.765	195.639	0.758984	-0.397859	0.101176	0.74329
1636	PLEKHS1	0.240337	0	0.480675	Inf	Inf	0.999087	1
1637	C10orf82	0.450181	0.900361	0	0	#NAME?	0.776604	1
1638	C10orf88	166.359	164.158	168.561	1.02682	0.0381897	0.86041	1
1639	C10orf90	0	0	0	NA	NA	NA	NA
1640	C10orf91	0.80728	1.08759	0.526968	0.484527	-1.04535	1	1
1641	C10orf95	3.19647	2.98193	3.41102	1.1439	0.193956	0.984836	1
1642	CCDC172	0.767305	0	1.53461	Inf	Inf	0.557178	1
1643	C10orf99	3.0424	4.06952	2.01529	0.495214	-1.01388	0.652563	1
1644	C11orf1	61.4775	56.3579	66.597	1.18168	0.240839	0.561167	1
1645	C11orf10	1185.64	1090.05	1281.23	1.17538	0.233131	0.213018	0.935392
1646	C11orf16	0	0	0	NA	NA	NA	NA
1647	VPS51	821.657	781.603	861.712	1.10249	0.14077	0.485573	1
1648	C11orf20	8.29943	6.86422	9.73463	1.41817	0.50403	0.681909	1
1649	C11orf21	0.722079	1.44416	0	0	#NAME?	0.576407	1
1650	C11orf24	1633.25	1560.9	1705.59	1.0927	0.127893	0.496342	1
1651	C11orf30	484.36	486.272	482.447	0.992134	-0.011393	0.932846	1
1652	C11orf31	427.807	346.139	509.475	1.47188	0.557659	0.0113513	0.249195
1653	C11orf34	0	0	0	NA	NA	NA	NA
1654	C11orf35	38.9026	40.2092	37.596	0.93501	-0.0969469	0.921896	1
1655	C11orf40	0	0	0	NA	NA	NA	NA
1656	KIAA1549L	0.263484	0	0.526968	Inf	Inf	0.999088	1
1657	C11orf42	0.271898	0.543796	0	0	#NAME?	1	1
1658	C11orf45	0	0	0	NA	NA	NA	NA
1659	ARL14EP	113.961	127.233	100.689	0.791377	-0.337562	0.253665	0.979431
1660	C11orf48	57.9023	46.8683	68.9363	1.47085	0.556651	0.175461	0.878131
1661	C11orf49	317.149	353.298	281	0.795363	-0.330314	0.157162	0.857343
1662	ANAPC15	318.818	293.624	344.012	1.17161	0.22849	0.335953	1
1663	C11orf52	78.1009	70.9688	85.233	1.20099	0.264226	0.480397	1
1664	C11orf53	0	0	0	NA	NA	NA	NA
1665	C11orf54	555.202	539.046	571.358	1.05994	0.0839856	0.699343	1
1666	C11orf57	264.5	261.42	267.581	1.02357	0.0336053	0.919254	1
1667	C11orf58	3443.97	3378.11	3509.83	1.03899	0.0551851	0.760011	1
1668	MSANTD2	86.7543	84.4302	89.0784	1.05505	0.0773166	0.75035	1
1669	C11orf63	0.271898	0.543796	0	0	#NAME?	1	1
1670	C11orf65	0.263484	0	0.526968	Inf	Inf	0.999088	1
1671	AAMDC	172.025	172.769	171.282	0.991391	-0.0124736	0.925178	1
1672	C11orf70	0	0	0	NA	NA	NA	NA
1673	C11orf73	478.955	454.042	503.868	1.10974	0.150218	0.460906	1
1674	C11orf74	66.198	65.6424	66.7536	1.01693	0.0242186	1	1
1675	C11orf75	246.511	257.426	235.596	0.915199	-0.127842	0.560134	1
1676	C11orf80	177.132	188.918	165.346	0.875228	-0.192268	0.432668	1
1677	C11orf82	101.988	84.0199	119.956	1.42771	0.513699	0.102539	0.74623
1678	C11orf83	221.768	225.561	217.975	0.966367	-0.0493565	0.833932	1
1679	C11orf84	648.26	574.371	722.149	1.25729	0.330313	0.101645	0.744763
1680	C11orf85	0	0	0	NA	NA	NA	NA
1681	C11orf86	3.77236	6.58338	0.96135	0.146027	-2.77569	0.113489	0.779173
1682	C11orf87	0	0	0	NA	NA	NA	NA
1683	C11orf88	0	0	0	NA	NA	NA	NA
1684	C11orf9	565.366	560.535	570.198	1.01724	0.0246568	0.925826	1
1685	C11orf91	1.89434	3.78868	0	0	#NAME?	0.130672	0.810257
1686	C11orf92	44.227	40.1335	48.3206	1.20399	0.267829	0.518141	1
1687	C11orf93	378.989	366.821	391.157	1.06634	0.0926716	0.681987	1
1688	C11orf94	3.90962	3.78868	4.03057	1.06385	0.0892904	1	1
1689	C11orf95	12.8606	9.39597	16.3252	1.73747	0.796987	0.308202	1
1690	C11orf96	0.488574	0.450181	0.526968	1.17057	0.22721	1	1
1691	C12orf10	184.494	190.358	178.631	0.938395	-0.0917331	0.733876	1
1692	CCER1	1.53461	0	3.06922	Inf	Inf	0.217258	0.940542
1693	C12orf23	621.188	653.714	588.662	0.900489	-0.15122	0.451189	1
1694	FAM216A	96.3023	92.2746	100.33	1.0873	0.120746	0.777976	1
1695	METTL25	20.3879	19.5051	21.2708	1.09053	0.125027	0.868267	1
1696	C12orf29	376.652	414.283	339.02	0.818329	-0.289246	0.207455	0.926272
1697	LINC00612	1.54251	0.450181	2.63484	5.85285	2.54914	0.503249	1
1698	FAM222A	166.168	127.305	205.032	1.61056	0.687564	0.0101999	0.233288
1699	KIAA1551	262.798	273.891	251.704	0.918991	-0.121877	0.644086	1
1700	C12orf36	0.713665	0.900361	0.526968	0.585285	-0.77279	1	1
1701	LINC00615	0	0	0	NA	NA	NA	NA
1702	C12orf39	3.80234	5.5894	2.01529	0.360555	-1.47171	0.349374	1
1703	C12orf4	35.4112	39.8348	30.9877	0.777906	-0.362332	0.443882	1
1704	C12orf40	0.263484	0	0.526968	Inf	Inf	0.999088	1
1705	C12orf42	0.263484	0	0.526968	Inf	Inf	0.999088	1
1706	C12orf43	224.059	230.642	217.476	0.942916	-0.0847992	0.72484	1
1707	C12orf44	564.934	590.386	539.481	0.913776	-0.130088	0.534508	1
1708	C12orf45	134.378	144.318	124.438	0.862252	-0.213818	0.446734	1
1709	MAPKAPK5-AS1	57.2892	60.276	54.3024	0.900895	-0.150569	0.723758	1
1710	C12orf49	491.792	518.609	464.975	0.896581	-0.157494	0.416513	1
1711	C12orf5	202.118	227.816	176.419	0.774393	-0.368862	0.134847	0.81997
1712	C12orf50	0	0	0	NA	NA	NA	NA
1713	HECTD4	138.929	137.547	140.312	1.0201	0.0287052	0.959875	1
1714	C12orf52	280.851	288.48	273.221	0.947104	-0.0784056	0.736031	1
1715	C12orf54	0.240337	0	0.480675	Inf	Inf	0.999087	1
1716	C12orf56	0	0	0	NA	NA	NA	NA
1717	C12orf57	1143.44	1128.4	1158.48	1.02665	0.0379455	0.854711	1
1718	TMEM52B	0.271898	0.543796	0	0	#NAME?	1	1
1719	C12orf60	7.16345	10.2963	4.03057	0.391457	-1.35307	0.224847	0.948838
1720	C12orf61	2.82415	2.62536	3.02293	1.15143	0.203429	0.986559	1
1721	COX14	36.7602	48.8563	24.6641	0.50483	-0.986132	0.0365311	0.474931
1722	C12orf65	195.365	181.448	209.283	1.15341	0.205905	0.392417	1
1723	C12orf66	77.2395	68.192	86.2869	1.26535	0.339539	0.338337	1
1724	C12orf68	0.790452	0	1.5809	Inf	Inf	0.551873	1
1725	C12orf69	2.63852	3.16916	2.10787	0.66512	-0.588314	0.877105	1
1726	C12orf70	1.01606	0.543796	1.48832	2.7369	1.45255	0.799615	1
1727	C12orf71	0	0	0	NA	NA	NA	NA
1728	C12orf73	212.737	189.778	235.696	1.24196	0.312614	0.222673	0.946511
1729	C12orf74	0.815694	1.63139	0	0	#NAME?	0.554074	1
1730	C12orf75	285.755	323.051	248.46	0.769106	-0.378745	0.102661	0.74623
1731	C12orf76	0	0	0	NA	NA	NA	NA
1732	C12orf77	0	0	0	NA	NA	NA	NA
1733	RGCC	83.6489	92.7785	74.5193	0.803195	-0.316177	0.355555	1
1734	TEX29	1.47465	1.98795	0.96135	0.483588	-1.04815	0.845548	1
1735	TEX26	0	0	0	NA	NA	NA	NA
1736	TEX30	7.19553	10.9337	3.45731	0.316206	-1.66107	0.149175	0.846265
1737	FAM216B	0	0	0	NA	NA	NA	NA
1738	MEDAG	0	0	0	NA	NA	NA	NA
1739	C13orf35	0	0	0	NA	NA	NA	NA
1740	C14orf1	4392.28	3723.26	5061.3	1.35937	0.44294	0.0124925	0.264531
1741	C14orf101	94.2649	96.5851	91.9447	0.951956	-0.0710338	0.863663	1
1742	NRDE2	189.103	191.877	186.328	0.97108	-0.0423384	0.915375	1
1743	C14orf105	2.38975	3.24488	1.53461	0.472933	-1.08029	0.629189	1
1744	TMEM251	83.6177	64.965	102.27	1.57424	0.654652	0.0484657	0.54856
1745	GPATCH2L	162.999	150.077	175.921	1.17221	0.229226	0.432973	1
1746	C14orf119	1217.76	1228.99	1206.54	0.981736	-0.0265934	0.899323	1
1747	DTD2	300.387	342.44	258.334	0.754391	-0.406615	0.0806775	0.683694
1748	GSKIP	283.157	282.222	284.091	1.00662	0.00952413	0.988423	1
1749	VIPAS39	205.199	206.269	204.128	0.989618	-0.0150568	0.841199	1
1750	PCNXL4	414.592	442.631	386.554	0.87331	-0.195435	0.355215	1
1751	C14orf142	287.206	296.267	278.145	0.938832	-0.0910614	0.697504	1
1752	L3HYPDH	148.981	174.382	123.581	0.708676	-0.496803	0.0617416	0.615724
1753	C14orf159	28.9961	25.5446	32.4475	1.27023	0.345085	0.557367	1
1754	C14orf162	0	0	0	NA	NA	NA	NA
1755	C14orf166	1580.68	1507.13	1654.24	1.09761	0.134362	0.491563	1
1756	C14orf166B	0	0	0	NA	NA	NA	NA
1757	C14orf169	108.176	94.3342	122.017	1.29346	0.371234	0.222032	0.946122
1758	TMEM253	0.535382	0.543796	0.526968	0.969054	-0.0453505	1	1
1759	C14orf177	0	0	0	NA	NA	NA	NA
1760	C14orf178	19.3167	18.3418	20.2917	1.10631	0.14576	0.865721	1
1761	C14orf180	0	0	0	NA	NA	NA	NA
1762	C14orf182	0.480675	0	0.96135	Inf	Inf	0.762071	1
1763	C14orf183	0	0	0	NA	NA	NA	NA
1764	C14orf2	2328.12	2313.43	2342.81	1.0127	0.0182048	0.857161	1
1765	NOP9	446.259	436.493	456.024	1.04474	0.0631496	0.755794	1
1766	C14orf23	0	0	0	NA	NA	NA	NA
1767	C14orf28	91.0089	87.1891	94.8287	1.08762	0.121177	0.699569	1
1768	C14orf37	2.83256	3.16916	2.49596	0.787578	-0.344506	1	1
1769	CCDC175	0	0	0	NA	NA	NA	NA
1770	C14orf39	1.4594	2.43813	0.480675	0.197149	-2.34264	0.5269	1
1771	ELMSAN1	187.585	199.499	175.672	0.880565	-0.183499	0.415597	1
1772	CCDC176	25.7024	24.5865	26.8183	1.09077	0.125352	0.832971	1
1773	SYNE3	74.6163	72.4667	76.766	1.05933	0.08315	0.822499	1
1774	C14orf79	0.22509	0.450181	0	0	#NAME?	1	1
1775	C14orf80	89.3334	76.4605	102.206	1.33672	0.418698	0.187273	0.895225
1776	C14orf93	112.744	99.0631	126.425	1.27621	0.351864	0.255145	0.98003
1777	FAM219B	108.663	99.8478	117.478	1.17657	0.234582	0.425014	1
1778	C15orf23	376.293	296.169	456.416	1.54106	0.623927	0.00462923	0.141555
1779	EMC7	1246.96	1241.99	1251.93	1.008	0.0115013	0.910832	1
1780	C15orf26	1.52094	1.98795	1.05394	0.530161	-0.915497	0.843293	1
1781	C15orf27	0.512235	0.543796	0.480675	0.883925	-0.178004	1	1
1782	KATNBL1	124.102	119.411	128.793	1.07857	0.109123	0.733301	1
1783	C15orf32	0.263484	0	0.526968	Inf	Inf	0.999088	1
1784	FAM227B	19.1142	24.3992	13.8292	0.56679	-0.819114	0.236838	0.962254
1785	HEXA-AS1	0.977663	0.993977	0.96135	0.967176	-0.0481503	1	1
1786	C15orf37	16.7429	17.1606	16.3252	0.951321	-0.0719952	0.984357	1
1787	C15orf39	592.093	610.505	573.68	0.93968	-0.0897587	0.630944	1
1788	C15orf40	147.508	149.306	145.709	0.975912	-0.0351768	0.917108	1
1789	C15orf41	128.943	135.822	122.064	0.898701	-0.154088	0.565088	1
1790	TICRR	159.132	112.056	206.207	1.84021	0.87987	0.00119479	0.0563663
1791	C15orf43	0	0	0	NA	NA	NA	NA
1792	VWA9	44.3811	40.9045	47.8576	1.16998	0.22649	0.627221	1
1793	C15orf48	1.02447	1.08759	0.96135	0.883925	-0.178004	1	1
1794	LINC00593	0	0	0	NA	NA	NA	NA
1795	C15orf52	116.822	121.02	112.625	0.930627	-0.103726	0.797185	1
1796	C15orf53	0	0	0	NA	NA	NA	NA
1797	C15orf54	0	0	0	NA	NA	NA	NA
1798	C15orf55	0	0	0	NA	NA	NA	NA
1799	C15orf57	245.171	258.438	231.904	0.897328	-0.156293	0.536097	1
1800	GDPGP1	67.0963	72.4309	61.7617	0.852698	-0.229892	0.529246	1
1801	C15orf59	0	0	0	NA	NA	NA	NA
1802	C15orf60	0	0	0	NA	NA	NA	NA
1803	C15orf61	121.39	117.722	125.058	1.06232	0.0872195	0.761641	1
1804	C15orf62	33.9076	36.5142	31.301	0.857228	-0.22225	0.734286	1
1805	HYPK	660.563	654.714	666.411	1.01787	0.0255483	0.871927	1
1806	C16orf11	0.240337	0	0.480675	Inf	Inf	0.999087	1
1807	C16orf13	297.873	259.806	335.94	1.29304	0.370766	0.105691	0.753617
1808	C16orf3	18.3327	19.0549	17.6106	0.924204	-0.113717	0.889276	1
1809	TSR3	571.811	531.773	611.849	1.15058	0.202364	0.282411	1
1810	C16orf45	24.1888	31.4507	16.927	0.538208	-0.893765	0.121827	0.79485
1811	C16orf46	4.84313	7.67097	2.01529	0.262716	-1.92842	0.170075	0.872545
1812	ENKD1	47.5309	45.705	49.3567	1.0799	0.110894	0.856348	1
1813	C16orf5	1752.71	1957.64	1547.79	0.790639	-0.33891	0.0600876	0.609302
1814	C16orf52	766.539	796.474	736.605	0.924832	-0.112737	0.615591	1
1815	PAGR1	619.881	542.729	697.033	1.28431	0.360994	0.0723136	0.654697
1816	C16orf54	0	0	0	NA	NA	NA	NA
1817	C16orf55	94.1671	93.7546	94.5795	1.0088	0.0126389	1	1
1818	USB1	861.295	818.973	903.617	1.10335	0.141895	0.487411	1
1819	C16orf58	306.748	293.187	320.309	1.09251	0.127643	0.562332	1
1820	C16orf59	93.7231	66.2798	121.166	1.8281	0.870348	0.00857913	0.20999
1821	CMC2	858.526	835.622	881.431	1.05482	0.0769978	0.69752	1
1822	C16orf62	9.87084	12.7345	7.00721	0.550255	-0.861827	0.359532	1
1823	VPS9D1	130.313	132.279	128.348	0.970284	-0.0435215	0.870297	1
1824	C16orf70	1198.85	1322.99	1074.71	0.81233	-0.299862	0.128477	0.806157
1825	C16orf71	0.271898	0.543796	0	0	#NAME?	1	1
1826	C16orf72	668.139	702.678	633.6	0.901694	-0.149291	0.464654	1
1827	MEIOB	0	0	0	NA	NA	NA	NA
1828	C16orf74	0	0	0	NA	NA	NA	NA
1829	C16orf78	0	0	0	NA	NA	NA	NA
1830	BRICD5	37.6383	31.9766	43.3001	1.35412	0.437354	0.345494	1
1831	C16orf80	254.988	221.229	288.748	1.3052	0.384274	0.108364	0.7628
1832	C16orf82	0.526968	0	1.05394	Inf	Inf	0.750735	1
1833	C16orf86	5.19866	5.70091	4.69642	0.823801	-0.279632	0.921217	1
1834	C16orf87	375.305	432.085	318.525	0.737182	-0.439907	0.0476089	0.543694
1835	C16orf88	362.89	302.98	422.8	1.39547	0.480755	0.0299646	0.424814
1836	C16orf89	12.198	14.3659	10.0301	0.698193	-0.518303	0.561137	1
1837	C16orf90	0	0	0	NA	NA	NA	NA
1838	C16orf91	0	0	0	NA	NA	NA	NA
1839	C16orf92	0.503821	0	1.00764	Inf	Inf	0.756277	1
1840	C16orf93	9.38593	8.21476	10.5571	1.28514	0.361923	0.766964	1
1841	C16orf95	9.64413	9.48958	9.79867	1.03257	0.0462409	0.972724	1
1842	C16orf96	0.450181	0.900361	0	0	#NAME?	0.776604	1
1843	C17orf100	264.179	247.126	281.232	1.13801	0.186515	0.401451	1
1844	OGFOD3	465.734	433.187	498.281	1.15027	0.201971	0.310961	1
1845	C17orf102	0	0	0	NA	NA	NA	NA
1846	C17orf103	18.7377	20.7799	16.6955	0.803447	-0.315725	0.654229	1
1847	C17orf104	0.784133	1.08759	0.480675	0.441963	-1.178	1	1
1848	C17orf105	0.488574	0.450181	0.526968	1.17057	0.22721	1	1
1849	C17orf107	17.9441	17.7043	18.1839	1.02708	0.0385548	1	1
1850	LYRM9	7.28282	4.96988	9.59575	1.93078	0.949184	0.397715	1
1851	SMIM5	4.02165	6.60127	1.44202	0.218447	-2.19465	0.204047	0.923929
1852	SMIM6	13.5711	15.7164	11.4259	0.727003	-0.459967	0.588881	1
1853	HID1	913.607	1226.71	600.509	0.489529	-1.03053	1.05136e-07	3.2848e-05
1854	GID4	112.553	104.67	120.436	1.15063	0.202418	0.542317	1
1855	SPATA32	0.22509	0.450181	0	0	#NAME?	1	1
1856	C17orf47	0.543796	1.08759	0	0	#NAME?	0.752934	1
1857	ADPRM	59.8935	78.1318	41.6551	0.53314	-0.907415	0.0188936	0.331067
1858	C17orf49	499.995	480.798	519.192	1.07985	0.110837	0.634911	1
1859	C17orf50	0	0	0	NA	NA	NA	NA
1860	C17orf51	92.6829	109.618	75.7476	0.691012	-0.533217	0.122574	0.795959
1861	C17orf53	83.4263	71.6999	95.1528	1.3271	0.408276	0.249208	0.976776
1862	ENTHD2	366.511	350.446	382.576	1.09169	0.126557	0.535055	1
1863	EFCAB13	0	0	0	NA	NA	NA	NA
1864	C17orf58	167.674	163.596	171.751	1.04985	0.0701853	0.797621	1
1865	C17orf59	151.362	147.166	155.558	1.05702	0.0800057	0.818599	1
1866	C17orf61	493.034	505.96	480.108	0.948904	-0.0756657	0.725377	1
1867	C17orf62	418.584	344.597	492.57	1.42941	0.515417	0.0187345	0.330341
1868	FAM222B	595.395	622.305	568.485	0.913515	-0.1305	0.563063	1
1869	C17orf64	0	0	0	NA	NA	NA	NA
1870	C17orf66	0	0	0	NA	NA	NA	NA
1871	C17orf67	11.446	13.2962	9.59575	0.721694	-0.470541	0.651414	1
1872	CRHR1-IT1	0.969249	0.450181	1.48832	3.30604	1.72511	0.803551	1
1873	C17orf70	302.491	285.373	319.608	1.11996	0.163453	0.525864	1
1874	C17orf72	0.512235	0.543796	0.480675	0.883925	-0.178004	1	1
1875	C17orf74	1.26429	0.993977	1.53461	1.54391	0.626589	0.991919	1
1876	C17orf75	177.681	165.825	189.536	1.14299	0.192815	0.416982	1
1877	C17orf77	0	0	0	NA	NA	NA	NA
1878	C17orf78	0.271898	0.543796	0	0	#NAME?	1	1
1879	C17orf79	424.039	387.695	460.382	1.18749	0.247911	0.265681	0.990858
1880	C17orf80	310.992	296.739	325.244	1.09606	0.132327	0.594505	1
1881	ELP5	451.187	477.737	424.637	0.888852	-0.169984	0.447001	1
1882	C17orf82	24.9892	26.2757	23.7027	0.902079	-0.148674	0.794538	1
1883	C17orf85	409.563	418.558	400.568	0.95702	-0.0633793	0.830845	1
1884	C17orf89	223.66	184.059	263.262	1.43031	0.516328	0.0406134	0.502629
1885	OXLD1	107.567	96.5272	118.606	1.22873	0.297173	0.314625	1
1886	C17orf96	1021.83	1040.93	1002.73	0.963307	-0.0539329	0.73667	1
1887	C17orf97	12.6619	14.5352	10.7886	0.742238	-0.430047	0.570783	1
1888	C17orf98	0	0	0	NA	NA	NA	NA
1889	C17orf99	2.40499	2.7947	2.01529	0.72111	-0.471709	0.882455	1
1890	LDLRAD4	53.6651	61.6444	45.6857	0.741117	-0.432228	0.320778	1
1891	C18orf21	143.726	149.342	138.111	0.9248	-0.112786	0.716607	1
1892	C18orf25	30.4944	26.3872	34.6016	1.3113	0.391003	0.441064	1
1893	DYNAP	0	0	0	NA	NA	NA	NA
1894	C18orf32	143.599	140.36	146.838	1.04615	0.0650946	0.844307	1
1895	CCDC178	0.271898	0.543796	0	0	#NAME?	1	1
1896	C18orf42	0	0	0	NA	NA	NA	NA
1897	C18orf54	6.23678	5.42006	7.0535	1.30137	0.380029	0.80765	1
1898	C18orf56	323.939	312.75	335.128	1.07155	0.0997031	0.66448	1
1899	C18orf62	0	0	0	NA	NA	NA	NA
1900	C18orf63	0.22509	0.450181	0	0	#NAME?	1	1
1901	C18orf8	162.64	143.551	181.728	1.26595	0.340218	0.257044	0.98197
1902	C19orf10	1593.03	1491.12	1694.94	1.13669	0.184841	0.303065	1
1903	C19orf12	7.1908	8.19687	6.18473	0.754524	-0.406361	0.645978	1
1904	C19orf18	6.42506	7.8582	4.99192	0.63525	-0.654603	0.613884	1
1905	C19orf21	205.311	225.539	185.082	0.820621	-0.285211	0.28285	1
1906	C19orf24	758.356	709.319	807.393	1.13826	0.186835	0.377811	1
1907	C19orf25	262.369	246.564	278.173	1.1282	0.174022	0.453164	1
1908	C19orf26	47.8379	47.43	48.2457	1.0172	0.0246001	0.942834	1
1909	CACTIN	261.554	293.231	229.878	0.783946	-0.351174	0.142764	0.833536
1910	C19orf33	5.39429	7.23868	3.5499	0.490406	-1.02795	0.483517	1
1911	C19orf35	0	0	0	NA	NA	NA	NA
1912	C19orf38	6.2573	11.5533	0.96135	0.0832103	-3.58709	0.0106961	0.239347
1913	C19orf40	49.5445	43.5119	55.577	1.27728	0.353076	0.434	1
1914	SMIM7	483.908	469.958	497.857	1.05936	0.0831997	0.74181	1
1915	C19orf43	4715.18	4506.3	4924.05	1.09271	0.127904	0.458143	1
1916	C19orf44	76.7257	64.8714	88.58	1.36547	0.449397	0.194532	0.906956
1917	C19orf45	0	0	0	NA	NA	NA	NA
1918	SYNE4	44.2612	37.0401	51.4824	1.38991	0.474991	0.285396	1
1919	C19orf48	6.04167	3.97591	8.10743	2.03914	1.02796	0.416405	1
1920	DNAAF3	16.4684	14.2722	18.6645	1.30775	0.387088	0.612278	1
1921	C19orf53	884.448	833.188	935.708	1.12305	0.167417	0.387478	1
1922	C19orf54	211.927	196.624	227.229	1.15565	0.208704	0.440306	1
1923	C19orf55	82.4203	79.8568	84.9838	1.0642	0.0897723	0.806449	1
1924	C19orf57	8.02119	8.02753	8.01485	0.99842	-0.00228137	1	1
1925	C19orf59	0.526968	0	1.05394	Inf	Inf	0.750735	1
1926	C19orf6	1486.25	1409.52	1562.97	1.10886	0.149082	0.412836	1
1927	C19orf60	40.7508	38.6536	42.848	1.10851	0.148625	0.789733	1
1928	EMC10	0.240337	0	0.480675	Inf	Inf	0.999087	1
1929	C19orf66	309.443	302.119	316.766	1.04848	0.0683003	0.770755	1
1930	C19orf69	17.7743	27.0067	8.54182	0.316285	-1.6607	0.0160082	0.300806
1931	C19orf70	35.539	29.0525	42.0255	1.44654	0.532603	0.332579	1
1932	C19orf71	1.4594	2.43813	0.480675	0.197149	-2.34264	0.5269	1
1933	C19orf73	22.7935	13.9157	31.6713	2.27595	1.18647	0.0461956	0.535518
1934	SIGLECL1	0	0	0	NA	NA	NA	NA
1935	ADM5	32.8252	34.3032	31.3473	0.913829	-0.130004	0.801927	1
1936	C19orf77	489.631	573.911	405.35	0.706294	-0.501659	0.0160261	0.300806
1937	PET100	163.91	143.716	184.103	1.28102	0.35729	0.194547	0.906956
1938	C19orf80	176.793	190.023	163.562	0.860749	-0.216335	0.386436	1
1939	C19orf81	0	0	0	NA	NA	NA	NA
1940	C1D	296.303	308.778	283.827	0.919194	-0.121558	0.611584	1
1941	C1GALT1	1840.43	1525.76	2155.09	1.41247	0.498222	0.00736517	0.192366
1942	C1GALT1C1	621.386	599.344	643.428	1.07355	0.102393	0.640104	1
1943	C1orf100	0	0	0	NA	NA	NA	NA
1944	C1orf101	0.768886	1.53777	0	0	#NAME?	0.564841	1
1945	C1orf105	0	0	0	NA	NA	NA	NA
1946	C1orf106	369.041	401.437	336.645	0.8386	-0.253945	0.264404	0.990053
1947	C1orf109	296.105	284.825	307.384	1.0792	0.109966	0.627626	1
1948	C1orf110	0	0	0	NA	NA	NA	NA
1949	C1orf111	0	0	0	NA	NA	NA	NA
1950	C1orf112	83.3006	78.1139	88.4874	1.1328	0.179893	0.633387	1
1951	C1orf114	0.22509	0.450181	0	0	#NAME?	1	1
1952	C1orf115	468.836	489.909	447.764	0.913973	-0.129777	0.517004	1
1953	C1orf116	54.3261	59.5092	49.143	0.825806	-0.276126	0.485209	1
1954	C1orf122	235.93	237.114	234.745	0.990009	-0.0144871	0.926241	1
1955	C1orf123	582.207	535.214	629.2	1.1756	0.233403	0.241244	0.968896
1956	SPRTN	268.512	286.399	250.625	0.875092	-0.192494	0.43174	1
1957	C1orf126	42.9606	47.2249	38.6963	0.819404	-0.287354	0.533568	1
1958	C1orf127	0.496988	0.993977	0	0	#NAME?	0.764234	1
1959	C1orf129	0	0	0	NA	NA	NA	NA
1960	NCMAP	26.7657	27.176	26.3553	0.9698	-0.0442401	0.964938	1
1961	C1orf131	202.92	188.414	217.426	1.15398	0.206623	0.45641	1
1962	SERTAD4-AS1	0	0	0	NA	NA	NA	NA
1963	AUNIP	103.135	84.0778	122.192	1.45332	0.53935	0.0886441	0.71396
1964	C1orf140	0	0	0	NA	NA	NA	NA
1965	C1orf141	0	0	0	NA	NA	NA	NA
1966	SZRD1	2771.9	2894.89	2648.92	0.915035	-0.128101	0.4905	1
1967	C1orf146	0	0	0	NA	NA	NA	NA
1968	GCSAML	0	0	0	NA	NA	NA	NA
1969	C1orf158	0	0	0	NA	NA	NA	NA
1970	C1orf159	152.996	144.033	161.96	1.12446	0.169235	0.487353	1
1971	C1orf162	0.240337	0	0.480675	Inf	Inf	0.999087	1
1972	C1orf168	6.76426	5.51368	8.01485	1.45363	0.53966	0.655176	1
1973	C1orf170	0.488574	0.450181	0.526968	1.17057	0.22721	1	1
1974	C1orf172	29.3238	28.0943	30.5533	1.08753	0.121052	0.877353	1
1975	C1orf173	0	0	0	NA	NA	NA	NA
1976	C1orf174	362.655	346.697	378.614	1.09206	0.127052	0.574133	1
1977	C1orf177	0.512235	0.543796	0.480675	0.883925	-0.178004	1	1
1978	TSACC	7.83925	3.88229	11.7962	3.03847	1.60334	0.146777	0.840417
1979	C1orf185	0	0	0	NA	NA	NA	NA
1980	C1orf186	6.84155	5.32645	8.35664	1.5689	0.64975	0.58971	1
1981	DRAXIN	0.496988	0.993977	0	0	#NAME?	0.764234	1
1982	C1orf189	2.88831	5.77663	0	0	#NAME?	0.0382458	0.484559
1983	LURAP1	2.85045	5.70091	0	0	#NAME?	0.0463435	0.535895
1984	C1orf192	1.48148	0.993977	1.96899	1.98092	0.986174	0.827101	1
1985	C1orf194	0	0	0	NA	NA	NA	NA
1986	C1orf198	377.274	405.399	349.15	0.861249	-0.215498	0.339982	1
1987	C1orf200	0	0	0	NA	NA	NA	NA
1988	STPG1	90.0319	105.156	74.9074	0.712342	-0.489357	0.140707	0.830938
1989	C1orf21	0.503821	0	1.00764	Inf	Inf	0.756277	1
1990	C1orf210	21.981	32.9706	10.9915	0.333373	-1.58479	0.0109341	0.242706
1991	C1orf220	13.5222	13.9914	13.0531	0.932935	-0.100151	0.917315	1
1992	C1orf226	411.678	458.393	364.963	0.796179	-0.328835	0.136281	0.824204
1993	C1orf227	0.22509	0.450181	0	0	#NAME?	1	1
1994	C1orf228	0.915609	1.35054	0.480675	0.355913	-1.49041	0.821919	1
1995	C1orf229	56.1142	48.3125	63.9159	1.32297	0.403778	0.331248	1
1996	C1orf27	29.4121	32.0523	26.772	0.835259	-0.259705	0.605191	1
1997	COA6	46.2802	47.4479	45.1125	0.950778	-0.0728192	0.936773	1
1998	C1orf35	109.023	87.3942	130.652	1.49497	0.580117	0.0535317	0.577968
1999	THEMIS2	5.07661	6.7885	3.36472	0.495651	-1.0126	0.555279	1
[truncated: 18,811 more rows]

## Sheet: 2x2 downreg. genes
	id	baseMean	baseMeanA	baseMeanB	foldChange	log2FoldChange	pval	padj
1125	ATP10A	11.5459	22.1304	0.96135	0.0434402	-4.52483	5.05731e-05	0.00504482
17737	TRIM31	38.6483	73.8392	3.45731	0.0468221	-4.41667	2.09517e-13	2.16837e-10
3455	CLEC10A	10.9548	20.8556	1.05394	0.0505349	-4.30658	8.82716e-05	0.00790103
12551	PARP6	9.16351	17.3657	0.96135	0.0553592	-4.17503	0.000739861	0.0411119
11984	OR10H2	14.8997	27.7377	2.06158	0.074324	-3.75003	2.48199e-05	0.00274666
16121	SORCS2	26.5781	49.0793	4.07686	0.0830668	-3.58958	5.95171e-08	1.97109e-05
5823	FBXO34	9.4091	17.3299	1.48832	0.0858816	-3.54151	0.0013399	0.0616319
8791	LAIR1	9.14615	16.804	1.48832	0.0885693	-3.49705	0.00198109	0.0808429
4058	CXCL3	14.8828	27.2697	2.49596	0.0915289	-3.44963	6.35871e-05	0.00608635
11299	NCF2	20.3802	37.303	3.45731	0.0926817	-3.43157	3.58017e-06	0.000554056
14006	RAB25	13.8042	25.1124	2.49596	0.0993917	-3.33073	0.000185274	0.0142035
4995	EID1	16.6083	30.1938	3.02293	0.100118	-3.32023	4.77882e-05	0.00485475
17500	TNF	52.2105	94.2984	10.1227	0.107348	-3.21964	6.21115e-12	5.71391e-09
17529	TNFRSF9	12.3221	22.1483	2.49596	0.112693	-3.14953	0.000805874	0.0433262
5479	FAM151A	22.1488	39.6476	4.65012	0.117287	-3.09189	5.1985e-06	0.000717349
11161	MYOF	18.3754	32.2395	4.51125	0.139929	-2.83723	0.000108782	0.00938189
20027	KLRC3	41.028	71.8871	10.169	0.141458	-2.82155	1.66321e-08	6.12023e-06
12848	PGLYRP2	56.8769	99.3977	14.3562	0.144432	-2.79154	2.65911e-10	1.63082e-07
4057	CXCL2	58.4189	101.631	15.2072	0.149632	-2.74051	1.77546e-10	1.13076e-07
17553	TNNT2	14.8528	25.7677	3.93798	0.152827	-2.71003	0.00108545	0.0527095
14220	RBM23	150.57	260.631	40.5086	0.155425	-2.68571	1.2427e-18	3.42964e-15
1139	ATP1A3	14.0419	24.0069	4.07686	0.169821	-2.55792	0.00151347	0.0676864
7149	HCAR3	45.1596	77.1736	13.1456	0.170339	-2.55352	7.60922e-08	2.4231e-05
2621	CASS4	28.3494	48.4061	8.29261	0.171313	-2.54529	8.93436e-06	0.00111694
19766	NOP14-AS1	34.575	58.7782	10.3719	0.176459	-2.5026	2.35377e-06	0.000397715
12690	PDE2A	25.8491	43.249	8.44923	0.195362	-2.35577	8.26369e-05	0.00747751
7106	HAMP	33.2056	55.2345	11.1767	0.202349	-2.30508	9.75686e-06	0.00119677
12696	PDE4D	57.0252	94.7485	19.3018	0.203716	-2.29537	5.86424e-08	1.97109e-05
18032	TUSC3	27.7824	46.0616	9.50317	0.206314	-2.27708	7.85164e-05	0.00720128
10611	MICAL2	19.3457	31.6379	7.0535	0.222944	-2.16524	0.00171115	0.0730208
6336	GADD45B	723.936	1180.02	267.855	0.226992	-2.13928	2.41316e-24	1.99798e-20
6398	GAS7	48.7274	79.0858	18.369	0.232267	-2.10614	2.23684e-06	0.000384689
3618	COBL	78.7859	127.528	30.0441	0.235589	-2.08566	1.74299e-08	6.27438e-06
15236	SERPINB8	19.6471	31.7136	7.58047	0.239029	-2.06474	0.00215928	0.0855395
3037	CDCP1	25.9175	41.8048	10.0301	0.239928	-2.05933	0.000411201	0.025792
7531	HRG	27.5631	44.4302	10.696	0.240737	-2.05447	0.000262571	0.0186606
14255	RBP2	43.4367	69.9927	16.8807	0.241178	-2.05183	7.45725e-06	0.000964724
976	ARNT2	20.3528	32.7833	7.92226	0.241655	-2.04898	0.00198214	0.0808429
16262	SPINT2	24.5838	39.5718	9.59575	0.242489	-2.04401	0.000692129	0.0391159
19529	ZSCAN4	199.697	320.318	79.0768	0.24687	-2.01818	2.68279e-14	3.70202e-11
20438	NEURL3	44.7804	71.8114	17.7495	0.247168	-2.01644	9.25846e-06	0.00114411
4566	DLX2	46.3403	74.0623	18.6182	0.251386	-1.99202	8.97113e-06	0.00111694
4131	CYP1A1	561.637	894.817	228.457	0.255312	-1.96967	4.13938e-20	2.2848e-16
20470	PALM2	31.9345	50.8621	13.0068	0.255726	-1.96733	0.000223531	0.0163059
15139	SECTM1	72.0715	114.423	29.7201	0.259739	-1.94487	2.35344e-07	6.30944e-05
6137	FOSB	147.457	233.246	61.6691	0.264395	-1.91923	7.28813e-11	4.82736e-08
9838	LOC654433	39.9746	62.8656	17.0836	0.271749	-1.87966	7.87074e-05	0.00720128
7502	HP	173.162	272.019	74.3055	0.273163	-1.87217	1.4608e-11	1.15188e-08
1630	C10orf55	26.7348	41.8585	11.611	0.277388	-1.85002	0.00147567	0.066401
8263	KCNK5	24.9214	38.805	11.0378	0.284442	-1.81379	0.00168864	0.072818
16184	SPARC	1089.33	1692.91	485.741	0.286926	-1.80125	1.26546e-19	5.2387e-16
13589	PRKCE	25.0498	38.8766	11.2229	0.288681	-1.79245	0.00258118	0.0978071
11792	NUAK2	76.425	118.341	34.5091	0.291607	-1.7779	1.0908e-06	0.000215031
19873	EGOT	35.3134	54.5971	16.0297	0.2936	-1.76808	0.000312576	0.0215665
10966	MT1X	1124.58	1727.49	521.667	0.301979	-1.72748	6.35863e-19	2.10585e-15
15721	SLC37A2	95.4725	146.36	44.5855	0.30463	-1.71487	3.14501e-07	8.01204e-05
10138	LYVE1	104.095	159.361	48.8298	0.30641	-1.70647	7.10783e-08	2.30782e-05
14573	RNF186	28.4855	43.5298	13.4412	0.30878	-1.69535	0.00210857	0.0841234
17883	TSPAN7	273.576	417.287	129.865	0.311212	-1.68403	6.60158e-12	5.75345e-09
8869	LCN2	40.2302	61.1764	19.2841	0.315221	-1.66556	0.000406323	0.0256806
20426	MYH16	41.9452	63.7838	20.1066	0.31523	-1.66552	0.000325281	0.0220296
6281	FYN	31.3807	47.693	15.0683	0.315945	-1.66226	0.00155603	0.0683455
16752	TAGLN3	90.9687	138.238	43.699	0.316113	-1.66149	8.37075e-07	0.000171125
15462	SIX4	170.918	259.071	82.7656	0.31947	-1.64625	2.68122e-09	1.3454e-06
8633	KRT17	31.4264	47.5994	15.2535	0.320456	-1.6418	0.00154841	0.0683455
15419	SIGIRR	32.3278	48.9499	15.7056	0.320851	-1.64002	0.00178302	0.074672
14781	RRAD	106.936	161.568	52.3048	0.323733	-1.62713	4.173e-07	9.59733e-05
2459	CAB39L	107.926	162.789	53.0633	0.325963	-1.61722	3.33802e-07	8.37489e-05
4200	DAB2	75.5379	113.839	37.2365	0.327097	-1.61221	8.94992e-06	0.00111694
4828	DUSP4	34.6876	51.9497	17.4254	0.335429	-1.57592	0.00186161	0.0770868
16760	TANK	48.0153	71.8472	24.1834	0.336595	-1.57091	0.000337208	0.0222463
13063	PLA2G4C	70.5843	105.513	35.6556	0.337926	-1.56522	2.47119e-05	0.00274666
14327	REPS2	66.9644	100.057	33.8718	0.338524	-1.56267	2.82215e-05	0.00307447
17503	TNFAIP3	1348.42	2013.25	683.584	0.339542	-1.55834	1.09359e-15	2.18654e-12
13152	PLIN4	57.9871	86.3644	29.6097	0.342846	-1.54437	0.00012043	0.0101827
1377	BCL3	107.812	159.972	55.6518	0.347884	-1.52332	1.84281e-06	0.000328118
5069	ELF5	58.6287	86.7967	30.4607	0.350943	-1.51069	0.000120528	0.0101827
826	AQP3	105.629	155.497	55.7621	0.358606	-1.47953	2.67162e-06	0.000429508
4727	DPP4	1022.64	1499.68	545.605	0.363815	-1.45872	1.50779e-13	1.6645e-10
412	AGXT2L1	157.97	231.623	84.3179	0.364031	-1.45787	1.41998e-07	4.27517e-05
3997	CTRL	49.2202	72.0564	26.3839	0.366156	-1.44947	0.000530263	0.0314717
474	AKR1B1	3312.43	4848.44	1776.43	0.366392	-1.44854	1.18841e-15	2.18654e-12
15893	SMAD7	249.044	362.704	135.384	0.373262	-1.42174	1.58898e-08	5.98e-06
10259	MAP3K14	64.2297	93.4696	34.9897	0.374344	-1.41757	0.000302419	0.021041
20420	MT1JP	228.439	332.116	124.763	0.375659	-1.4125	1.12284e-08	4.53491e-06
3105	CDKN2B	276.231	401.575	150.886	0.375737	-1.41221	4.58283e-09	1.99703e-06
475	AKR1B10	7613.06	11067.3	4158.81	0.375774	-1.41206	4.00713e-15	6.03219e-12
3866	CRYAB	83.4649	121.216	45.7143	0.377132	-1.40686	2.48807e-05	0.00274666
10120	LYPD3	49.5446	71.4947	27.5944	0.385965	-1.37346	0.000969869	0.0489636
15778	SLC4A3	106.049	152.925	59.1732	0.386942	-1.36981	1.5087e-05	0.00178447
2994	CDA	173.548	250.205	96.8903	0.387243	-1.36869	4.27742e-07	9.62584e-05
18075	TYW5	51.7455	74.4546	29.0365	0.389989	-1.3585	0.00127354	0.0597335
11458	NFKBIA	5916.85	8509.24	3324.46	0.390688	-1.35591	7.40664e-14	9.43435e-11
12524	PAQR5	59.9461	86.1593	33.7329	0.391517	-1.35285	0.000498629	0.029916
12712	PDGFB	45.777	65.7897	25.7643	0.391617	-1.35249	0.00222423	0.0876929
10959	MT1E	3731.37	5362.61	2100.13	0.391626	-1.35245	1.02801e-13	1.21592e-10
8820	LAPTM5	45.1842	64.8177	25.5506	0.394192	-1.34303	0.00237094	0.0913034
2745	CCDC28B	79.8019	114.196	45.408	0.397633	-1.33049	0.000171384	0.0132615
12637	PCK1	162.982	233.041	92.9238	0.398745	-1.32646	2.14101e-06	0.00037319
455	AKAP12	517.066	738.28	295.852	0.400732	-1.31929	7.45869e-10	4.11695e-07
15293	SFRP5	84.2491	120.195	48.3028	0.401869	-1.3152	0.000129486	0.0107746
14524	RND1	57.1225	81.1316	33.1133	0.408143	-1.29285	0.001282	0.0597989
2010	C1orf63	62.8701	89.1234	36.6169	0.410857	-1.28329	0.000715	0.0401346
4829	DUSP5	245.232	346.741	143.723	0.414496	-1.27057	1.82846e-07	5.32954e-05
3045	CDH16	488.349	690.233	286.466	0.415028	-1.26872	2.64973e-09	1.3454e-06
398	AGPAT9	241.554	341.197	141.91	0.415919	-1.26563	4.35979e-07	9.62584e-05
15325	SGMS2	70.253	98.573	41.9329	0.425399	-1.23311	0.000772551	0.0425106
11692	NR1D1	197.861	277.551	118.172	0.425767	-1.23186	1.70565e-06	0.000310372
6901	GRAMD3	99.4815	139.402	59.5612	0.427263	-1.2268	0.000158336	0.0123674
186	ACSM2B	63.089	88.1831	37.9949	0.430864	-1.2147	0.00144645	0.0654422
14892	S100A3	70.7126	98.5772	42.848	0.434664	-1.20203	0.000720912	0.0403297
6907	GRB10	291.24	405.164	177.317	0.437642	-1.19218	7.41675e-07	0.000155461
15446	SIRPA	205.608	285.538	125.678	0.440143	-1.18396	4.0432e-06	0.00059249
15775	SLC4A11	1764.32	2442.87	1085.77	0.444463	-1.16986	4.84524e-10	2.76663e-07
13430	PPP1R15A	872.764	1207.97	537.554	0.445005	-1.16811	3.35083e-09	1.63195e-06
15339	SH2B3	126.613	175.185	78.0406	0.445476	-1.16658	9.82275e-05	0.00866728
7938	INHBE	269.756	372.447	167.066	0.448563	-1.15662	1.33595e-06	0.000251386
17069	THAP2	87.374	120.271	54.4767	0.452949	-1.14258	0.000851937	0.0446965
7367	HKDC1	386.924	532.391	241.457	0.453533	-1.14072	2.02655e-07	5.68773e-05
2906	CD109	161.202	221.732	100.672	0.454023	-1.13916	3.82588e-05	0.00406028
7817	IL11	216.11	296.566	135.654	0.457418	-1.12842	6.44672e-06	0.00085401
6763	GPD1	241.981	331.466	152.496	0.460064	-1.12009	5.6786e-06	0.000758604
11001	MTMR11	127.979	175.301	80.6577	0.460111	-1.11995	0.000121296	0.0101956
15825	SLC7A5P1	86.3142	117.967	54.6619	0.463368	-1.10977	0.00100814	0.0502825
1272	B3GNT3	454.343	620.722	287.965	0.46392	-1.10805	2.51363e-07	6.60685e-05
5655	FAM59A	97.9491	133.812	62.0858	0.463976	-1.10788	0.000612388	0.0354564
12372	OSGIN1	236.032	322.36	149.704	0.464402	-1.10655	5.37553e-06	0.000729618
4799	DTX4	72.5801	98.9475	46.2127	0.467043	-1.09837	0.00262706	0.0993185
15790	SLC5A3	1841.01	2507.6	1174.42	0.468345	-1.09436	3.69448e-09	1.74791e-06
3818	CREB3L3	142.938	194.338	91.5389	0.47103	-1.08611	9.84026e-05	0.00866728
1441	BIRC3	263.701	358.459	168.942	0.471301	-1.08528	5.2559e-06	0.000719277
8534	KLHDC7A	75.8775	103.075	48.6801	0.472279	-1.08229	0.00263787	0.0995001
14313	REL	323.115	438.758	207.471	0.47286	-1.08052	3.74515e-06	0.000566108
7668	ICAM1	1348.52	1829.15	867.894	0.474479	-1.07559	1.1018e-08	4.53491e-06
18208	UGT2A3	721.93	976.788	467.072	0.478172	-1.0644	1.83455e-07	5.32954e-05
6236	FSTL3	391.541	529.053	254.029	0.480159	-1.05842	1.25753e-06	0.000239349
6853	GPR56	443.319	598.516	288.122	0.481394	-1.05471	1.0319e-06	0.00020587
15818	SLC7A11	1820.51	2455.93	1185.08	0.482539	-1.05128	1.3703e-08	5.40258e-06
14014	RAB31	105.365	141.804	68.9255	0.486062	-1.04079	0.000940015	0.0480423
10967	MT2A	33904.8	45546.4	22263.2	0.488803	-1.03268	3.89607e-09	1.79209e-06
1853	HID1	913.607	1226.71	600.509	0.489529	-1.03053	1.05136e-07	3.2848e-05
1054	ASNS	372.838	500.54	245.135	0.489741	-1.02991	3.89407e-06	0.000575732
19919	FLJ43663	91.2347	122.353	60.1168	0.49134	-1.02521	0.00203702	0.0824719
3977	CTH	98.3271	131.713	64.9413	0.493052	-1.02019	0.00167327	0.0727237
4163	CYP3A7	180.131	241.286	118.977	0.493094	-1.02006	6.44029e-05	0.00612901
7418	HMOX1	572.906	764.51	381.302	0.498753	-1.0036	1.75784e-06	0.000316391
7808	IKBKE	181.126	241.26	120.992	0.501501	-0.995675	0.00013702	0.0111769
3231	CES1	3834.95	5107.43	2562.47	0.501714	-0.995061	5.18266e-08	1.78791e-05
6446	GCLC	964.948	1281.99	647.903	0.505388	-0.984536	4.89299e-07	0.000106609
19462	ZNF827	229.631	304.896	154.365	0.506288	-0.981969	5.23373e-05	0.00518954
14486	RIPK4	357.296	474.135	240.456	0.507147	-0.979524	1.32397e-05	0.00157724
38	ABCA5	108.592	143.886	73.2979	0.509418	-0.973079	0.00182087	0.0759489
5167	EPB41L1	1138.72	1508.81	768.628	0.509426	-0.973057	3.97811e-07	9.46945e-05
6875	GPRC5A	122.229	161.813	82.6444	0.51074	-0.969338	0.00130409	0.0606587
11165	MYOM3	511.911	676.028	347.793	0.514466	-0.958853	5.68071e-06	0.000758604
8161	JUNB	1027.13	1355.98	698.275	0.514958	-0.957473	1.11522e-06	0.000217259
5581	FAM206A	137.887	181.269	94.5047	0.521352	-0.939671	0.00080475	0.0433262
3889	CSF1	532.585	698.314	366.857	0.525346	-0.928659	7.69811e-06	0.000988163
4976	EGFR	952.597	1248.51	656.681	0.52597	-0.926949	2.56658e-06	0.000425
3436	CLDN15	119.577	156.509	82.6444	0.52805	-0.921253	0.00198866	0.0809095
15237	SERPINB9	181.522	237.413	125.631	0.529167	-0.918204	0.000528493	0.0314717
5163	EP300	354.887	464.026	245.748	0.529599	-0.917029	3.55896e-05	0.00385182
14315	RELB	315.505	412.526	218.484	0.529624	-0.916958	5.84128e-05	0.00562359
19826	CYP21A1P	210.595	275.314	145.877	0.529857	-0.916326	0.000348511	0.0227205
6136	FOS	144.781	189.029	100.533	0.531838	-0.910941	0.00110981	0.0534223
5249	ERN1	148.823	194.182	103.463	0.532815	-0.908293	0.00136387	0.0624874
15249	SERTAD1	151.416	197.28	105.553	0.535044	-0.90227	0.00105747	0.0518068
10960	MT1F	792.562	1031.67	553.46	0.536472	-0.898425	4.11603e-06	0.000597871
13082	PLAU	516.975	671.58	362.37	0.539579	-0.890095	2.81902e-05	0.00307447
5175	EPC1	290.075	376.628	203.522	0.54038	-0.887953	0.000198523	0.0150107
3063	CDHR2	222.564	288.186	156.943	0.54459	-0.876758	0.00035807	0.0231613
13156	PLK2	337.726	436.681	238.772	0.546789	-0.870945	0.000145914	0.011729
4810	DUSP1	1538.83	1989.6	1088.06	0.546876	-0.870716	4.61848e-06	0.000652408
7809	IKBKG	440.772	567.298	314.246	0.553934	-0.852213	0.000102868	0.00891824
16384	SRXN1	1590.74	2045.25	1136.24	0.555554	-0.848002	7.21119e-06	0.000940237
11461	NFKBIE	185.179	237.065	133.294	0.562266	-0.830675	0.00122707	0.0577246
5067	ELF3	324.053	414.251	233.855	0.564524	-0.824893	0.000323516	0.0220296
2565	CAPN2	250.392	319.623	181.162	0.566799	-0.81909	0.000560361	0.0329043
3385	CIDEB	1422.72	1815.59	1029.86	0.567229	-0.817996	1.53298e-05	0.00180033
10811	MPZ	184.09	234.784	133.397	0.56817	-0.815606	0.00228712	0.088786
14145	RARA	273.241	347.219	199.264	0.573886	-0.801163	0.000783003	0.0425106
17724	TRIM15	620.583	788.022	453.144	0.575039	-0.798268	0.000111011	0.0095245
1176	ATP6V0A1	620.651	786.182	455.12	0.578899	-0.788617	0.00015616	0.0122552
13843	PTGR1	319.43	404.467	234.393	0.57951	-0.787096	0.000460797	0.0281562
19168	ZNF408	305.741	386.639	224.843	0.581533	-0.782068	0.000825424	0.0438083
10399	MCHR1	238.915	301.771	176.06	0.583421	-0.77739	0.00099047	0.0498517
17055	TGM2	579.246	731.575	426.916	0.583558	-0.777052	0.000184711	0.0142035
7900	IL8	514.772	650.123	379.422	0.583616	-0.776908	0.000209719	0.015643
15312	SGCB	221.311	279.106	163.516	0.585855	-0.771385	0.0017779	0.074672
43	ABCB1	311.417	392.661	230.173	0.586188	-0.770564	0.00115418	0.055054
701	ANO10	232.814	292.759	172.869	0.590483	-0.760032	0.00213818	0.0849066
15255	SESN2	669.949	841.902	497.996	0.591513	-0.757518	0.000229943	0.0166434
6612	GLS	3830.64	4811.84	2849.44	0.592173	-0.755909	2.19646e-05	0.00252578
1100	ATG16L1	413.512	518.806	308.218	0.59409	-0.751247	0.000604376	0.0351153
15799	SLC6A12	574.197	717.881	430.513	0.599699	-0.737689	0.000276507	0.0194837
6138	FOSL1	402.395	502.849	301.94	0.600459	-0.735862	0.000778766	0.0425106
8014	IRAK2	275.772	344.41	207.133	0.601414	-0.73357	0.0015165	0.0676864
6981	GSTA1	805.659	1004.93	606.391	0.603418	-0.72877	0.000213952	0.0158871
11069	MXD1	402.964	502.064	303.863	0.605227	-0.724451	0.000866111	0.0452427
12982	PIM1	701.093	873.228	528.959	0.605752	-0.723202	0.000325574	0.0220296
18839	ZC3H12A	298.466	371.341	225.591	0.607503	-0.719037	0.00196755	0.0808315
11033	MTTP	817.041	1016.42	617.663	0.607686	-0.718601	0.000330939	0.0221578
7791	IGSF1	366.487	455.588	277.386	0.608853	-0.715833	0.00131573	0.0608581
19655	GLRX	2362.71	2931.55	1793.88	0.611923	-0.708578	6.90119e-05	0.00645631
11457	NFKB2	889.99	1103.2	676.779	0.613469	-0.704938	0.000365762	0.0234754
16279	SPP1	22025.6	27290.1	16761.2	0.614186	-0.703252	7.49955e-05	0.00697668
15502	SLC12A7	573.742	710.63	436.854	0.614742	-0.701947	0.000684375	0.0388102
14001	RAB20	300.84	372.371	229.308	0.615806	-0.699453	0.00254	0.0964675
4426	DEPDC7	419.063	517.892	320.234	0.618342	-0.693523	0.00136983	0.0624874
14723	RPPH1	42279.8	52250.2	32309.4	0.61836	-0.693481	8.62169e-05	0.00775905
8513	KLF10	365.399	450.979	279.818	0.620469	-0.68857	0.0017058	0.0730208
14104	RALB	2276.33	2807.9	1744.76	0.621374	-0.686467	0.000230168	0.0166434
18099	UBD	2961.19	3652.49	2269.89	0.621463	-0.686258	0.000194924	0.0148062
7698	IER5	448.395	553.056	343.734	0.621518	-0.686131	0.00136668	0.0624874
10961	MT1G	972.022	1196.55	747.49	0.624702	-0.67876	0.000370611	0.0236948
5775	FBLIM1	968.402	1191.7	745.103	0.625243	-0.67751	0.000595912	0.0347455
18097	UBASH3B	1177.47	1447.2	907.747	0.627246	-0.672897	0.000352255	0.0228745
17040	TGFA	421.803	516.876	326.729	0.632123	-0.661723	0.00189926	0.0784283
4980	EGR1	1764.63	2160.16	1369.1	0.633796	-0.65791	0.000344545	0.0225507
7219	HEPACAM	950.995	1163.76	738.228	0.634346	-0.656658	0.000782511	0.0425106
16325	SQSTM1	19164.4	23430.8	14898	0.635831	-0.653286	0.000145025	0.0117145
13984	RAB10	2136.56	2612.11	1661.01	0.63589	-0.65315	0.000392018	0.024967
5363	F2RL1	429.309	524.635	333.982	0.636598	-0.651545	0.00186211	0.0770868
11336	NDRG1	1742.69	2128.63	1356.75	0.637383	-0.649767	0.000407975	0.0256869
18678	WRNIP1	1329.77	1623.66	1035.88	0.637992	-0.648389	0.000782398	0.0425106
1515	BRD2	2197.2	2682.18	1712.22	0.638368	-0.647539	0.000418016	0.0261059
13419	PPP1R10	1355.62	1653.94	1057.3	0.639261	-0.645524	0.000802495	0.0433262
17025	TFE3	518.656	632.436	404.876	0.640185	-0.643438	0.00252085	0.0961816
7619	HSPH1	1531.68	1866.01	1197.36	0.641668	-0.640101	0.000618762	0.0355767
15938	SMOX	672.469	818.987	525.95	0.642196	-0.638915	0.00185956	0.0770868
8128	JAG1	2036.84	2479.05	1594.62	0.643236	-0.63658	0.000817215	0.0436765
7701	IFFO2	624.795	760.235	489.355	0.643689	-0.635565	0.00176426	0.0745266
16961	TEAD4	1162.22	1413.65	910.795	0.644285	-0.634229	0.00109039	0.0527947
14029	RAB3GAP1	648.429	786.435	510.423	0.649033	-0.623635	0.0020586	0.0828421
7950	INPP5D	860.44	1042.67	678.211	0.650458	-0.620472	0.00171539	0.0730208
14903	S100P	1786.48	2164.28	1408.68	0.650878	-0.619541	0.00102356	0.050746
2300	C6orf48	834.992	1010.77	659.219	0.652198	-0.616619	0.00163028	0.0710416
1066	ASS1	1450.71	1751.87	1149.56	0.656187	-0.60782	0.00151567	0.0676864
89	ABHD4	803.012	967.909	638.116	0.659272	-0.601053	0.00219783	0.0868588
13101	PLCXD1	3049.43	3675.36	2423.51	0.659394	-0.600787	0.00100019	0.0501884
6261	FURIN	1333.37	1606.73	1060.01	0.659732	-0.600049	0.00140289	0.0638198
10906	MRPS6	3402.88	4099.34	2706.41	0.660208	-0.599008	0.000698377	0.0393348
17152	TJAP1	1419.39	1709.87	1128.92	0.660236	-0.598945	0.00168354	0.0727877
6404	GATA4	1040.42	1248.82	832.017	0.666243	-0.58588	0.0021043	0.0841234
322	ADI1	1156.91	1388.17	925.649	0.666811	-0.58465	0.00244036	0.0935413
4316	DDIT4	1623.26	1946.28	1300.23	0.668057	-0.581957	0.00192433	0.0792661
13868	PTPN12	2092.91	2506	1679.83	0.670323	-0.577072	0.00204848	0.0827337
16484	STC2	1614.15	1929.55	1298.75	0.673088	-0.571133	0.00229844	0.0889249
15750	SLC3A2	3257.94	3886.59	2629.29	0.676502	-0.563834	0.00178574	0.074672

## Sheet: 2x2 upreg. genes
	id	baseMean	baseMeanA	baseMeanB	foldChange	log2FoldChange	pval	padj
20268	LOC349196	16.2612	0	32.5223	Inf	Inf	4.35467e-09	1.94889e-06
14342	REXO1L1	7.54207	0.450181	14.634	32.5069	5.02267	0.000818384	0.0436765
20765	USP17L6P	10.4498	1.80072	19.0989	10.6063	3.40684	0.0013145	0.0608581
20580	REXO1L2P	19.0012	4.42609	33.5763	7.58599	2.92334	6.66662e-05	0.0062723
14991	SCARA3	19.9331	5.51368	34.3524	6.2304	2.63933	0.00013524	0.0111233
16008	SNORA53	158.887	52.5514	265.223	5.04693	2.33541	8.09826e-16	1.9157e-12
2294	C6orf223	18.9959	6.32042	31.6713	5.01095	2.32508	0.000878253	0.0457327
15156	SEMA3A	22.6557	8.12115	37.1902	4.57943	2.19517	0.000626735	0.0359104
18210	UGT2B11	46.5073	17.4414	75.5732	4.33298	2.11536	2.65095e-06	0.000429508
15545	SLC19A3	53.2768	21.6803	84.8734	3.91478	1.96893	3.63046e-06	0.000556637
13056	PLA2G2A	2859.84	1176.93	4542.76	3.85983	1.94854	8.65328e-25	1.4329e-20
15245	SERPING1	25.108	10.4836	39.7324	3.78998	1.92219	0.00104884	0.0515361
8038	IRX3	77.3687	36.3448	118.393	3.25748	1.70376	1.36929e-06	0.000254765
6458	GDA	34.2299	17.3478	51.112	2.94631	1.55891	0.00176382	0.0745266
7709	IFI6	1141.53	580.005	1703.05	2.93627	1.55399	3.28131e-15	5.43353e-12
4923	EDN1	40.8202	21.6803	59.9601	2.76566	1.46762	0.00171021	0.0730208
12660	PCSK9	475.424	253.018	697.83	2.75802	1.46363	1.64748e-11	1.24003e-08
18209	UGT2B10	461.422	247.424	675.419	2.7298	1.4488	1.82303e-11	1.3125e-08
5318	EXO1	45.7858	24.5865	66.9851	2.72447	1.44598	0.000852955	0.0446965
15171	SEMA6A	165.749	90.2825	241.215	2.67178	1.4178	1.92067e-07	5.48351e-05
7310	HIST1H2AL	104.789	57.1647	152.414	2.66623	1.4148	1.18773e-05	0.00142518
5090	ELOVL6	292.813	161.911	423.715	2.61697	1.3879	6.78106e-09	2.87917e-06
20260	LINC00667	64.4145	35.8589	92.9701	2.59267	1.37444	0.000290802	0.0203181
7296	HIST1H1B	131.81	73.407	190.213	2.59121	1.37363	4.15595e-06	0.00059842
1044	ASF1B	283.961	159.919	408.003	2.55131	1.35124	1.44373e-08	5.55969e-06
2	A1BG	218.728	123.199	314.256	2.55079	1.35095	1.41394e-07	4.27517e-05
16519	STMN3	123.911	70.2915	177.53	2.52563	1.33664	8.0468e-06	0.00102498
15653	SLC29A2	64.9588	37.0401	92.8775	2.50749	1.32624	0.000403945	0.0256281
5950	FGL1	1678.36	964.477	2392.25	2.48036	1.31055	7.5285e-12	6.23322e-09
17973	TTPA	207.25	119.447	295.054	2.47018	1.30461	3.58969e-07	8.7628e-05
12771	PEG10	7329.14	4297.54	10360.7	2.41086	1.26955	1.10053e-12	1.07198e-09
6622	GLTPD2	79.3983	46.7169	112.08	2.39913	1.26251	0.000287916	0.0202017
10346	MATN3	1458.15	860.824	2055.48	2.38781	1.25569	2.9399e-11	2.02841e-08
5517	FAM171A2	106.993	64.4212	149.565	2.32168	1.21517	9.90389e-05	0.00867717
3521	CLSPN	154.72	94.7664	214.674	2.2653	1.1797	2.2679e-05	0.00258994
11946	ONECUT1	131.697	81.1495	182.244	2.24579	1.16722	5.45844e-05	0.00531684
16225	SPDYE7P	60.8491	37.5261	84.1721	2.24303	1.16545	0.00224531	0.0879406
609	ANG	74.7403	46.2488	103.232	2.23209	1.1584	0.00112222	0.0538634
1207	ATP9A	186.234	115.751	256.717	2.21783	1.14915	1.10618e-05	0.00133702
804	APOF	69.6052	43.6056	95.6049	2.19249	1.13257	0.00228949	0.088786
3718	CORO1A	76.97	48.6112	105.329	2.16676	1.11554	0.00117373	0.05569
2654	CBX2	232.609	147.073	318.144	2.16318	1.11315	6.51185e-06	0.000855791
3244	CFD	86.3314	54.9716	117.691	2.14095	1.09825	0.00162771	0.0710416
6465	GDF11	87.3054	55.6627	118.948	2.13695	1.09555	0.00101271	0.0503586
4537	DKK1	4949.79	3159.51	6740.07	2.13327	1.09306	1.76469e-09	9.42628e-07
20050	LINC00261	335.548	215.92	455.177	2.10808	1.07593	2.49618e-06	0.000417517
10366	MBL2	138.569	89.6809	187.457	2.09027	1.06369	0.000127451	0.0106589
6234	FST	764.658	496.216	1033.1	2.08196	1.05794	2.34823e-07	6.30944e-05
16212	SPC24	206.328	134.824	277.832	2.06069	1.04313	3.70472e-05	0.00395784
4558	DLGAP5	540.631	353.414	727.849	2.05948	1.04228	9.14168e-07	0.000184606
18192	UCP2	894.666	586.891	1202.44	2.04883	1.0348	2.36237e-07	6.30944e-05
6287	FZD4	753.917	497.148	1010.69	2.03297	1.02359	4.00303e-07	9.46945e-05
13255	POLD3	188.301	124.193	252.409	2.03239	1.02318	0.000101125	0.00881333
18731	XRCC2	139.84	92.444	187.236	2.0254	1.01821	0.000510376	0.0305101
3025	CDC45	220.574	145.856	295.293	2.02455	1.0176	5.52603e-05	0.0053512
7307	HIST1H2AH	863.378	571.923	1154.83	2.01921	1.01379	4.33022e-07	9.62584e-05
9785	C1orf233	134.141	89.2927	178.99	2.00453	1.00327	0.000678883	0.038631
3176	CENPF	447.657	299.601	595.713	1.98835	0.991573	4.64908e-06	0.000652408
8981	LIMD2	185.581	124.514	246.648	1.98088	0.986143	0.000202812	0.0152653
10139	LYZ	99959.2	67115.4	132803	1.97873	0.984572	3.3204e-08	1.16984e-05
13569	PRIM1	124.783	83.8327	165.734	1.97696	0.983285	0.000905408	0.0467241
13158	PLK4	112.843	75.9924	149.694	1.96985	0.978085	0.00113234	0.0541919
14318	RELN	949.378	639.448	1259.31	1.96937	0.977733	6.26062e-07	0.00013291
788	APOA5	557.837	375.99	739.685	1.9673	0.976215	3.31155e-06	0.00051732
72	ABCG2	259.104	175.354	342.855	1.95521	0.967325	5.29699e-05	0.005221
5421	FAM111B	271.956	184.073	359.839	1.95487	0.967073	4.09457e-05	0.00426427
3978	CTHRC1	150.322	102.121	198.523	1.94401	0.959032	0.000733915	0.0409189
566	AMACR	732.91	499.693	966.126	1.93344	0.951167	1.94825e-06	0.000343204
6543	GINS3	132.86	90.6212	175.098	1.9322	0.950245	0.000965914	0.0489131
3976	CTGF	1193	814.985	1571.02	1.92767	0.94686	5.98566e-07	0.000128723
4559	DLK1	3338.74	2287.72	4389.75	1.91883	0.94023	3.59847e-07	8.7628e-05
5682	FAM72D	125.264	86.3287	164.199	1.90203	0.927538	0.00201781	0.0818944
744	AP1M2	337.937	233.192	442.682	1.89836	0.924752	3.60804e-05	0.00387958
1281	B4GALNT4	184.677	127.866	241.489	1.8886	0.917318	0.00033319	0.0221578
799	APOC1	1561.22	1081.95	2040.49	1.88594	0.915285	1.23313e-06	0.000237434
16335	SREBF1	341.114	236.455	445.773	1.88524	0.914744	4.64555e-05	0.0047485
11902	ODAM	3188	2214.61	4161.4	1.87906	0.910014	7.82961e-07	0.000162063
8467	KIF20A	170.887	119.188	222.586	1.86752	0.901125	0.000931379	0.0478718
3272	CHAF1B	163.274	114.084	212.463	1.86233	0.897111	0.000933788	0.0478718
7085	H2AFX	1950.04	1366.74	2533.34	1.85357	0.890305	2.25345e-06	0.000384689
15509	SLC13A5	1226.41	859.619	1593.19	1.85337	0.890151	3.76061e-06	0.000566108
1790	TICRR	159.132	112.056	206.207	1.84021	0.87987	0.00119479	0.0563663
3674	COL9A2	182.09	128.281	235.899	1.83892	0.878862	0.000831894	0.0440107
6433	GCAT	172.405	121.982	222.828	1.82672	0.869257	0.00154969	0.0683455
7037	GTSE1	390.652	278.375	502.928	1.80665	0.85332	0.000148571	0.0118464
10659	MKI67	256.34	182.7	329.98	1.80613	0.852899	0.00026789	0.0189572
15036	SCMH1	772.825	553.012	992.638	1.79497	0.843957	1.93274e-05	0.00223806
5385	FADS2	5637.61	4036.44	7238.77	1.79335	0.842661	3.29489e-06	0.00051732
17487	TMSB4X	349.112	250.152	448.073	1.79121	0.840931	0.000215918	0.0159615
5761	FASN	10193.1	7304.39	13081.8	1.79095	0.840725	3.1291e-06	0.000498218
17033	TFPI	11039.8	7944.06	14135.5	1.77938	0.831375	3.84598e-06	0.000573744
5374	FABP1	3077.95	2220.68	3935.23	1.77208	0.825447	4.62326e-06	0.000652408
6542	GINS2	308.453	222.994	393.913	1.76648	0.820877	0.000446771	0.0276048
18220	UHRF1	707.653	511.956	903.35	1.76451	0.819266	4.84027e-05	0.0048872
516	ALDOC	577.502	417.929	737.074	1.76364	0.818554	8.92304e-05	0.00794391
6171	FOXM1	496.539	359.752	633.327	1.76045	0.815947	0.000143445	0.0116437
3271	CHAF1A	299.496	217.088	381.904	1.75921	0.814931	0.000556445	0.0327906
2850	CCNB1	715.859	519.011	912.707	1.75855	0.814385	5.00646e-05	0.00502437
18488	VSNL1	2863.89	2078.35	3649.43	1.75593	0.812232	4.99951e-06	0.000695688
13253	POLD1	253.502	184.131	322.873	1.7535	0.810237	0.000841891	0.0443977
10406	MCM4	1300.64	947.067	1654.21	1.74666	0.804601	2.40737e-05	0.00273039
6113	FN1	4630.11	3392.85	5867.36	1.72933	0.790216	1.07024e-05	0.00130309
5891	FEN1	343.615	252.189	435.042	1.72506	0.786647	0.000431219	0.0267436
13154	PLK1	2980.7	2189.47	3771.93	1.72276	0.784724	1.6296e-05	0.00190032
17453	TMEM97	1482.67	1089.73	1875.62	1.72118	0.7834	4.02331e-05	0.00421658
17078	THBS1	1136.57	835.356	1437.78	1.72116	0.783377	2.48401e-05	0.00274666
13664	PRR11	486.274	357.519	615.029	1.72027	0.782633	0.000239579	0.017174
4868	E2F1	1223.28	900.31	1546.24	1.71746	0.780273	4.44429e-05	0.00457099
914	ARHGEF40	226.029	166.391	285.668	1.71685	0.779767	0.00155271	0.0683455
3002	CDC20	426.138	313.9	538.377	1.71512	0.778312	0.000452658	0.0278537
16173	SPAG5	568.34	418.851	717.83	1.71381	0.777204	0.000244643	0.0174614
16276	SPON2	532.6	392.718	672.482	1.71238	0.776	0.000194881	0.0148062
346	ADRA2C	1178.08	870.214	1485.96	1.70757	0.771949	6.6478e-05	0.0062723
3823	CREBZF	613.356	453.164	773.549	1.707	0.771459	0.000149251	0.0118464
4789	DTL	361.078	266.84	455.316	1.70632	0.770892	0.00061799	0.0355767
3108	CDKN3	1057.78	782.312	1333.25	1.70425	0.769135	7.87144e-05	0.00720128
13243	PODXL2	329.837	244.108	415.565	1.70238	0.767556	0.000770411	0.0425106
14499	RMI2	288.069	213.518	362.619	1.69831	0.7641	0.000905757	0.0467241
13185	PLXNC1	275.606	204.309	346.903	1.69793	0.76378	0.000955708	0.0485447
10932	MSH6	382.965	284.206	481.724	1.69498	0.761272	0.00054586	0.0322818
2356	C8orf4	224.811	166.859	282.763	1.69462	0.760965	0.00168049	0.0727877
20033	LEPREL2	336.527	249.849	423.206	1.69385	0.760305	0.000774959	0.0425106
5694	FAM76A	229.851	170.687	289.015	1.69324	0.75979	0.00225646	0.0881245
15476	SKP2	566.676	421.12	712.232	1.69128	0.758117	0.000304779	0.0211165
7718	IFITM2	834.73	620.726	1048.73	1.68953	0.756621	0.000150235	0.0118464
18618	WEE1	707.574	526.393	888.755	1.68839	0.755644	0.000133091	0.0110193
10928	MSH2	525.984	391.577	660.39	1.68649	0.754022	0.000332607	0.0221578
5882	FDPS	2967.97	2209.98	3725.97	1.68597	0.753583	3.84965e-05	0.00406028
13174	PLTP	279.935	208.944	350.927	1.67952	0.748051	0.00152178	0.0677397
3986	CTNNBIP1	1263.04	948.364	1577.73	1.66363	0.734334	0.000135691	0.0111233
18502	VWA1	559.474	420.705	698.243	1.6597	0.730919	0.000568242	0.0332492
17955	TTF2	364.911	274.453	455.369	1.65919	0.730476	0.00100378	0.0502163
17274	TMEM135	952.507	717.869	1187.15	1.65371	0.725704	0.00020792	0.0155789
11082	MYBL2	1411.65	1064.27	1759.02	1.65279	0.724901	0.000169855	0.0132048
11832	NUP155	667.001	503.317	830.686	1.65042	0.722835	0.000419359	0.0261059
15013	SCD	27661	20890	34431.9	1.64825	0.720934	5.44918e-05	0.00531684
11287	NCAPD3	636.483	481.633	791.334	1.64302	0.716354	0.000470676	0.0285392
4055	CXCL16	1151.16	871.938	1430.38	1.64046	0.714101	0.000364456	0.0234754
6541	GINS1	376.975	285.61	468.34	1.63979	0.71351	0.001157	0.055054
4800	DTYMK	531.032	403.362	658.703	1.63303	0.707553	0.00104007	0.0512576
5398	FAM100B	725.978	551.711	900.245	1.63173	0.706405	0.000317283	0.0218004
7386	HLF	4568.09	3478.42	5657.75	1.62653	0.701795	0.000118131	0.0100831
7097	HABP4	488.212	372.451	603.973	1.62162	0.697434	0.00118515	0.0560711
15244	SERPINF2	3930.51	3001.92	4859.09	1.61866	0.694799	0.000150198	0.0118464
17583	TOMM6	2204.71	1686.98	2722.44	1.61379	0.690456	0.000236866	0.0170533
18102	UBE2C	1072.51	822.418	1322.6	1.60818	0.685433	0.000472235	0.0285392
7306	HIST1H2AG	1547.56	1186.9	1908.22	1.60773	0.685026	0.000327271	0.0220296
12350	ORC6	534.108	409.732	658.485	1.60711	0.684471	0.00106714	0.0519728
3758	CPD	1798.17	1379.59	2216.75	1.60682	0.684204	0.000220607	0.0162357
9970	LRPAP1	1505.5	1155.89	1855.11	1.60492	0.682499	0.000344002	0.0225507
8353	KIAA0101	793.366	609.471	977.261	1.60346	0.681185	0.000820303	0.0436765
17600	TOR3A	454.442	349.394	559.491	1.60132	0.679261	0.00143086	0.0649138
767	APBB2	565.437	436.939	693.935	1.58817	0.667367	0.00127699	0.0597335
18759	YIPF2	464.882	359.734	570.03	1.58459	0.664107	0.0022778	0.0887486
7329	HIST1H3C	9180.8	7105.61	11256	1.5841	0.663664	0.000221858	0.0162555
7607	HSPB1	2477.6	1917.65	3037.55	1.584	0.663571	0.00033489	0.0221818
1599	C10orf10	920.255	712.498	1128.01	1.58318	0.662823	0.000650215	0.0371273
191	ACSS3	814.168	630.969	997.366	1.58069	0.660555	0.00106332	0.0519396
17589	TOP2A	1798.08	1394.55	2201.6	1.57871	0.658751	0.000326858	0.0220296
17731	TRIM24	2947.34	2290.08	3604.6	1.57401	0.654442	0.000471988	0.0285392
565	ALYREF	2479.05	1929.79	3028.31	1.56924	0.650067	0.000489797	0.0294929
19542	ZWINT	493.548	384.789	602.306	1.56529	0.646431	0.00224411	0.0879406
10654	MIS18A	440.939	344.125	537.753	1.56267	0.644011	0.00245751	0.0939815
7299	HIST1H1E	6049.91	4723.69	7376.12	1.56152	0.642949	0.000454164	0.0278537
10317	MARCKS	462.292	361.148	563.436	1.56012	0.641661	0.0019721	0.0808315
3068	CDK1	580.976	453.971	707.981	1.55953	0.641112	0.00178159	0.074672
6302	GAA	1184.44	927.905	1440.97	1.55293	0.634993	0.00102891	0.0508586
19120	ZNF318	611.835	480.126	743.544	1.54864	0.631003	0.00160787	0.0704357
7324	HIST1H2BM	882.434	693.165	1071.7	1.5461	0.628635	0.00172539	0.0732583
17232	TMED4	1057.58	833.196	1281.96	1.53861	0.621623	0.00154366	0.0683455
7311	HIST1H2AM	2913.78	2301.19	3526.37	1.53242	0.615807	0.000896512	0.0465371
8941	LGMN	845.216	667.777	1022.65	1.53143	0.614879	0.00206117	0.0828421
17975	TTR	3937.56	3135.24	4739.88	1.51181	0.596273	0.000943513	0.0480727
17155	TK1	1622.01	1296.08	1947.94	1.50295	0.587793	0.00171526	0.0730208
13223	PNN	2055.42	1644.17	2466.67	1.50025	0.585207	0.00145591	0.0656904
15977	SND1	1766.99	1419.67	2114.3	1.48929	0.574622	0.00224645	0.0879406
4475	DHRS2	14145.9	11369.8	16922.1	1.48833	0.573694	0.0010992	0.0530662
12725	PDIA4	2336.67	1882.85	2790.49	1.48205	0.567598	0.00253117	0.0963531
18065	TYMS	3198.22	2582.24	3814.21	1.47709	0.56276	0.00209933	0.0841234
5384	FADS1	2386.13	1927.61	2844.65	1.47574	0.561438	0.00211337	0.0841234
13124	PLEKHB1	4507.3	3678.97	5335.62	1.4503	0.536352	0.00234836	0.0906445

## Sheet: 4x4 comparison
	id	baseMean	baseMeanA	baseMeanB	foldChange	log2FoldChange	pval	padj
1	SEC24B-AS1	4.08734	2.98723	5.18746	1.73655	0.796221	0.307535	1
2	A1BG	182.021	120.24	243.802	2.02763	1.01979	3.28727e-09	2.86786e-06
3	A1CF	295.04	313.206	276.873	0.883997	-0.177887	0.286245	1
4	GGACT	4.44482	4.76167	4.12797	0.866916	-0.206036	0.873356	1
5	A2M	41741.9	40659.5	42824.4	1.05325	0.0748428	0.482671	1
6	A2ML1	0	0	0	NA	NA	NA	NA
7	A2MP1	0.36711	0.448864	0.285356	0.635729	-0.653516	1	1
8	A4GALT	10.0044	9.54505	10.4637	1.09624	0.132562	0.827847	1
9	A4GNT	0	0	0	NA	NA	NA	NA
10	AAAS	505.842	486.985	524.699	1.07744	0.107613	0.457772	1
11	AACS	502.343	489.707	514.979	1.05161	0.0725965	0.64202	1
12	AADAC	50.1891	53.3511	47.0272	0.881467	-0.182021	0.354468	1
13	AADACL2	0.138267	0	0.276533	Inf	Inf	0.994787	1
14	AADACL3	0	0	0	NA	NA	NA	NA
15	AADACL4	0	0	0	NA	NA	NA	NA
16	AADAT	97.0907	99.6639	94.5175	0.948363	-0.0764887	0.782452	1
17	AAGAB	399.946	415.015	384.877	0.92738	-0.108768	0.424393	1
18	AAK1	19.4994	17.353	21.6458	1.24738	0.318901	0.488978	1
19	AAMP	1412.35	1333.05	1491.66	1.11898	0.162189	0.252486	1
20	AANAT	0	0	0	NA	NA	NA	NA
21	AARS	2026.55	2081.35	1971.76	0.947351	-0.0780296	0.513309	1
22	AARS2	178.668	169.041	188.294	1.1139	0.155615	0.332467	1
23	PTGES3L-AARSD1	16.5404	21.0494	12.0313	0.571574	-0.806987	0.0472122	0.680932
24	AASDH	25.469	25.5718	25.3663	0.991964	-0.0116401	0.998017	1
25	AASDHPPT	750.114	719.024	781.205	1.08648	0.11966	0.345585	1
26	AASS	51.1176	53.2488	48.9863	0.919951	-0.12037	0.703552	1
27	AATF	1592.7	1608.69	1576.7	0.980115	-0.0289763	0.667938	1
28	AATK	58.8743	65.4329	52.3157	0.799532	-0.322772	0.213703	1
29	ABAT	6184.34	6424.54	5944.14	0.925225	-0.112124	0.294771	1
30	ABCA1	630.76	626.118	635.401	1.01483	0.0212342	0.7639	1
31	ABCA10	2.05569	2.98761	1.12378	0.376147	-1.41063	0.226982	1
32	ABCA12	5.34523	5.13652	5.55395	1.08127	0.112725	1	1
33	ABCA13	0.127934	0.255868	0	0	#NAME?	1	1
34	ABCA17P	0	0	0	NA	NA	NA	NA
35	ABCA2	307.456	289.166	325.747	1.12651	0.171854	0.194715	1
36	ABCA3	52.3689	52.2964	52.4415	1.00277	0.0039975	0.723912	1
37	ABCA4	0.365613	0.255868	0.475359	1.85783	0.893618	0.988544	1
38	ABCA5	85.6526	103.377	67.9284	0.657096	-0.605823	0.00289183	0.162837
39	ABCA6	1.99642	3.18444	0.808391	0.253856	-1.97792	0.122352	0.896892
40	ABCA7	17.7248	14.3542	21.0955	1.46964	0.555464	0.141166	0.939567
41	ABCA8	0.284771	0.284185	0.285356	1.00412	0.00593059	1	1
42	ABCA9	1.40764	2.53874	0.276533	0.108925	-3.19859	0.0828087	0.818882
43	ABCB1	269.287	328.335	210.239	0.640317	-0.643142	7.28969e-05	0.0124084
44	ABCB10	589.638	526.107	653.169	1.24151	0.3121	0.037317	0.625361
45	ABCB11	0	0	0	NA	NA	NA	NA
46	ABCB4	48.2299	53.2861	43.1737	0.810224	-0.303608	0.28542	1
47	ABCB5	0	0	0	NA	NA	NA	NA
48	ABCB6	1322.17	1214.4	1429.94	1.17748	0.235704	0.0788049	0.806769
49	ABCB7	336.378	310.946	361.81	1.16358	0.218569	0.186332	0.998086
50	ABCB8	30.9969	29.2837	32.7101	1.11701	0.159638	0.590291	1
51	ABCB9	3.92932	5.02554	2.8331	0.56374	-0.826897	0.46781	1
52	ABCC1	581.554	568.118	594.991	1.0473	0.0666759	0.67514	1
53	ABCC10	312.384	325.426	299.342	0.919844	-0.120539	0.475636	1
54	ABCC11	1.07202	1.31443	0.8296	0.631147	-0.663952	0.70567	1
55	ABCC12	0	0	0	NA	NA	NA	NA
56	ABCC2	2945.38	3228.47	2662.3	0.82463	-0.27818	0.0238462	0.511992
57	ABCC3	287.769	307.145	268.392	0.873827	-0.194581	0.149393	0.951484
58	ABCC4	98.5138	104.318	92.7099	0.888726	-0.170189	0.553353	1
59	ABCC5	220.76	242.676	198.844	0.819381	-0.287394	0.0903311	0.834122
60	ABCC6	100.02	87.9317	112.109	1.27495	0.350444	0.0758344	0.798464
61	ABCC8	0	0	0	NA	NA	NA	NA
62	ABCC9	0.142093	0.284185	0	0	#NAME?	1	1
63	ABCD1	1092.59	1130.46	1054.73	0.933016	-0.100027	0.456666	1
64	ABCD2	0	0	0	NA	NA	NA	NA
65	ABCD3	1368.85	1348.87	1388.82	1.02961	0.0421033	0.789905	1
66	ABCD4	291.405	285.925	296.886	1.03834	0.054273	0.696618	1
67	ABCE1	2379.69	2361.87	2397.51	1.01509	0.0216083	0.948621	1
68	ABCF1	1942.3	1953.77	1930.82	0.988253	-0.017047	0.866786	1
69	ABCF2	993.283	985.117	1001.45	1.01658	0.0237224	0.957391	1
70	ABCF3	380.33	392.284	368.375	0.939052	-0.0907233	0.550174	1
71	ABCG1	0.24563	0.491261	0	0	#NAME?	0.717921	1
72	ABCG2	237.334	210.989	263.678	1.24972	0.32161	0.0203048	0.47173
73	ABCG4	0.108281	0	0.216563	Inf	Inf	0.994786	1
74	ABCG5	208.457	193.649	223.265	1.15294	0.205319	0.177415	0.990184
75	ABCG8	37.4864	37.3026	37.6703	1.00986	0.0141519	0.883557	1
76	ABHD1	24.6585	23.5431	25.7739	1.09476	0.130609	0.738879	1
77	ABHD10	95.8879	93.3272	98.4487	1.05488	0.0770745	0.795236	1
78	ABHD11	38.6768	38.0313	39.3223	1.03395	0.0481597	0.881327	1
79	ABHD12	971.91	974.569	969.251	0.994544	-0.00789311	0.920721	1
80	ABHD12B	0.101617	0.203234	0	0	#NAME?	1	1
81	ABHD13	90.6603	89.6889	91.6318	1.02166	0.0309192	0.926808	1
82	ABHD14A	147.652	139.818	155.485	1.11206	0.153229	0.368053	1
83	ABHD14B	595.724	568.484	622.963	1.09583	0.132027	0.34689	1
84	ABHD15	259.861	263.375	256.347	0.973316	-0.0390203	0.849944	1
85	ABHD16A	395.953	391.857	400.05	1.02091	0.0298505	0.819798	1
86	ABHD16B	73.8319	72.092	75.5717	1.04827	0.0680072	0.687744	1
87	ABHD2	848.461	826.529	870.394	1.05307	0.0746043	0.553985	1
88	ABHD3	587.773	531.139	644.407	1.21325	0.278882	0.0372293	0.625361
89	ABHD4	722.045	795.554	648.536	0.8152	-0.294774	0.0215593	0.486156
90	ABHD5	156.884	162.06	151.707	0.936117	-0.0952385	0.591533	1
91	ABHD6	171.091	178.954	163.228	0.912126	-0.132696	0.505575	1
92	ABHD8	144.624	132.356	156.892	1.18538	0.245349	0.177333	0.990184
93	ABI1	1024.09	1035.53	1012.64	0.977894	-0.0322505	0.768506	1
94	ABI2	271.571	262.668	280.473	1.06779	0.0946224	0.612016	1
95	ABI3	0	0	0	NA	NA	NA	NA
96	ABI3BP	0	0	0	NA	NA	NA	NA
97	ABL1	849.257	914.503	784.011	0.857309	-0.222113	0.0999923	0.850603
98	ABL2	276.888	317.428	236.349	0.744576	-0.425509	0.00807943	0.296165
99	ABLIM1	105.719	123.981	87.4565	0.705402	-0.503482	0.011009	0.35311
100	ABLIM2	0	0	0	NA	NA	NA	NA
101	ABLIM3	2.10225	3.14951	1.05499	0.334968	-1.5779	0.223659	1
102	ABO	0	0	0	NA	NA	NA	NA
103	ABP1	0	0	0	NA	NA	NA	NA
104	ABR	2.52863	2.05772	2.99954	1.4577	0.543695	0.856581	1
105	ABRA	0	0	0	NA	NA	NA	NA
106	ABT1	880.556	827.976	933.136	1.12701	0.172497	0.210199	1
107	ABTB1	66.2207	67.5726	64.8689	0.959989	-0.0589105	0.878475	1
108	ABTB2	545.479	548.714	542.243	0.988208	-0.0171137	0.726798	1
109	ACAA1	1607.05	1476.98	1737.11	1.17612	0.234037	0.0458881	0.671983
110	ACAA2	1160.66	1107.23	1214.09	1.09652	0.132927	0.307272	1
111	ACACA	399.969	371.334	428.604	1.15423	0.206928	0.125143	0.905117
112	ACACB	110.331	127.753	92.9086	0.727249	-0.459478	0.0147433	0.41214
113	ACAD10	117.251	120.535	113.966	0.945502	-0.0808478	0.679097	1
114	ACAD8	305.404	303.713	307.095	1.01113	0.0159729	0.843123	1
115	ACAD9	239.886	242.847	236.925	0.975613	-0.0356193	0.989114	1
116	ACADL	0.108281	0	0.216563	Inf	Inf	0.994786	1
117	ACADM	253.631	260.496	246.765	0.947291	-0.0781208	0.553393	1
118	ACADS	456.666	454.879	458.452	1.00786	0.0112892	0.932854	1
119	ACADSB	815.866	836.005	795.726	0.95182	-0.0712392	0.601746	1
120	ACADVL	802.996	799.046	806.947	1.00989	0.0141953	0.987351	1
121	ACAN	0	0	0	NA	NA	NA	NA
122	ACAP1	9.81741	11.2104	8.42445	0.751486	-0.412181	0.507539	1
123	ACAP2	170.996	170.132	171.859	1.01015	0.0145733	0.921702	1
124	ACAP3	331.88	324.108	339.653	1.04796	0.0675879	0.65684	1
125	ACAT1	734.311	717.49	751.132	1.04689	0.0661068	0.66938	1
126	ACAT2	3115.03	2978.96	3251.1	1.09135	0.126119	0.249574	1
127	ACBD3	960.416	901.481	1019.35	1.13075	0.17728	0.198855	1
128	ACBD4	238.109	240.86	235.358	0.977156	-0.0333385	0.924643	1
129	ACBD5	272.138	269.655	274.621	1.01842	0.0263311	0.843039	1
130	ACBD6	204.076	222.307	185.845	0.835985	-0.258452	0.163031	0.972103
131	ACBD7	20.6773	22.6633	18.6913	0.824739	-0.27799	0.44967	1
132	ASIC2	0	0	0	NA	NA	NA	NA
133	ASIC1	6.5338	7.36729	5.70031	0.773733	-0.370092	0.65452	1
134	ASIC3	3.27147	2.35321	4.18973	1.78043	0.832226	0.416073	1
135	ASIC5	0.142093	0.284185	0	0	#NAME?	1	1
136	ACCS	0.604204	0.733049	0.475359	0.648468	-0.624893	1	1
137	ACCSL	0	0	0	NA	NA	NA	NA
138	ACD	183.681	186.574	180.789	0.968991	-0.0454455	0.916398	1
139	ACE	0	0	0	NA	NA	NA	NA
140	ACE2	3.23695	3.96084	2.51306	0.634478	-0.656359	0.501219	1
141	ACER1	0.142093	0.284185	0	0	#NAME?	1	1
142	ACER2	143.351	145.258	141.444	0.973749	-0.0383778	0.911675	1
143	ACER3	131.16	137.526	124.795	0.907434	-0.140136	0.503616	1
144	ACHE	8.78351	7.88195	9.68507	1.22876	0.297209	0.659317	1
145	ACIN1	473.298	465.709	480.887	1.03259	0.0462687	0.751742	1
146	ACLY	7299.39	7389.72	7209.06	0.975552	-0.0357089	0.948371	1
147	ACMSD	0.101617	0.203234	0	0	#NAME?	1	1
148	ACN9	675.779	632.561	718.997	1.13664	0.184781	0.219465	1
149	ACO1	395.759	376.916	414.601	1.09998	0.137481	0.354057	1
150	ACO2	1058.88	1103.38	1014.38	0.919336	-0.121337	0.38399	1
151	ACOT11	61.8199	69.4128	54.2269	0.781224	-0.356191	0.186813	0.998369
152	ACOT12	0.506563	0.775446	0.237679	0.306507	-1.70601	0.782991	1
153	ACOT13	722.132	673.232	771.032	1.14527	0.195687	0.121026	0.895179
154	ACOT2	501.163	469.361	532.965	1.13551	0.183345	0.226291	1
155	ACOT4	0.280945	0	0.561889	Inf	Inf	0.686108	1
156	ACOT6	0.997338	1.05963	0.935044	0.882423	-0.180457	1	1
157	ACOT7	637.987	627.11	648.864	1.03469	0.0491979	0.744915	1
158	ACOT8	342.645	318.428	366.862	1.1521	0.204271	0.172995	0.984393
159	ACOT9	415.553	400.436	430.669	1.0755	0.105009	0.512144	1
160	ACOX1	1402.66	1425.27	1380.04	0.96827	-0.0465194	0.813606	1
161	ACOX2	141.842	149.523	134.16	0.897255	-0.156411	0.540061	1
162	ACOX3	84.7031	80.4223	88.9839	1.10646	0.145948	0.422474	1
163	ACOXL	0	0	0	NA	NA	NA	NA
164	ACP1	3765.22	3765.74	3764.69	0.999723	-0.000399509	0.985184	1
165	ACP2	275.826	260.43	291.222	1.11824	0.161229	0.328542	1
166	ACP5	45.0907	46.6307	43.5507	0.933949	-0.0985842	0.839074	1
167	ACP6	428.224	442.97	413.478	0.933422	-0.0993983	0.512377	1
168	ACPL2	58.8427	63.2245	54.4609	0.861389	-0.215263	0.43078	1
169	ACPP	0.695897	0.24563	1.14616	4.66621	2.22225	0.443981	1
170	ACPT	0.246548	0	0.493096	Inf	Inf	0.701563	1
171	ACR	12.7384	18.4335	7.04342	0.3821	-1.38798	0.00611798	0.249362
172	ACRBP	2.30349	2.85125	1.75573	0.615776	-0.699522	0.59462	1
173	ACRC	5.73775	4.41584	7.05966	1.59871	0.676911	0.278123	1
174	ACRV1	0	0	0	NA	NA	NA	NA
175	ACSBG1	1.4538	2.02023	0.887367	0.43924	-1.18692	0.613953	1
176	ACSBG2	0.407001	0.814001	0	0	#NAME?	0.486515	1
177	ACSF2	512.747	555.409	470.084	0.846373	-0.240634	0.0807279	0.812572
178	ACSF3	186.387	197.095	175.678	0.891335	-0.16596	0.305198	1
179	ACSL1	506.562	486.781	526.343	1.08127	0.11273	0.345742	1
180	ACSL3	1921.5	1776.82	2066.18	1.16285	0.21767	0.0835243	0.820585
181	ACSL4	3004.93	2660.56	3349.29	1.25887	0.332127	0.00819648	0.298547
182	ACSL5	587.7	568.119	607.281	1.06893	0.0961727	0.584478	1
183	ACSL6	8.51284	7.77242	9.25325	1.19052	0.251596	0.553276	1
184	ACSM1	4.38061	4.25671	4.5045	1.05821	0.081629	1	1
185	ACSM2A	8.48833	10.6342	6.3425	0.596426	-0.745585	0.211897	1
186	ACSM2B	53.4358	63.4131	43.4585	0.685323	-0.545144	0.0182839	0.444607
187	ACSM3	47.7674	43.2272	52.3075	1.21006	0.27508	0.219943	1
188	ACSM4	0	0	0	NA	NA	NA	NA
189	ACSM5	1.56838	1.14336	1.99341	1.74347	0.80196	0.708411	1
190	ACSS2	7.33044	7.60107	7.0598	0.92879	-0.106576	0.926365	1
191	ACSS3	679.511	611.431	747.591	1.22269	0.29006	0.0228617	0.504541
192	ACTA1	15.6326	12.8418	18.4233	1.43463	0.520679	0.27314	1
193	ACTA2	1246.26	1317.18	1175.34	0.892319	-0.164369	0.177721	0.990184
194	ACTB	54549.1	50975.3	58122.9	1.14022	0.189309	0.183927	0.994363
195	ACTBL2	0.237679	0	0.475359	Inf	Inf	0.705964	1
196	ACTC1	0	0	0	NA	NA	NA	NA
197	ACTG1	81758.9	75933.2	87584.5	1.15344	0.205945	0.124682	0.904054
198	ACTG2	1.08325	1.44802	0.718481	0.496182	-1.01106	0.704561	1
199	ACTL10	45.9509	44.0879	47.814	1.08452	0.117051	0.631644	1
200	ACTL6A	253.542	245.353	261.731	1.06676	0.0932302	0.59264	1
201	ACTL6B	0	0	0	NA	NA	NA	NA
202	ACTL7A	7.99455	7.33913	8.64997	1.17861	0.237087	0.703364	1
203	ACTL7B	1.16776	1.36707	0.968455	0.708418	-0.497327	0.871767	1
204	ACTL8	2.74281	3.2367	2.24892	0.694818	-0.525293	0.720017	1
205	ACTL9	0.380357	0	0.760715	Inf	Inf	0.480816	1
206	ACTN1	4409.4	4204.95	4613.84	1.09724	0.133877	0.302774	1
207	ACTN2	0	0	0	NA	NA	NA	NA
208	ACTN3	3.41055	4.36998	2.45112	0.5609	-0.834184	0.433691	1
209	ACTN4	10467.7	10570.2	10365.2	0.980611	-0.0282474	0.745562	1
210	ACTR10	527.196	519.458	534.933	1.02979	0.042353	0.797631	1
211	ACTR1A	722.148	737.2	707.096	0.959164	-0.0601504	0.595788	1
212	ACTR1B	1315.09	1231.75	1398.43	1.13532	0.1831	0.190357	1
213	ACTR2	4908.47	5099.82	4717.12	0.924959	-0.112539	0.39335	1
214	ACTR3	1675.68	1702.63	1648.73	0.968345	-0.0464075	0.695279	1
215	ACTR3B	25.1961	24.8854	25.5067	1.02497	0.0355747	0.934513	1
216	ACTR3BP2	2.13283	0.568371	3.69729	6.50506	2.70156	0.0338631	0.603471
217	ACTR3C	4.71652	6.24916	3.18387	0.509487	-0.972882	0.21851	1
218	ACTR5	204.626	201.65	207.602	1.02952	0.0419656	0.860062	1
219	ACTR6	150.094	143.218	156.97	1.09602	0.13228	0.552343	1
220	ACTR8	631.035	658.463	603.606	0.916689	-0.125495	0.31323	1
221	ACTRT1	0	0	0	NA	NA	NA	NA
222	ACTRT2	0.11884	0	0.237679	Inf	Inf	0.994787	1
223	ACVR1	401.198	400.534	401.862	1.00332	0.00477576	0.764799	1
224	ACVR1B	309.41	316.876	301.944	0.952878	-0.0696362	0.639023	1
225	ACVR1C	6.93235	9.72119	4.1435	0.426234	-1.23028	0.0745084	0.79595
226	ACVR2A	128.107	141.124	115.09	0.815524	-0.294201	0.132564	0.92306
227	ACVR2B	175.247	165.846	184.648	1.11337	0.154929	0.380873	1
228	ACVRL1	0	0	0	NA	NA	NA	NA
229	ACY1	387.409	385.691	389.126	1.00891	0.0127916	0.887325	1
230	ACY3	75.7139	73.3468	78.081	1.06454	0.0902369	0.658271	1
231	ACYP1	76.8043	71.6472	81.9614	1.14396	0.194034	0.316701	1
232	ACYP2	195.447	171.907	218.986	1.27386	0.349204	0.0322354	0.587847
233	ADA	89.8873	86.6653	93.1093	1.07436	0.103472	0.503058	1
234	ADAD1	0	0	0	NA	NA	NA	NA
235	ADAD2	0	0	0	NA	NA	NA	NA
236	ADAL	154.905	134.629	175.181	1.30121	0.379858	0.040003	0.63975
237	ADAM1A	37.6047	34.4824	40.727	1.1811	0.240125	0.419706	1
238	ADAM10	670.99	653.475	688.505	1.05361	0.0753344	0.619081	1
239	ADAM11	10.1602	13.3245	6.99588	0.52504	-0.9295	0.0662319	0.766982
240	ADAM12	0	0	0	NA	NA	NA	NA
241	ADAM15	632.177	622.201	642.153	1.03207	0.0455363	0.772021	1
242	ADAM17	399.525	391.403	407.647	1.0415	0.0586627	0.854235	1
243	ADAM18	0.11884	0	0.237679	Inf	Inf	0.994787	1
244	ADAM19	10.0998	13.5532	6.64647	0.490399	-1.02797	0.0526789	0.703696
245	ADAM2	0	0	0	NA	NA	NA	NA
246	ADAM20	0	0	0	NA	NA	NA	NA
247	ADAM21	0	0	0	NA	NA	NA	NA
248	ADAM21P1	0.784553	0	1.56911	Inf	Inf	0.149573	0.951484
249	ADAM22	23.6874	26.5461	20.8286	0.784621	-0.349933	0.339823	1
250	ADAM23	3.78018	4.69511	2.86524	0.61026	-0.712503	0.446844	1
251	ADAM28	0.122815	0.24563	0	0	#NAME?	1	1
252	ADAM29	0	0	0	NA	NA	NA	NA
253	ADAM30	0.11884	0	0.237679	Inf	Inf	0.994787	1
254	ADAM32	0.345961	0	0.691921	Inf	Inf	0.496149	1
255	ADAM33	0	0	0	NA	NA	NA	NA
256	ADAM6	0	0	0	NA	NA	NA	NA
257	ADAM7	0	0	0	NA	NA	NA	NA
258	ADAM8	0.757366	1.51473	0	0	#NAME?	0.164858	0.973235
259	ADAM9	2835.65	2718.77	2952.54	1.08599	0.119006	0.315536	1
260	ADAMDEC1	0	0	0	NA	NA	NA	NA
261	ADAMTS1	10.4002	9.26395	11.5365	1.24531	0.316509	0.531177	1
262	ADAMTS10	1.5273	2.32383	0.730775	0.314471	-1.669	0.308917	1
263	ADAMTS12	0	0	0	NA	NA	NA	NA
264	ADAMTS13	13.9111	13.269	14.5533	1.09679	0.133284	0.833799	1
265	ADAMTS14	0.101617	0.203234	0	0	#NAME?	1	1
266	ADAMTS15	0	0	0	NA	NA	NA	NA
267	ADAMTS16	0.101617	0.203234	0	0	#NAME?	1	1
268	ADAMTS17	1.34429	2.21323	0.475359	0.214781	-2.21906	0.254658	1
269	ADAMTS18	0	0	0	NA	NA	NA	NA
270	ADAMTS19	0	0	0	NA	NA	NA	NA
271	ADAMTS2	37.875	28.7645	46.9854	1.63345	0.707924	0.00976936	0.328949
272	ADAMTS20	0.108281	0	0.216563	Inf	Inf	0.994786	1
273	ADAMTS3	0.241655	0.24563	0.237679	0.96763	-0.0474721	1	1
274	ADAMTS4	93.9956	91.9648	96.0264	1.04416	0.0623486	0.970126	1
275	ADAMTS5	0	0	0	NA	NA	NA	NA
276	ADAMTS6	224.863	224.312	225.414	1.00491	0.00707095	0.714698	1
277	ADAMTS7	13.209	10.4306	15.9874	1.53275	0.616122	0.166381	0.975653
278	ADAMTS8	0.122815	0.24563	0	0	#NAME?	1	1
279	ADAMTS9	0.30485	0.609701	0	0	#NAME?	0.535528	1
280	ADAMTSL1	0.30485	0.609701	0	0	#NAME?	0.535528	1
281	ADAMTSL2	62.1404	61.1721	63.1087	1.03166	0.0449654	1	1
282	ADAMTSL3	11.5616	11.193	11.9303	1.06587	0.0920325	0.781594	1
283	ADAMTSL4	131.276	120.736	141.815	1.17459	0.232156	0.285342	1
284	ADAMTSL5	119.784	109.356	130.212	1.19072	0.251832	0.204863	1
285	ADAP1	285.648	270.589	300.708	1.11131	0.152264	0.361639	1
286	ADAP2	14.453	15.0822	13.8239	0.916574	-0.125677	0.808825	1
287	ADAR	2509.89	2446.14	2573.64	1.05212	0.073302	0.6258	1
288	ADARB1	189.948	187.88	192.016	1.02201	0.0314126	0.828586	1
289	ADARB2	0	0	0	NA	NA	NA	NA
290	ADAT1	290.433	300.041	280.825	0.935955	-0.0954883	0.539277	1
291	ADAT2	168.379	155.829	180.93	1.16108	0.215471	0.266181	1
292	ADAT3	24.3051	22.0026	26.6076	1.20929	0.274166	0.429951	1
293	ADC	0.101617	0.203234	0	0	#NAME?	1	1
294	ADCK1	56.8415	54.4059	59.2771	1.08953	0.123712	0.634214	1
295	ADCK2	117.839	102.447	133.231	1.30048	0.379045	0.0390901	0.636894
296	ADCK3	1693.71	1797.82	1589.6	0.884185	-0.17758	0.159386	0.968941
297	ADCK4	132.416	124.584	140.248	1.12573	0.170864	0.468546	1
298	ADCK5	74.3046	67.919	80.6902	1.18804	0.248579	0.21704	1
299	ADCY1	3.93277	5.35783	2.50771	0.468046	-1.09528	0.204747	1
300	ADCY10	0.62303	0.812934	0.433125	0.532792	-0.908355	0.836267	1
301	ADCY2	0	0	0	NA	NA	NA	NA
302	ADCY3	1.72272	1.21647	2.22898	1.83233	0.873683	0.503924	1
303	ADCY4	0.101617	0.203234	0	0	#NAME?	1	1
304	ADCY5	0.142678	0	0.285356	Inf	Inf	0.994788	1
305	ADCY6	139.634	133.195	146.073	1.09669	0.133152	0.463343	1
306	ADCY7	95.7102	91.0158	100.405	1.10316	0.141639	0.478713	1
307	ADCY8	0.108281	0	0.216563	Inf	Inf	0.994786	1
308	ADCY9	607.259	578.715	635.803	1.09865	0.135727	0.298329	1
309	ADCYAP1	0	0	0	NA	NA	NA	NA
310	ADCYAP1R1	0	0	0	NA	NA	NA	NA
311	ADD1	2016.72	1966.77	2066.68	1.0508	0.0714886	0.581122	1
312	ADD2	2.18455	1.58161	2.78749	1.76244	0.817575	0.437469	1
313	ADD3	68.9247	65.3206	72.5289	1.11035	0.151019	0.378625	1
314	ADH1A	0	0	0	NA	NA	NA	NA
315	ADH1B	0.623938	1.03131	0.216563	0.209987	-2.25163	0.601966	1
316	ADH1C	0.406467	0.812934	0	0	#NAME?	0.383928	1
317	ADH4	28.9848	24.4896	33.4801	1.36711	0.451131	0.146736	0.944346
318	ADH5	2736.52	2696.77	2776.27	1.02948	0.0419142	0.740802	1
319	ADH6	325.938	319.29	332.586	1.04164	0.0588569	0.625405	1
320	ADH7	0.142678	0	0.285356	Inf	Inf	0.994788	1
321	ADHFE1	3.21118	4.80423	1.61814	0.336816	-1.56997	0.179157	0.992093
322	ADI1	1108.39	1222.63	994.151	0.813122	-0.298457	0.0175793	0.439279
323	ADIG	0.108281	0	0.216563	Inf	Inf	0.994786	1
324	ADIPOQ	0.264908	0.529816	0	0	#NAME?	0.708685	1
325	ADIPOR1	1039.77	987.236	1092.31	1.10643	0.145917	0.354821	1
326	ADIPOR2	1431.06	1306.66	1555.45	1.1904	0.251452	0.0614636	0.74121
327	ADK	101.986	100.954	103.017	1.02043	0.0291731	0.912029	1
328	ADM	346.543	396.125	296.961	0.749666	-0.415679	0.00666098	0.261451
329	ADM2	0.570712	0	1.14142	Inf	Inf	0.310826	1
330	ADNP	379.135	384.743	373.526	0.970844	-0.042689	0.945691	1
331	ADNP2	647.678	691.602	603.753	0.872978	-0.195983	0.235986	1
332	ADO	428.201	439.026	417.376	0.950687	-0.0729574	0.598983	1
333	ADORA1	0.108281	0	0.216563	Inf	Inf	0.994786	1
334	ADORA2A	28.1648	28.6878	27.6419	0.963544	-0.0535782	0.980204	1
335	ADORA2B	213.622	206.651	220.592	1.06746	0.0941864	0.669446	1
336	ADORA3	0	0	0	NA	NA	NA	NA
337	ADPGK	403.012	354.419	451.605	1.27421	0.349607	0.0220885	0.492449
338	ADPRH	0.4803	0.9606	0	0	#NAME?	0.353879	1
339	ADPRHL1	7.20857	8.02354	6.39359	0.796854	-0.327612	0.74354	1
340	ADPRHL2	254.26	270.575	237.945	0.879406	-0.185399	0.231044	1
341	ADRA1A	0	0	0	NA	NA	NA	NA
342	ADRA1B	0.101617	0.203234	0	0	#NAME?	1	1
343	ADRA1D	4.58291	4.64926	4.51656	0.97146	-0.0417742	1	1
344	ADRA2A	0.285356	0	0.570712	Inf	Inf	0.684293	1
345	ADRA2B	1.31247	0.501498	2.12344	4.23419	2.08209	0.235012	1
346	ADRA2C	1054.05	889.674	1218.43	1.36953	0.45368	0.000490796	0.0490707
347	ADRB1	0	0	0	NA	NA	NA	NA
348	ADRB2	0.85541	1.49426	0.216563	0.14493	-2.78657	0.348507	1
349	ADRBK1	781.203	815.392	747.014	0.916141	-0.126359	0.348248	1
350	ADRBK2	76.9054	86.3709	67.4398	0.780816	-0.356945	0.0791982	0.80847
351	ADRM1	4347.36	4174.48	4520.24	1.08283	0.114804	0.438741	1
352	ADSL	1379.51	1414.86	1344.16	0.950034	-0.0739493	0.573866	1
353	ADSS	295.307	276.343	314.271	1.13725	0.185549	0.264047	1
354	ADSSL1	2.62762	2.91651	2.33874	0.801894	-0.318516	0.816705	1
355	AEBP1	0.942518	0.255868	1.62917	6.36722	2.67066	0.311826	1
356	AEBP2	451.19	421.301	481.079	1.14189	0.191421	0.173925	0.985614
357	AEN	1477.28	1635.34	1319.22	0.80669	-0.309914	0.019789	0.466044
358	AES	3111.09	3256.04	2966.14	0.910967	-0.13453	0.358449	1
359	AFAP1	41.3866	48.9006	33.8726	0.692683	-0.529733	0.0840644	0.821624
360	AFAP1L1	5.38971	6.88787	3.89156	0.564987	-0.82371	0.325927	1
361	AFAP1L2	0.101617	0.203234	0	0	#NAME?	1	1
362	AFF1	744.579	773.404	715.753	0.925458	-0.111761	0.360498	1
363	AFF2	0	0	0	NA	NA	NA	NA
364	AFF3	0.11884	0	0.237679	Inf	Inf	0.994787	1
365	AFF4	1059.8	1047.99	1071.6	1.02253	0.0321392	0.729728	1
366	AFG3L2	423.664	428.42	418.908	0.977798	-0.0323914	0.891966	1
367	AFM	15.2646	16.0033	14.5259	0.90768	-0.139744	0.825894	1
368	AFMID	391.744	376.136	407.352	1.08299	0.115023	0.486667	1
369	AFP	19045.9	19073.5	19018.4	0.997112	-0.00417229	0.807843	1
370	AFTPH	561.339	542.277	580.401	1.0703	0.0980182	0.466662	1
371	AGA	119.188	122.912	115.464	0.939403	-0.0901833	0.604139	1
372	AGAP1	334.913	331.191	338.635	1.02248	0.0320691	0.920763	1
373	AGAP11	0	0	0	NA	NA	NA	NA
374	AGAP2	12.2463	12.9897	11.5029	0.885539	-0.175371	0.778604	1
375	AGAP3	891.193	825.701	956.685	1.15863	0.212425	0.121581	0.896324
376	AGAP5	41.4355	48.6593	34.2117	0.703087	-0.508225	0.0749213	0.79595
377	AGAP6	103.946	113.296	94.5956	0.834944	-0.260248	0.188219	0.999298
378	AGAP7	19.9546	20.4215	19.4878	0.954277	-0.0675198	0.898605	1
379	AGBL1	0	0	0	NA	NA	NA	NA
380	AGBL2	4.78527	5.65716	3.91338	0.691756	-0.531664	0.508505	1
381	AGBL3	4.5755	7.23647	1.91452	0.264566	-1.9183	0.0154076	0.418244
382	AGBL4	0.220457	0.203234	0.237679	1.16949	0.225879	1	1
383	AGBL5	69.2719	70.7057	67.8381	0.959442	-0.0597324	0.75444	1
384	AGER	44.9175	43.1603	46.6746	1.08142	0.112931	0.69514	1
385	AGFG1	5.71362	6.18314	5.2441	0.84813	-0.237643	0.830038	1
386	AGFG2	5275.99	5678.83	4873.16	0.858127	-0.220737	0.0706843	0.783618
387	AGGF1	131.715	132.584	130.846	0.986888	-0.0190416	0.965752	1
388	AGK	2.78708	2.22347	3.35069	1.50697	0.591649	0.573111	1
389	AGL	330.024	336.606	323.443	0.960897	-0.0575469	0.855346	1
390	AGMAT	2900.02	2851.87	2948.16	1.03376	0.0479047	0.881496	1
391	AGMO	1.26054	2.01916	0.501919	0.248577	-2.00823	0.264768	1
392	AGPAT1	1680.87	1661.01	1700.73	1.02391	0.0340942	0.770999	1
393	AGPAT2	145.669	158.646	132.691	0.836397	-0.257741	0.145418	0.944053
394	AGPAT3	819.286	756.05	882.522	1.16728	0.223151	0.146317	0.944053
395	AGPAT4	0.239883	0.203234	0.276533	1.36067	0.444315	1	1
396	AGPAT5	523.431	491.684	555.178	1.12914	0.175219	0.213595	1
397	AGPAT6	601.712	622.969	580.456	0.931757	-0.101974	0.414563	1
398	AGPAT9	220.129	244.808	195.451	0.798386	-0.324841	0.0166994	0.430809
399	AGPHD1	32.5296	31.256	33.8032	1.0815	0.11303	0.672442	1
400	AGPS	928.559	973.786	883.331	0.907109	-0.140652	0.236886	1
401	AGR2	64.1166	64.6793	63.5539	0.982601	-0.0253223	0.950212	1
402	AGR3	0.142678	0	0.285356	Inf	Inf	0.994788	1
403	AGRN	1680.85	1568.97	1792.74	1.14262	0.192345	0.106206	0.86823
404	AGRP	0.853591	0.24563	1.46155	5.9502	2.57294	0.326455	1
405	AGT	20305.8	19694.5	20917.1	1.06208	0.0868909	0.493033	1
406	AGTPBP1	132.263	130.112	134.414	1.03307	0.0469321	0.611152	1
407	AGTR1	0.655217	0.757366	0.553067	0.73025	-0.453538	1	1
408	AGTR2	0	0	0	NA	NA	NA	NA
409	AGTRAP	455.786	458.952	452.619	0.986203	-0.0200437	1	1
410	AGXT	399.625	417.679	381.571	0.913551	-0.130443	0.410598	1
411	AGXT2	2.02223	4.04446	0	0	#NAME?	0.0040503	0.19782
412	AGXT2L1	126.67	161.042	92.297	0.573123	-0.803082	5.45036e-06	0.00144158
413	AGXT2L2	121.01	104.697	137.322	1.31162	0.391349	0.0469578	0.679544
414	AHCTF1	379.808	356.468	403.147	1.13095	0.177535	0.224195	1
415	AHCY	2542.34	2377.33	2707.35	1.13882	0.187542	0.141106	0.939567
416	AHCYL1	2050.91	2151.22	1950.59	0.906735	-0.141246	0.285076	1
417	AHCYL2	71.1087	84.6377	57.5798	0.680308	-0.555739	0.0190989	0.459228
418	AHDC1	65.1395	75.9334	54.3457	0.715702	-0.482569	0.0521705	0.70204
419	AHI1	108.911	121.688	96.1328	0.789992	-0.340089	0.0755698	0.798031
420	AHNAK	171.049	164.926	177.172	1.07425	0.103333	0.472668	1
421	AHNAK2	7.12749	9.40853	4.84645	0.515112	-0.957041	0.131344	0.919744
422	AHR	397.606	372.416	422.797	1.13528	0.183052	0.215154	1
423	AHRR	7.2889	7.85999	6.7178	0.854683	-0.226538	0.866023	1
424	AHSA1	710.615	743.255	677.976	0.912171	-0.132625	0.274647	1
425	AHSA2	258.748	239.954	277.542	1.15665	0.209953	0.135603	0.928724
426	AHSG	40341	38634.5	42047.5	1.08834	0.122131	0.267039	1
427	AHSP	0.250749	0.501498	0	0	#NAME?	0.715387	1
428	AICDA	0	0	0	NA	NA	NA	NA
429	AIDA	1176.06	1171.62	1180.49	1.00756	0.0108703	0.993881	1
430	AIF1	11.1148	9.33504	12.8947	1.38132	0.466045	0.295252	1
431	AIF1L	590.377	646.889	533.865	0.82528	-0.277045	0.0453026	0.669684
432	AIFM1	2466.54	2366.96	2566.11	1.08414	0.116547	0.416712	1
433	AIFM2	131.672	131.757	131.588	0.998713	-0.00185732	0.883492	1
434	AIG1	870.644	846.908	894.38	1.05605	0.0786822	0.584803	1
435	AIM1	311.243	311.076	311.409	1.00107	0.00154351	0.88673	1
436	AIM1L	13.3481	17.3855	9.31069	0.535543	-0.900926	0.0538413	0.711236
437	AIM2	0.138267	0	0.276533	Inf	Inf	0.994787	1
438	AIMP1	566.028	565.26	566.796	1.00272	0.003913	0.927171	1
439	AIMP2	778.828	780.509	777.146	0.99569	-0.00623077	0.938474	1
440	AIP	615.767	565.465	666.069	1.17791	0.236234	0.081984	0.816889
441	AIPL1	0	0	0	NA	NA	NA	NA
442	AIRE	0	0	0	NA	NA	NA	NA
443	AJAP1	0.345961	0	0.691921	Inf	Inf	0.496149	1
444	AJUBA	2076.61	2028.77	2124.44	1.04716	0.0664779	0.765566	1
445	AK1	451.978	414.327	489.628	1.18174	0.240918	0.0941385	0.838989
446	AK2	1554.04	1652.22	1455.86	0.881154	-0.182534	0.171454	0.984393
447	AK3	4280.75	4230.42	4331.07	1.02379	0.0339249	0.77728	1
448	AK4	3045.98	3059.22	3032.74	0.991345	-0.0125416	0.833428	1
449	AK5	0	0	0	NA	NA	NA	NA
450	AK7	0.673052	1.10842	0.237679	0.21443	-2.22142	0.591812	1
451	AK8	0.285356	0	0.570712	Inf	Inf	0.684293	1
452	AKAP1	647.305	647.502	647.108	0.999391	-0.000878637	0.976693	1
453	AKAP10	104.012	99.8877	108.136	1.08257	0.114465	0.66763	1
454	AKAP11	313.232	306.254	320.21	1.04557	0.0642876	0.566877	1
455	AKAP12	434.665	509.282	360.049	0.706974	-0.500271	0.000143171	0.0196912
456	AKAP13	37.0854	41.5812	32.5896	0.783757	-0.351522	0.275471	1
457	AKAP14	3.16544	2.56946	3.76143	1.4639	0.549819	0.679542	1
458	AKAP17A	566.386	565.378	567.394	1.00357	0.00513676	0.924539	1
459	AKAP3	0.108281	0	0.216563	Inf	Inf	0.994786	1
460	AKAP4	0	0	0	NA	NA	NA	NA
461	AKAP5	4.45238	5.17336	3.7314	0.721272	-0.471385	0.708915	1
462	AKAP6	5.4443	6.20639	4.68221	0.754418	-0.406563	0.621023	1
463	AKAP7	58.7879	60.1975	57.3782	0.953166	-0.069201	0.886302	1
464	AKAP8	761.103	767.616	754.59	0.983031	-0.0246906	0.834204	1
465	AKAP8L	477.649	503.367	451.93	0.897814	-0.155512	0.304751	1
466	AKAP9	191.031	188.506	193.555	1.02678	0.0381328	0.797692	1
467	AKD1	3.88318	3.86064	3.90573	1.01168	0.0167528	1	1
468	AKIP1	195.274	187.587	202.962	1.08196	0.113652	0.537513	1
469	AKIRIN1	3054.25	2958.16	3150.35	1.06497	0.0908139	0.420881	1
470	AKIRIN2	245.078	261.049	229.106	0.877635	-0.188306	0.198559	1
471	AKNA	49.6603	53.5695	45.7511	0.85405	-0.227607	0.402237	1
472	AKNAD1	0.280359	0.284185	0.276533	0.973074	-0.0393789	1	1
473	AKR1A1	474.684	477.875	471.492	0.986642	-0.0194019	0.865774	1
474	AKR1B1	2503.58	3288.74	1718.42	0.522516	-0.936452	3.84877e-14	6.61681e-11
475	AKR1B10	5899.3	7365.11	4433.48	0.601956	-0.73227	6.93328e-10	7.01159e-07
476	AKR1B15	0.101617	0.203234	0	0	#NAME?	1	1
477	AKR1C2	10252.7	9469.85	11035.5	1.16534	0.220746	0.162153	0.972103
478	AKR1C3	1460.25	1552.63	1367.88	0.881007	-0.182775	0.1082	0.875096
479	AKR1C4	3.82035	2.30335	5.33734	2.31721	1.21239	0.201387	1
480	AKR1CL1	0.487175	0.255868	0.718481	2.80801	1.48955	0.760411	1
481	AKR1D1	121.875	130.021	113.73	0.874702	-0.193136	0.39295	1
482	AKR1E2	0	0	0	NA	NA	NA	NA
483	AKR7A2	470.991	450.957	491.024	1.08885	0.122804	0.40154	1
484	AKR7A2P1	9.2731	8.63693	9.90928	1.14732	0.198262	0.824965	1
485	AKR7A3	25.2261	28.6075	21.8447	0.763601	-0.38911	0.336021	1
486	AKT1	760.115	699.832	820.398	1.17228	0.229314	0.0940796	0.838989
487	AKT1S1	299.429	289.897	308.96	1.06576	0.0918788	0.464008	1
488	AKT2	1855.89	1751.85	1959.93	1.11878	0.161923	0.204327	1
489	AKT3	4.8913	5.3238	4.4588	0.837521	-0.255803	0.885391	1
490	AKTIP	290.273	283.831	296.715	1.04539	0.064045	0.703931	1
491	ALAD	236.273	236.735	235.81	0.996092	-0.0056492	0.997399	1
492	ALAS1	351.784	371.849	331.718	0.892077	-0.16476	0.279652	1
493	ALAS2	0.127934	0.255868	0	0	#NAME?	1	1
494	ALB	143847	135653	152042	1.12082	0.16455	0.140368	0.93894
495	ALCAM	222.175	221.261	223.089	1.00826	0.0118703	1	1
496	ALDH16A1	418.794	386.251	451.338	1.16851	0.224669	0.112548	0.884159
497	ALDH18A1	4417.06	4400.08	4434.03	1.00772	0.0110884	0.886955	1
498	ALDH1A1	7378.45	7207.03	7549.87	1.04757	0.0670469	0.606306	1
499	ALDH1A2	0.432784	0.865569	0	0	#NAME?	0.372356	1
500	ALDH1A3	0	0	0	NA	NA	NA	NA
501	ALDH1B1	204.461	178.207	230.715	1.29464	0.372555	0.0371506	0.625361
502	ALDH1L1	38.8758	43.8285	33.923	0.773994	-0.369606	0.158478	0.967214
503	ALDH1L2	25.1004	24.0942	26.1066	1.08352	0.115724	0.709471	1
504	ALDH2	2611.43	2634.12	2588.74	0.982773	-0.0250702	0.616016	1
505	ALDH3A1	16.8883	21.7384	12.0383	0.553779	-0.852617	0.0342778	0.606904
506	ALDH3A2	48.4859	49.9211	47.0508	0.942505	-0.0854285	0.737496	1
507	ALDH3B1	29.134	27.1594	31.1085	1.1454	0.195856	0.53552	1
508	ALDH3B2	0	0	0	NA	NA	NA	NA
509	ALDH4A1	723.29	717.424	729.156	1.01635	0.0234009	0.877625	1
510	ALDH5A1	715.781	717.648	713.914	0.994797	-0.00752649	0.926185	1
511	ALDH6A1	22.1947	21.1961	23.1933	1.09422	0.129908	0.871635	1
512	ALDH7A1	777.036	742.783	811.288	1.09223	0.127274	0.369341	1
513	ALDH8A1	10.4998	16.6717	4.32797	0.259599	-1.94564	0.000353394	0.0384529
514	ALDH9A1	648.646	630.138	667.154	1.05874	0.0823503	0.522513	1
515	ALDOB	8.37036	9.93088	6.80983	0.685722	-0.544304	0.331679	1
516	ALDOC	592.863	556.464	629.261	1.13082	0.177369	0.102449	0.856136
517	ALG1	893.02	893.465	892.575	0.999003	-0.00143864	0.913607	1
518	ALG10	122.383	104.068	140.698	1.35199	0.435081	0.0158995	0.424448
519	ALG10B	110.976	92.5673	129.385	1.39774	0.483093	0.0116557	0.364998
520	ALG11	165.378	157.798	172.957	1.09607	0.132339	0.423628	1
521	ALG12	350.778	347.367	354.189	1.01964	0.0280584	0.783301	1
522	ALG13	95.79	90.8627	100.717	1.10846	0.148554	0.418551	1
523	ALG14	101.346	93.8701	108.823	1.15929	0.213241	0.310787	1
524	ALG1L	0.220457	0.203234	0.237679	1.16949	0.225879	1	1
525	ALG1L2	0	0	0	NA	NA	NA	NA
526	ALG2	652.861	628.608	677.115	1.07717	0.10724	0.60638	1
527	ALG3	49.8591	50.7407	48.9775	0.965249	-0.0510265	0.803896	1
528	ALG5	265.609	276.264	254.953	0.922858	-0.11582	0.492234	1
529	ALG6	106.747	112.509	100.986	0.897582	-0.155884	0.492438	1
530	ALG8	576.748	538.817	614.679	1.14079	0.190038	0.184876	0.995624
531	ALG9	698.46	683.033	713.888	1.04517	0.0637423	0.644355	1
532	ALK	0	0	0	NA	NA	NA	NA
533	ALKBH1	156.38	165.557	147.203	0.88914	-0.169518	0.30461	1
534	ALKBH2	123.134	126.148	120.12	0.952216	-0.0706396	0.693865	1
535	ALKBH3	150.268	157.573	142.963	0.90728	-0.140381	0.366813	1
536	ALKBH4	93.9426	81.0708	106.814	1.31754	0.397849	0.0706241	0.783618
537	ALKBH5	2142.38	2118.74	2166.02	1.02232	0.0318403	0.889795	1
538	ALKBH6	51.0894	44.0204	58.1585	1.32117	0.40182	0.0792858	0.80847
539	ALKBH7	202.918	184.111	221.725	1.2043	0.268194	0.0916177	0.836056
540	ALKBH8	321.743	321.621	321.865	1.00076	0.00109345	0.866006	1
541	ALLC	6.59242	10.9149	2.26994	0.207967	-2.26557	0.00119998	0.0937728
542	ALMS1	57.7747	54.9229	60.6265	1.10385	0.142542	0.617456	1
543	ALOX12	6.75588	5.69172	7.82004	1.37393	0.458313	0.615031	1
544	ALOX12B	1.76161	2.56706	0.956161	0.372473	-1.42479	0.349155	1
545	ALOX15	0.887026	0.865569	0.908484	1.04958	0.0698128	1	1
546	ALOX15B	0	0	0	NA	NA	NA	NA
547	ALOX5	0	0	0	NA	NA	NA	NA
548	ALOX5AP	0	0	0	NA	NA	NA	NA
549	ALOXE3	1.32863	1.8788	0.778452	0.414334	-1.27113	0.469959	1
550	ALPI	1.21518	1.73844	0.691921	0.398012	-1.32911	0.576782	1
551	ALPK1	18.8525	19.1905	18.5146	0.96478	-0.051728	0.779199	1
552	ALPK2	0.229551	0.459102	0	0	#NAME?	0.726295	1
553	ALPK3	1.21588	1.64101	0.790746	0.481864	-1.0533	0.576704	1
554	ALPL	18.6645	23.5119	13.8171	0.587664	-0.766937	0.0420353	0.654
555	ALPP	0.587616	0.24563	0.929601	3.78455	1.92012	0.583556	1
556	ALPPL2	0.508084	1.01617	0	0	#NAME?	0.274362	1
557	ALS2	313.73	315.98	311.48	0.985759	-0.0206936	0.961017	1
558	ALS2CL	0	0	0	NA	NA	NA	NA
559	ALS2CR11	0.224432	0.448864	0	0	#NAME?	0.729102	1
560	ALS2CR12	0.335402	0	0.670805	Inf	Inf	0.501268	1
561	ALS2CR8	10.3829	11.0881	9.6776	0.872792	-0.19629	0.805695	1
562	ALX1	0.142093	0.284185	0	0	#NAME?	1	1
563	ALX3	0	0	0	NA	NA	NA	NA
564	ALX4	0	0	0	NA	NA	NA	NA
565	ALYREF	2066.13	1777.64	2354.61	1.32457	0.405527	0.00127556	0.0987813
566	AMACR	759.332	744.579	774.086	1.03963	0.0560689	0.366989	1
567	AMBN	0	0	0	NA	NA	NA	NA
568	AMBP	14765.1	14548.5	14981.7	1.02977	0.0423287	0.615664	1
569	AMBRA1	240.772	267.95	213.595	0.797145	-0.327086	0.0308232	0.571026
570	AMD1	2348.18	2272.94	2423.43	1.06621	0.0924888	0.564172	1
571	AMDHD1	79.4765	69.3232	89.6297	1.29292	0.370639	0.0604315	0.740305
572	AMDHD2	127.155	121.294	133.016	1.09664	0.133091	0.357442	1
573	AMELX	0.101617	0.203234	0	0	#NAME?	1	1
574	AMELY	0.203234	0.406467	0	0	#NAME?	0.74153	1
575	AMFR	1085.01	1109.39	1060.64	0.956053	-0.0648373	0.50414	1
576	AMH	0.398546	0.511736	0.285356	0.557623	-0.842637	1	1
577	AMHR2	6.11484	4.14611	8.08358	1.94968	0.963235	0.209219	1
578	AMICA1	0	0	0	NA	NA	NA	NA
579	AMIGO1	9.33455	10.2786	8.39047	0.816303	-0.292823	0.783103	1
580	AMIGO2	0.138267	0	0.276533	Inf	Inf	0.994787	1
581	AMIGO3	124.1	129.434	118.766	0.917584	-0.124088	0.662395	1
582	AMMECR1	95.2439	94.4043	96.0835	1.01779	0.0254356	0.929537	1
583	AMMECR1L	611.871	609.873	613.869	1.00655	0.009422	0.894464	1
584	AMN	900.944	852.598	949.29	1.11341	0.154983	0.285026	1
585	AMN1	63.1998	61.0666	65.3331	1.06987	0.0974296	0.730897	1
586	AMOT	19.2829	18.0404	20.5254	1.13775	0.186179	0.762548	1
587	AMOTL1	1.05647	1.28334	0.8296	0.646438	-0.629416	0.845484	1
588	AMOTL2	566.601	634.158	499.044	0.78694	-0.345675	0.0142071	0.406219
589	AMPD1	0.651295	1.01723	0.285356	0.280521	-1.83382	0.596187	1
590	AMPD2	565.361	600.524	530.198	0.882892	-0.179691	0.240014	1
591	AMPD3	19.7589	24.168	15.3498	0.63513	-0.654876	0.0782178	0.805809
592	AMPH	0	0	0	NA	NA	NA	NA
593	AMT	164.298	175.419	153.177	0.873209	-0.195602	0.313602	1
594	AMTN	0	0	0	NA	NA	NA	NA
595	AMY2A	0	0	0	NA	NA	NA	NA
596	AMY2B	0	0	0	NA	NA	NA	NA
597	AMZ1	0.48934	0.97868	0	0	#NAME?	0.350671	1
598	AMZ2	359.575	358.676	360.475	1.00501	0.00721528	0.96674	1
599	AMZ2P1	17.8654	21.7272	14.0035	0.644514	-0.633715	0.179615	0.992398
600	ANAPC1	711.405	711.304	711.506	1.00028	0.000409946	0.951116	1
601	ANAPC10	198.624	196.818	200.43	1.01835	0.0262389	1	1
602	ANAPC11	6.64115	4.89089	8.39141	1.71572	0.778818	0.315802	1
603	ANAPC13	1093.53	1024.98	1162.08	1.13377	0.181124	0.198922	1
604	ANAPC16	749.867	739.519	760.216	1.02799	0.0398223	0.891972	1
605	ANAPC2	210.992	219.059	202.925	0.926348	-0.110373	0.527487	1
606	ANAPC4	116.8	118.009	115.591	0.979512	-0.0298644	0.860707	1
607	ANAPC5	930.63	934.828	926.432	0.991019	-0.0130154	0.973373	1
608	ANAPC7	560.885	561.546	560.223	0.997644	-0.00340289	0.953819	1
609	ANG	61.306	46.3248	76.2872	1.64679	0.719657	0.00169977	0.116424
610	ANGEL1	315.225	303.569	326.882	1.0768	0.106745	0.558014	1
611	ANGEL2	134.668	125.901	143.434	1.13927	0.188105	0.259742	1
612	ANGPT1	0	0	0	NA	NA	NA	NA
613	ANGPT2	5.03677	5.39691	4.67663	0.866537	-0.206666	1	1
614	ANGPT4	0	0	0	NA	NA	NA	NA
615	ANGPTL1	12.4118	13.5835	11.24	0.827476	-0.273211	0.690902	1
616	ANGPTL2	5.02849	5.778	4.27898	0.740564	-0.433304	0.675741	1
617	ANGPTL3	3.70578	3.93759	3.47396	0.882257	-0.18073	1	1
618	ANGPTL4	3.03477	3.48633	2.58322	0.740956	-0.43254	0.839446	1
619	ANGPTL5	0.24563	0.491261	0	0	#NAME?	0.717921	1
620	ANGPTL6	2.6053	2.82293	2.38768	0.845817	-0.241583	0.930049	1
621	ANGPTL7	0.996704	0	1.99341	Inf	Inf	0.0725606	0.792827
622	ANK1	7.89442	8.80469	6.98416	0.793231	-0.334186	0.689006	1
623	ANK2	6.97753	8.25349	5.70158	0.690809	-0.533642	0.507861	1
624	ANK3	0	0	0	NA	NA	NA	NA
625	ANKAR	6.07462	5.71881	6.43043	1.12444	0.169201	1	1
626	ANKDD1A	0.916087	0.284185	1.54799	5.44711	2.44549	0.31595	1
627	ANKFN1	0	0	0	NA	NA	NA	NA
628	ANKFY1	419.153	447.776	390.531	0.872157	-0.19734	0.158188	0.967214
629	ANKH	298.51	285.265	311.755	1.09286	0.128107	0.472331	1
630	ANKIB1	504.769	547.135	462.402	0.845133	-0.242749	0.0933338	0.837856
631	ANKK1	1.35496	1.92265	0.787275	0.409474	-1.28816	0.466956	1
632	ANKLE1	0.983954	0.9606	1.00731	1.04862	0.0684981	1	1
633	ANKLE2	967.322	961.69	972.955	1.01171	0.0168006	0.819716	1
634	ANKMY1	79.369	77.2344	81.5036	1.05528	0.077622	0.676856	1
635	ANKMY2	180.211	183.652	176.77	0.96253	-0.0550969	0.603734	1
636	ANKRA2	128.707	128.857	128.557	0.997673	-0.0033614	1	1
637	ANKRD1	59.0292	63.8448	54.2137	0.849149	-0.23591	0.481786	1
638	ANKRD10	278.018	275.259	280.776	1.02004	0.0286296	0.851716	1
639	ANKRD11	823.217	810.841	835.593	1.03053	0.0433813	0.742064	1
640	ANKRD12	1429.1	1421.54	1436.66	1.01064	0.0152658	0.896324	1
641	ANKRD13A	715.883	713.223	718.543	1.00746	0.0107216	0.998392	1
642	ANKRD13B	39.3146	35.8595	42.7698	1.19271	0.25424	0.395111	1
643	ANKRD13C	378.183	394.478	361.888	0.917386	-0.1244	0.442767	1
644	ANKRD13D	99.3868	98.9965	99.777	1.00788	0.0113294	1	1
645	ANKRD16	40.6489	44.5288	36.769	0.825736	-0.276248	0.334187	1
646	ANKRD17	953.512	980.333	926.69	0.945281	-0.081185	0.562407	1
647	ANKRD18A	126.732	133.592	119.872	0.897299	-0.15634	0.422172	1
648	ANKRD2	0.127934	0.255868	0	0	#NAME?	1	1
649	ANKRD20A4	1.276	1.45826	1.09375	0.750038	-0.414965	0.866734	1
650	ANKRD20A9P	42.0259	38.8997	45.1521	1.16073	0.215033	0.315449	1
651	ANKRD22	0	0	0	NA	NA	NA	NA
652	ANKRD23	51.2405	55.0618	47.4191	0.861198	-0.215582	0.502499	1
653	ANKRD24	4.05993	5.73556	2.3843	0.415705	-1.26637	0.200152	1
654	ANKRD26	114.763	117.167	112.359	0.958963	-0.0604531	0.828439	1
655	ANKRD26P1	0	0	0	NA	NA	NA	NA
656	ANKRD26P3	0.101617	0.203234	0	0	#NAME?	1	1
657	ANKRD27	105.72	103.135	108.305	1.05013	0.070572	0.743629	1
658	ANKRD28	130.93	119.248	142.612	1.19593	0.258131	0.164619	0.973235
659	ANKRD29	0.914951	1.59222	0.237679	0.149275	-2.74395	0.272255	1
660	ANKRD30A	0	0	0	NA	NA	NA	NA
661	ANKRD30B	0	0	0	NA	NA	NA	NA
662	ANKRD30BL	0	0	0	NA	NA	NA	NA
663	ANKRD31	0.534935	1.06987	0	0	#NAME?	0.335773	1
664	ANKRD32	48.023	47.3521	48.6939	1.02834	0.0403116	0.806859	1
665	ANKRD33	0	0	0	NA	NA	NA	NA
666	ANKRD33B	4.11962	5.60623	2.63301	0.469657	-1.09032	0.148732	0.949894
667	ANKRD34A	1.60831	2.06502	1.15161	0.557672	-0.842511	0.755465	1
668	ANKRD34B	0.101617	0.203234	0	0	#NAME?	1	1
669	ANKRD34C	0	0	0	NA	NA	NA	NA
670	ANKRD35	1.36157	2.24778	0.475359	0.211479	-2.24141	0.252697	1
671	ANKRD36	176.165	160.873	191.458	1.19012	0.251108	0.103653	0.859945
672	ANKRD36B	80.842	74.7651	86.919	1.16256	0.217306	0.209446	1
673	ANKRD37	27.862	26.8081	28.9159	1.07863	0.109194	0.80542	1
674	ANKRD39	189.905	175.996	203.814	1.15806	0.21171	0.185891	0.997763
675	ANKRD40	1263.73	1259.05	1268.42	1.00744	0.0106959	0.842996	1
676	ANKRD42	16.7928	18.7643	14.8212	0.789863	-0.340326	0.351006	1
677	ANKRD44	1.70921	1.74922	1.6692	0.954255	-0.0675535	1	1
678	ANKRD45	0.11884	0	0.237679	Inf	Inf	0.994787	1
679	ANKRD46	12.8123	13.1557	12.4688	0.947792	-0.0773581	0.829739	1
680	ANKRD49	71.2101	68.5121	73.9081	1.07876	0.109374	0.717988	1
681	ANKRD5	87.8114	81.091	94.5319	1.16575	0.221258	0.365508	1
682	ANKRD50	155.766	163.08	148.453	0.910307	-0.135575	0.566398	1
683	ANKRD52	409.802	421.95	397.655	0.942421	-0.0855564	0.582754	1
684	ANKRD53	6.52228	4.17938	8.86518	2.12117	1.08486	0.117589	0.892104
685	ANKRD54	1187.14	1208.2	1166.07	0.965125	-0.0512117	0.605187	1
686	ANKRD55	0	0	0	NA	NA	NA	NA
687	ANKRD6	1.32306	0.950362	1.69576	1.78433	0.835381	0.689754	1
688	ANKRD63	0.4148	0	0.8296	Inf	Inf	0.467248	1
689	ANKRD65	220.524	218.65	222.398	1.01714	0.0245201	0.848832	1
690	ANKRD7	0	0	0	NA	NA	NA	NA
691	ANKRD9	270.384	235.278	305.49	1.29842	0.37676	0.0209272	0.475934
692	ANKS1A	943.76	1030.45	857.066	0.831736	-0.265803	0.0580828	0.73101
693	ANKS1B	0	0	0	NA	NA	NA	NA
694	ANKS3	89.2325	93.9947	84.4703	0.898671	-0.154134	0.38422	1
695	ANKS4B	684.344	677.798	690.89	1.01932	0.0276023	0.962028	1
696	ANKS6	132.479	115.716	149.241	1.28972	0.367055	0.0444145	0.662825
697	ANKUB1	0.24563	0.491261	0	0	#NAME?	0.717921	1
698	ANKZF1	297.377	291.373	303.382	1.04121	0.0582676	0.675656	1
699	ANLN	843.884	785.78	901.989	1.14789	0.198984	0.117063	0.892104
700	ANO1	0	0	0	NA	NA	NA	NA
701	ANO10	199.213	228.817	169.609	0.741241	-0.431986	0.00656907	0.260093
702	ANO2	0.477495	0.284185	0.670805	2.36045	1.23906	0.76201	1
703	ANO3	6.8116	5.39532	8.22788	1.525	0.608812	0.51641	1
704	ANO4	0.285356	0	0.570712	Inf	Inf	0.684293	1
705	ANO5	1.58429	1.40946	1.75911	1.24807	0.319699	0.973834	1
706	ANO6	1223.07	1116.34	1329.8	1.19122	0.25244	0.0672855	0.772481
707	ANO7	0.237679	0	0.475359	Inf	Inf	0.705964	1
708	ANO8	153.735	150.484	156.986	1.04321	0.0610261	0.634977	1
709	ANO9	49.9186	53.5424	46.2948	0.864637	-0.209833	0.479922	1
710	ANP32A	1299.45	1173.63	1425.27	1.21442	0.280263	0.0269137	0.541736
711	ANP32AP1	2.53927	2.63633	2.44221	0.926367	-0.110344	1	1
712	ANP32B	2020.06	1945.79	2094.33	1.07634	0.10613	0.383899	1
713	ANP32C	10.3223	10.9759	9.66873	0.880906	-0.18294	0.909834	1
714	ANP32D	0.11884	0	0.237679	Inf	Inf	0.994787	1
715	ANP32E	430.072	402.534	457.611	1.13683	0.185012	0.227556	1
716	ANPEP	3135.61	2902.45	3368.77	1.16067	0.214952	0.0719347	0.790398
717	ANTXR1	160.663	165.001	156.325	0.947422	-0.0779204	0.702143	1
718	ANTXR2	459.653	484.656	434.649	0.89682	-0.15711	0.221868	1
719	ANXA1	0.92007	1.60246	0.237679	0.148322	-2.7532	0.271348	1
720	ANXA10	0.326049	0.652098	0	0	#NAME?	0.52372	1
721	ANXA11	880.075	818.869	941.281	1.14949	0.200992	0.169648	0.983008
722	ANXA13	379.742	387.089	372.396	0.962043	-0.0558273	0.573519	1
723	ANXA2	460.036	459.653	460.419	1.00167	0.00240347	0.990433	1
724	ANXA2P1	0.71798	0.9606	0.475359	0.494856	-1.01492	0.826036	1
725	ANXA2P3	0.437019	0.203234	0.670805	3.30066	1.72275	0.769132	1
726	ANXA3	181.565	184.522	178.608	0.967947	-0.0470007	0.685961	1
727	ANXA4	3008.45	3015.12	3001.79	0.995579	-0.00639183	0.729342	1
728	ANXA5	3867.86	3679.83	4055.88	1.10219	0.140377	0.363525	1
729	ANXA6	1556.97	1552.84	1561.1	1.00532	0.00765528	0.894613	1
730	ANXA7	1670.97	1687.92	1654.02	0.979914	-0.0292736	0.744814	1
731	ANXA8L1	0	0	0	NA	NA	NA	NA
732	ANXA8L2	0	0	0	NA	NA	NA	NA
733	ANXA9	414.374	389.195	439.552	1.12939	0.17554	0.191283	1
734	AOAH	0.366525	0.733049	0	0	#NAME?	0.503732	1
735	AOC2	42.4475	57.0481	27.847	0.488132	-1.03466	0.000280683	0.0319116
736	AOC3	213.361	255.814	170.909	0.668097	-0.58187	0.000498444	0.0495332
737	AOX1	302.083	328.42	275.746	0.839615	-0.252201	0.0608187	0.740305
738	AP1AR	63.7127	60.0168	67.4087	1.12316	0.167568	0.503985	1
739	AP1B1	1020.2	1036.69	1003.71	0.968187	-0.0466425	0.74249	1
740	AP1B1P1	0	0	0	NA	NA	NA	NA
741	AP1G1	1558.76	1622.13	1495.39	0.921866	-0.117371	0.328359	1
742	AP1G2	615.778	650.41	581.145	0.893505	-0.162452	0.307984	1
743	AP1M1	2129.86	2068.37	2191.36	1.05946	0.0833342	0.516325	1
744	AP1M2	295.573	248.08	343.066	1.38288	0.46768	0.00104879	0.0861281
745	AP1S1	395.501	405.354	385.648	0.951388	-0.0718948	0.607975	1
746	AP1S2	387.379	360.122	414.637	1.15138	0.203361	0.279488	1
747	AP1S3	102.655	109.361	95.9504	0.877376	-0.188733	0.371501	1
748	AP2A1	831.303	811.11	851.497	1.04979	0.070104	0.583825	1
749	AP2A2	975.518	1024.2	926.836	0.904937	-0.144111	0.232054	1
750	AP2B1	1402.08	1374.43	1429.74	1.04024	0.0569179	0.727989	1
751	AP2M1	4455.18	4301.77	4608.58	1.07132	0.0993919	0.523863	1
752	AP2S1	610.369	612.619	608.12	0.992656	-0.0106348	0.954618	1
753	AP3B1	433.331	432.132	434.53	1.00555	0.00798256	1	1
754	AP3B2	0.284185	0.568371	0	0	#NAME?	0.70022	1
755	AP3D1	1002.19	933.792	1070.59	1.1465	0.197236	0.15646	0.961348
756	AP3M1	530.665	525.931	535.399	1.018	0.0257399	0.822272	1
757	AP3M2	61.9297	61.7058	62.1536	1.00726	0.0104311	0.93703	1
758	AP3S1	368.938	367.426	370.449	1.00823	0.0118218	0.970031	1
759	AP4E1	94.8734	93.949	95.7978	1.01968	0.0281153	0.940877	1
760	AP4M1	39.7323	44.2382	35.2265	0.796292	-0.328631	0.269667	1
761	APAF1	144.293	132.8	155.786	1.17309	0.230315	0.242574	1
762	APBA1	0.412119	0.824239	0	0	#NAME?	0.484507	1
763	APBA2	17.3225	14.7373	19.9077	1.35083	0.433847	0.285055	1
764	APBA3	334.444	328.776	340.111	1.03447	0.0488987	0.747771	1
765	APBB1	5.32697	4.70919	5.94475	1.26237	0.336137	0.65921	1
766	APBB1IP	0	0	0	NA	NA	NA	NA
767	APBB2	504.655	440.998	568.313	1.2887	0.365915	0.00770445	0.287945
768	APBB3	0.536315	0	1.07263	Inf	Inf	0.320297	1
769	APC	185.482	190.18	180.784	0.950591	-0.073103	0.710156	1
770	APC2	4.83848	4.67171	5.00524	1.0714	0.099491	0.956571	1
771	APCDD1	9.60045	11.0254	8.17546	0.741508	-0.431466	0.329406	1
772	APCDD1L	0.108281	0	0.216563	Inf	Inf	0.994786	1
773	APCS	0	0	0	NA	NA	NA	NA
774	APEH	1253.69	1277.38	1230.01	0.962915	-0.0545203	0.729996	1
775	APEX2	117.176	125.195	109.157	0.871897	-0.197771	0.298033	1
776	APH1A	1192.14	1232.3	1151.97	0.934812	-0.0972523	0.494285	1
777	APH1B	17.5459	15.9512	19.1405	1.19994	0.262965	0.506825	1
778	API5	1105	1153.13	1056.87	0.916522	-0.125758	0.411115	1
779	APIP	434.364	445.437	423.291	0.950281	-0.0735741	0.551456	1
780	APLF	46.4566	46.3303	46.5828	1.00545	0.00784096	1	1
781	APLN	0.11884	0	0.237679	Inf	Inf	0.994787	1
782	APLNR	0	0	0	NA	NA	NA	NA
783	APLP1	58.844	58.6717	59.0164	1.00587	0.00845073	0.944226	1
784	APOA1	69163.8	66569.9	71757.8	1.07793	0.108265	0.36576	1
785	APOA1BP	546.639	481.027	612.251	1.2728	0.348004	0.0177786	0.439289
786	APOA2	75149.7	70036.4	80262.9	1.14602	0.196628	0.074609	0.79595
787	APOA4	180.568	170.305	190.831	1.12053	0.164177	0.297563	1
788	APOA5	489.243	425.49	552.996	1.29967	0.378145	0.00321406	0.173762
789	APOB	79667.8	78834.3	80501.3	1.02115	0.0301896	0.78634	1
790	APOBEC1	1.10343	1.18191	1.02495	0.867199	-0.205565	1	1
791	APOBEC2	1.28904	1.64848	0.929601	0.563915	-0.826451	0.866163	1
792	APOBEC3B	72.3214	68.8903	75.7525	1.09961	0.136992	0.549184	1
793	APOBEC3C	520.631	541.167	500.095	0.924105	-0.113872	0.449694	1
794	APOBEC3D	3.98814	4.69911	3.27716	0.697399	-0.519943	0.614085	1
795	APOBEC3F	59.4222	67.8304	51.0139	0.75208	-0.411043	0.0921697	0.836165
796	APOBEC3H	0.142093	0.284185	0	0	#NAME?	1	1
797	APOBEC4	0	0	0	NA	NA	NA	NA
798	APOBR	1.45684	1.68981	1.22387	0.724267	-0.465407	0.884259	1
799	APOC1	1277.37	1074.08	1480.66	1.37853	0.463129	0.000162172	0.0214279
800	APOC3	1617.85	1484.13	1751.57	1.1802	0.239032	0.0504043	0.691581
801	APOC4	0.108281	0	0.216563	Inf	Inf	0.994786	1
802	APOD	2.71836	1.49426	3.94247	2.63841	1.39967	0.171065	0.984393
803	APOE	20319.8	19614.6	21024.9	1.0719	0.10017	0.450929	1
804	APOF	66.8846	59.7967	73.9725	1.23707	0.306924	0.113496	0.88479
805	APOH	18734.7	17830.1	19639.2	1.10146	0.13942	0.349972	1
806	APOL1	310.892	305.417	316.366	1.03585	0.0508119	0.855828	1
807	APOL2	1.61406	1.27694	1.95117	1.528	0.611647	0.706308	1
808	APOL3	24.6095	27.4812	21.7379	0.791008	-0.338237	0.373902	1
809	APOL4	1.26811	2.03431	0.501919	0.246727	-2.01902	0.321146	1
810	APOL5	0	0	0	NA	NA	NA	NA
811	APOL6	51.2077	56.0147	46.4007	0.828366	-0.27166	0.244091	1
812	APOM	645.653	600.499	690.807	1.15039	0.202122	0.118183	0.892104
813	APOO	159.852	151.765	167.939	1.10658	0.146103	0.384686	1
814	APOOL	135.789	119.577	152.001	1.27116	0.346149	0.0803002	0.812366
815	APP	3428.22	3377.86	3478.58	1.02982	0.0423908	0.729965	1
816	APPBP2	1091.96	1137.72	1046.2	0.919555	-0.120992	0.372323	1
817	APPL1	247.249	227.427	267.071	1.17432	0.23182	0.123467	0.900187
818	APPL2	176.331	174.022	178.64	1.02653	0.0377819	0.834453	1
819	APRT	1978.76	2032.82	1924.69	0.946806	-0.0788594	0.532402	1
820	APTX	281.358	306.74	255.975	0.834502	-0.261013	0.0922155	0.836165
821	AQP10	6.66507	8.69702	4.63313	0.532725	-0.908536	0.222341	1
822	AQP11	46.5566	50.999	42.1142	0.825785	-0.276162	0.30342	1
823	AQP12A	0	0	0	NA	NA	NA	NA
824	AQP12B	0	0	0	NA	NA	NA	NA
825	AQP2	0	0	0	NA	NA	NA	NA
826	AQP3	89.432	101.425	77.4394	0.763516	-0.38927	0.0195171	0.463917
827	AQP4	8.78015	11.0135	6.54676	0.594428	-0.750425	0.218747	1
828	AQP5	0	0	0	NA	NA	NA	NA
829	AQP6	25.8054	27.7952	23.8156	0.856823	-0.222931	0.390895	1
830	AQP7	10.8651	12.2091	9.52101	0.779828	-0.358772	0.611902	1
831	AQP7P1	87.6795	94.7491	80.61	0.850774	-0.233153	0.280275	1
832	AQP8	1.31806	1.23455	1.40158	1.1353	0.183071	0.975909	1
833	AQP9	0.560718	1.12144	0	0	#NAME?	0.257558	1
834	AQPEP	2.82411	3.79377	1.85446	0.488818	-1.03263	0.309269	1
835	AQR	487.435	486.448	488.422	1.00406	0.00584171	0.981037	1
836	AR	0	0	0	NA	NA	NA	NA
837	ARAF	471.42	421.873	520.968	1.23489	0.304387	0.039859	0.639516
838	ARAP1	628.839	568.068	689.611	1.21396	0.279718	0.0481742	0.68301
839	ARAP2	4.67332	6.22062	3.12601	0.502524	-0.992737	0.19853	1
840	ARAP3	10.188	10.8315	9.54447	0.881174	-0.1825	0.627899	1
841	ARC	2.97946	4.40747	1.55146	0.352007	-1.50632	0.133967	0.924786
842	ARCN1	5892	5438.12	6345.87	1.16692	0.222712	0.0969109	0.843128
843	AREG	215.015	213.824	216.205	1.01114	0.0159779	0.788973	1
844	ARF1	6188.52	6284.53	6092.52	0.969446	-0.0447672	0.749519	1
845	ARF3	2947.36	2950.04	2944.68	0.998181	-0.00262605	0.987924	1
846	ARF4	5852.97	5828.21	5877.73	1.0085	0.0122068	0.919728	1
847	ARF5	1421.62	1348.8	1494.44	1.10798	0.147931	0.239476	1
848	ARF6	6.63001	6.2371	7.02292	1.12599	0.171196	0.87953	1
849	ARFGAP1	1076.34	1037.26	1115.41	1.07534	0.104795	0.514365	1
850	ARFGAP2	390.226	378.84	401.613	1.06011	0.0842156	0.492186	1
851	ARFGAP3	702.649	700.681	704.617	1.00562	0.00808052	0.83173	1
852	ARFGEF1	164.71	179.356	150.064	0.836685	-0.257243	0.164904	0.973235
853	ARFGEF2	1485.28	1508.39	1462.17	0.969354	-0.0449039	0.71101	1
854	ARFIP1	331.193	337.41	324.977	0.963149	-0.0541689	0.614131	1
855	ARFIP2	600.886	617.391	584.382	0.946535	-0.0792717	0.413607	1
856	ARFRP1	424.113	447.76	400.465	0.894375	-0.161049	0.293991	1
857	ARG1	9.80768	5.76098	13.8544	2.40486	1.26595	0.013469	0.397184
858	ARG2	1109.49	1169.4	1049.58	0.897534	-0.155961	0.186625	0.998086
859	ARGFX	0	0	0	NA	NA	NA	NA
860	ARGLU1	242.838	219.159	266.516	1.21609	0.282247	0.0831488	0.820112
861	ARHGAP1	1415.08	1477.02	1353.13	0.916126	-0.126382	0.353733	1
862	ARHGAP10	11.0237	14.4238	7.62366	0.528548	-0.919892	0.0844417	0.821894
863	ARHGAP11A	176.702	155.15	198.253	1.27782	0.353685	0.0334307	0.601217
864	ARHGAP11B	75.9811	72.9595	79.0027	1.08283	0.114807	0.459768	1
865	ARHGAP12	325.076	335.3	314.851	0.939015	-0.0907803	0.532637	1
866	ARHGAP15	0.360495	0.24563	0.475359	1.93526	0.952528	0.988511	1
867	ARHGAP17	1906.6	1926.91	1886.29	0.978921	-0.0307353	0.774214	1
868	ARHGAP18	3409.4	3408.81	3409.98	1.00035	0.000497977	0.979816	1
869	ARHGAP19	32.6633	35.5309	29.7957	0.838587	-0.253968	0.453364	1
870	ARHGAP20	0	0	0	NA	NA	NA	NA
871	ARHGAP21	339.822	376.035	303.608	0.807393	-0.308657	0.0428034	0.658207
872	ARHGAP22	0	0	0	NA	NA	NA	NA
873	ARHGAP23	6.9907	9.98345	3.99794	0.400456	-1.32028	0.0363926	0.621128
874	ARHGAP24	0.368446	0.736891	0	0	#NAME?	0.502857	1
875	ARHGAP25	0.285356	0	0.570712	Inf	Inf	0.684293	1
876	ARHGAP26	80.2479	85.0074	75.4885	0.888022	-0.171332	0.51599	1
877	ARHGAP27	215.507	236.003	195.012	0.82631	-0.275244	0.0804261	0.812366
878	ARHGAP28	0	0	0	NA	NA	NA	NA
879	ARHGAP29	377.767	383.514	372.021	0.970031	-0.0438973	0.942708	1
880	ARHGAP30	1.60736	2.7816	0.433125	0.155711	-2.68306	0.150249	0.951761
881	ARHGAP31	0.101617	0.203234	0	0	#NAME?	1	1
882	ARHGAP32	248.311	255.919	240.703	0.940542	-0.0884353	0.533553	1
883	ARHGAP33	30.7836	33.7796	27.7875	0.822613	-0.281714	0.467493	1
884	ARHGAP35	1551.4	1521.5	1581.3	1.0393	0.0556176	0.737249	1
885	ARHGAP36	0.216563	0	0.433125	Inf	Inf	0.717241	1
886	ARHGAP39	15.0975	17.0318	13.1632	0.772863	-0.371715	0.503049	1
887	ARHGAP4	0.447578	0.203234	0.691921	3.40456	1.76747	0.767204	1
888	ARHGAP40	16.9915	19.3382	14.6448	0.757299	-0.401065	0.284301	1
889	ARHGAP42	43.4289	50.0942	36.7637	0.733891	-0.446362	0.107386	0.872073
890	ARHGAP44	30.0824	26.9771	33.1877	1.23022	0.298913	0.372608	1
891	ARHGAP5	3286.78	3461.8	3111.76	0.898886	-0.15379	0.160147	0.970143
892	ARHGAP6	0	0	0	NA	NA	NA	NA
893	ARHGAP9	12.1661	16.3382	7.994	0.489283	-1.03126	0.0736814	0.79595
894	ARHGDIA	14.4347	15.6304	13.239	0.847003	-0.239561	0.603487	1
895	ARHGDIB	1.54418	2.09334	0.995014	0.475324	-1.07302	0.606328	1
896	ARHGDIG	1.42363	1.8788	0.968455	0.515464	-0.956057	0.616634	1
897	ARHGEF1	410.195	438.743	381.647	0.869865	-0.201136	0.169848	0.983046
898	ARHGEF10	1.26323	1.5703	0.956161	0.608903	-0.715716	0.739006	1
899	ARHGEF10L	878.142	905.822	850.462	0.938884	-0.0909811	0.545054	1
900	ARHGEF11	478.538	526.454	430.621	0.817965	-0.289888	0.0466659	0.678174
901	ARHGEF12	2746.33	2780.32	2712.34	0.975549	-0.0357134	0.821915	1
902	ARHGEF15	0.11884	0	0.237679	Inf	Inf	0.994787	1
903	ARHGEF16	261.412	271.942	250.883	0.92256	-0.116286	0.427559	1
904	ARHGEF17	507.589	488.803	526.375	1.07686	0.106837	0.437938	1
905	ARHGEF18	343.966	355.525	332.407	0.934974	-0.0970011	0.523946	1
906	ARHGEF19	52.7946	52.9448	52.6444	0.994326	-0.0082092	0.847705	1
907	ARHGEF2	135.559	140.228	130.891	0.933412	-0.0994138	0.492519	1
908	ARHGEF25	0	0	0	NA	NA	NA	NA
909	ARHGEF3	309.93	292.646	327.214	1.11812	0.161078	0.253981	1
910	ARHGEF33	0.613073	0.733049	0.493096	0.672664	-0.572042	1	1
911	ARHGEF35	0.464315	0.652098	0.276533	0.424067	-1.23763	0.790539	1
912	ARHGEF37	2.90568	4.50105	1.31031	0.291112	-1.78035	0.0906353	0.834122
913	ARHGEF38	0.237679	0	0.475359	Inf	Inf	0.705964	1
914	ARHGEF40	201.499	180.562	222.435	1.23191	0.300892	0.0391884	0.636894
915	ARHGEF5	31.4655	31.4875	31.4436	0.998606	-0.00201231	0.934176	1
916	ARHGEF6	0.11884	0	0.237679	Inf	Inf	0.994787	1
917	ARHGEF7	217.405	220.501	214.308	0.971915	-0.0410974	0.777781	1
918	ARHGEF9	15.8924	15.7023	16.0825	1.02421	0.0345152	1	1
919	ARID1A	976.504	1017.46	935.551	0.919499	-0.12108	0.505114	1
920	ARID1B	962.093	988.585	935.602	0.946405	-0.0794705	0.614975	1
921	ARID2	159.492	157.814	161.17	1.02127	0.0303578	0.824492	1
922	ARID3A	2800.9	2598.26	3003.55	1.15599	0.209126	0.133568	0.924786
923	ARID3B	231.219	228.627	233.812	1.02268	0.032356	0.932805	1
924	ARID3C	0.220457	0.203234	0.237679	1.16949	0.225879	1	1
925	ARID4A	506.886	558.071	455.701	0.816564	-0.292362	0.0612019	0.740305
926	ARID4B	167.146	184.308	149.984	0.813769	-0.297309	0.13138	0.919744
927	ARID5A	2.92062	1.84425	3.997	2.16728	1.11588	0.296287	1
928	ARID5B	289.99	294.502	285.478	0.969361	-0.0448947	0.996314	1
929	ARIH1	470.907	504.405	437.408	0.867176	-0.205604	0.152543	0.95381
930	ARIH2	1057.74	1021.92	1093.56	1.0701	0.0977518	0.483111	1
931	ARL1	2251.28	2195.83	2306.73	1.05051	0.0710858	0.662026	1
932	ARL10	0.974322	0.284185	1.66446	5.85695	2.55015	0.307089	1
933	ARL11	7.61624	5.3302	9.90228	1.85777	0.893572	0.126902	0.90854
934	ARL13A	0	0	0	NA	NA	NA	NA
935	ARL13B	72.2949	70.7145	73.8754	1.0447	0.0630884	0.801147	1
936	ARL14	2.18818	2.98707	1.38929	0.4651	-1.10439	0.483843	1
937	ARL15	56.0346	50.7309	61.3383	1.20909	0.273925	0.335582	1
938	ARL16	234.122	243.315	224.928	0.92443	-0.113363	0.515232	1
939	ARL17A	627.425	598.866	655.983	1.09537	0.131424	0.390105	1
940	ARL2	383.173	353.287	413.06	1.16919	0.225509	0.119634	0.894324
941	ARL2BP	1771.82	1774.7	1768.95	0.996763	-0.004677	0.954584	1
942	ARL3	374.878	343.571	406.184	1.18224	0.241526	0.0871685	0.827683
943	ARL4A	47.1687	42.0383	52.2992	1.24408	0.315085	0.235169	1
944	ARL4C	4.3903	4.95376	3.82685	0.772514	-0.372367	0.641917	1
945	ARL4D	32.6469	36.461	28.8327	0.790782	-0.338647	0.286006	1
946	ARL5A	777.469	745.272	809.666	1.0864	0.11956	0.392468	1
947	ARL5B	1683.87	1615.18	1752.55	1.08505	0.117758	0.372321	1
948	ARL5C	0	0	0	NA	NA	NA	NA
949	ARL6	8.55306	10.5204	6.58571	0.625993	-0.675781	0.32819	1
950	ARL6IP1	2597.61	2499.52	2695.71	1.07849	0.109013	0.323798	1
951	ARL6IP4	435.671	402.364	468.979	1.16556	0.22102	0.121182	0.8953
952	ARL6IP5	880.496	855.367	905.624	1.05876	0.0823697	0.565402	1
953	ARL6IP6	746.45	712.636	780.263	1.0949	0.130793	0.315829	1
954	ARL8A	433.386	416.809	449.964	1.07955	0.110425	0.437559	1
955	ARL8B	1688.4	1736.57	1640.23	0.944523	-0.0823424	0.486754	1
956	ARL9	2.17205	2.80485	1.53926	0.548785	-0.865687	0.484954	1
957	ARMC1	565.833	590.391	541.276	0.916809	-0.125306	0.384329	1
958	ARMC10	160.919	159.04	162.798	1.02363	0.0336929	0.897129	1
959	ARMC12	3.19902	2.25802	4.14003	1.83348	0.874583	0.361666	1
960	ARMC2	0.576423	0.936283	0.216563	0.2313	-2.11216	0.612816	1
961	ARMC3	0	0	0	NA	NA	NA	NA
962	ARMC4	0.101617	0.203234	0	0	#NAME?	1	1
963	ARMC5	170.002	175.051	164.952	0.942313	-0.0857223	0.466375	1
964	ARMC6	290.195	285.775	294.614	1.03093	0.0439479	0.646981	1
965	ARMC7	165.137	162.481	167.794	1.0327	0.0464237	0.862513	1
966	ARMC8	757.036	728.938	785.134	1.07709	0.107143	0.418075	1
967	ARMC9	162.098	177.909	146.286	0.82225	-0.282351	0.187382	0.999298
968	ARMCX1	0	0	0	NA	NA	NA	NA
969	ARMCX2	0	0	0	NA	NA	NA	NA
970	ARMCX3	101.707	95.7511	107.663	1.12441	0.169166	0.402473	1
971	ARMCX4	0.392842	0.785684	0	0	#NAME?	0.49226	1
972	ARMCX5	124.614	135.843	113.384	0.834668	-0.260726	0.140397	0.93894
973	ARMCX6	68.5372	76.513	60.5615	0.791518	-0.337305	0.146378	0.944053
974	ARMS2	0	0	0	NA	NA	NA	NA
975	ARNT	774.459	785.9	763.018	0.970884	-0.0426288	0.752758	1
976	ARNT2	15.2941	21.3987	9.18948	0.429441	-1.21947	0.00342101	0.179859
977	ARNTL	51.9594	59.8869	44.0318	0.73525	-0.443693	0.0916883	0.836056
978	ARPC1A	700.213	686.05	714.377	1.04129	0.0583729	0.832026	1
979	ARPC1B	1032.43	951.19	1113.67	1.17082	0.227518	0.110432	0.879073
980	ARPC2	11584.3	11189.2	11979.4	1.07063	0.0984545	0.551615	1
981	ARPC3	2395	2445.83	2344.17	0.958435	-0.0612478	0.684285	1
982	ARPC5	1512.44	1472.31	1552.57	1.05452	0.0765804	0.691982	1
983	ARPC5L	250.41	247.382	253.438	1.02448	0.0348917	0.885699	1
984	ACTRT3	21.9612	25.6466	18.2758	0.712603	-0.48883	0.128815	0.913232
985	ARPP19	1075.16	1031.95	1118.37	1.08375	0.116029	0.388248	1
986	ARPP21	0	0	0	NA	NA	NA	NA
987	ARR3	0	0	0	NA	NA	NA	NA
988	ARRB1	620.556	616.533	624.579	1.01305	0.0187057	0.965587	1
989	ARRB2	969.961	960.666	979.257	1.01935	0.0276527	0.780632	1
990	ARRDC1	275.82	270.81	280.829	1.037	0.0524101	0.677267	1
991	ARRDC2	73.0743	75.6111	70.5374	0.932897	-0.10021	0.631355	1
992	ARRDC3	28.8636	31.5492	26.178	0.829751	-0.26925	0.401664	1
993	ARRDC4	10.9617	8.71243	13.2111	1.51635	0.6006	0.257055	1
994	ARRDC5	0	0	0	NA	NA	NA	NA
995	ARSA	152.538	152.181	152.894	1.00468	0.00674234	0.84421	1
996	ARSB	855.089	886.589	823.589	0.92894	-0.106342	0.444093	1
997	ARSD	82.1234	91.3368	72.91	0.798255	-0.325079	0.146281	0.944053
998	ARSE	576.884	623.286	530.482	0.851106	-0.23259	0.145831	0.944053
999	ARSF	0.47083	0.487419	0.454242	0.931933	-0.101701	1	1
1000	ARSG	0.101617	0.203234	0	0	#NAME?	1	1
1001	ARSH	0.368446	0.736891	0	0	#NAME?	0.502857	1
1002	ARSI	431.038	441.502	420.575	0.952599	-0.0700597	0.834234	1
1003	ARSJ	0.49699	0.203234	0.790746	3.89082	1.96008	0.758826	1
1004	ARSK	53.1177	51.6333	54.6022	1.0575	0.0806568	0.764735	1
1005	ART1	0	0	0	NA	NA	NA	NA
1006	ART3	0	0	0	NA	NA	NA	NA
1007	ART4	112.02	106.21	117.831	1.10941	0.149799	0.497691	1
1008	ART5	0.609097	0.487419	0.730775	1.49928	0.584266	0.984457	1
1009	ARTN	0.393427	0.501498	0.285356	0.569007	-0.813482	1	1
1010	ARV1	127.849	114.711	140.987	1.22907	0.297564	0.0864088	0.826678
1011	ARVCF	138.688	134.449	142.926	1.06305	0.0882143	0.655021	1
1012	ARX	0.359241	0	0.718481	Inf	Inf	0.489996	1
1013	AS3MT	121.2	108.754	133.646	1.22889	0.297356	0.108484	0.875096
1014	ASAH1	737.239	736.677	737.801	1.00153	0.00219861	0.999932	1
1015	ASAH2	223.68	202.22	245.139	1.21224	0.27767	0.103775	0.86022
1016	ASAH2B	209.999	195.696	224.302	1.14618	0.196835	0.225876	1
1017	ASAP1	923.197	941.318	905.076	0.961499	-0.0566429	0.641869	1
1018	ASAP2	1351.39	1357.2	1345.59	0.991449	-0.0123895	0.853366	1
1019	ASAP3	113.451	107.118	119.783	1.11823	0.16122	0.344207	1
1020	ASB1	844.578	838.922	850.233	1.01348	0.0193217	0.73015	1
1021	ASB10	0	0	0	NA	NA	NA	NA
1022	ASB11	0.142093	0.284185	0	0	#NAME?	1	1
1023	ASB13	62.8973	66.212	59.5825	0.899876	-0.152202	0.562358	1
1024	ASB14	0.404196	0	0.808391	Inf	Inf	0.471254	1
1025	ASB15	0	0	0	NA	NA	NA	NA
1026	ASB16	1.07952	1.92136	0.237679	0.123704	-3.01504	0.198006	1
1027	ASB17	0	0	0	NA	NA	NA	NA
1028	ASB18	0	0	0	NA	NA	NA	NA
1029	ASB2	0	0	0	NA	NA	NA	NA
1030	ASB4	10.3983	9.50835	11.2883	1.1872	0.247565	0.674988	1
1031	ASB5	0	0	0	NA	NA	NA	NA
1032	ASB6	157.792	155.146	160.438	1.03411	0.0483876	0.766898	1
1033	ASB7	129.709	130.011	129.407	0.995353	-0.00671989	0.938494	1
1034	ASB8	192.387	184.043	200.732	1.09068	0.125226	0.513411	1
1035	ASB9	48.5465	56.1296	40.9635	0.729801	-0.454425	0.0935229	0.837856
1036	ASB9P1	31.6296	32.4101	30.8492	0.95184	-0.0712086	0.850849	1
1037	ASCC1	90.7328	96.7126	84.753	0.876339	-0.190439	0.295724	1
1038	ASCC2	615.676	618.621	612.732	0.990479	-0.0138014	0.888187	1
1039	ASCC3	1099.62	1046.51	1152.74	1.10151	0.139482	0.358355	1
1040	ASCL1	0	0	0	NA	NA	NA	NA
1041	ASCL3	0	0	0	NA	NA	NA	NA
1042	ASCL4	0.941527	0.736891	1.14616	1.5554	0.637289	0.812808	1
1043	ASF1A	1312.47	1301.41	1323.53	1.017	0.0243132	0.944654	1
1044	ASF1B	244.639	205.494	283.783	1.38098	0.465694	0.000718016	0.0665852
1045	ASGR1	5236.62	4851.32	5621.92	1.15884	0.212686	0.0889842	0.830519
1046	ASGR2	1566.91	1456.57	1677.24	1.1515	0.203514	0.118836	0.893712
1047	ASH1L	287.348	305.979	268.717	0.87822	-0.187346	0.274575	1
1048	ASH2L	641.957	688.336	595.578	0.865243	-0.208823	0.150604	0.952533
1049	ASIP	0	0	0	NA	NA	NA	NA
1050	ASL	1311.51	1313.72	1309.29	0.996631	-0.00486929	0.935743	1
1051	ASMT	0.947933	1.44162	0.454242	0.315091	-1.66616	0.532647	1
1052	ASMTL	58.4707	56.4143	60.5271	1.0729	0.101521	0.655581	1
1053	ASNA1	702.778	738.245	667.312	0.903916	-0.14574	0.290285	1
1054	ASNS	354.027	375.341	332.713	0.886428	-0.173925	0.0996981	0.849696
1055	ASNSD1	346.413	343.247	349.579	1.01845	0.0263731	0.890886	1
1056	ASPA	1.03902	1.79268	0.285356	0.159178	-2.65128	0.252319	1
1057	ASPDH	13.1875	12.9351	13.4398	1.03902	0.0552213	1	1
1058	ASPG	0	0	0	NA	NA	NA	NA
1059	ASPH	1615.81	1634.73	1596.89	0.976853	-0.0337861	0.879992	1
1060	ASPHD1	439.566	433.342	445.789	1.02872	0.0408522	0.822387	1
1061	ASPHD2	1.67078	1.50465	1.83691	1.22082	0.287848	0.974276	1
1062	ASPM	196.371	190.768	201.974	1.05874	0.0823527	0.43827	1
1063	ASPN	0.101617	0.203234	0	0	#NAME?	1	1
1064	ASPRV1	9.41278	11.0099	7.81563	0.709872	-0.49437	0.332616	1
1065	ASRGL1	249.872	245.716	254.028	1.03383	0.0479931	0.796645	1
1066	ASS1	1378.25	1446.94	1309.56	0.905058	-0.143919	0.172826	0.984393
1067	ASTE1	57.029	58.9156	55.1424	0.935956	-0.0954877	0.721905	1
1068	ASTL	0	0	0	NA	NA	NA	NA
1069	ASTN1	0	0	0	NA	NA	NA	NA
1070	ASTN2	0.142093	0.284185	0	0	#NAME?	1	1
1071	ASUN	401.272	410.052	392.493	0.957176	-0.0631433	0.623512	1
1072	ASXL1	448.86	475.512	422.208	0.887902	-0.171528	0.233797	1
1073	ASXL2	887.573	865.302	909.844	1.05148	0.0724156	0.640928	1
1074	ASXL3	0.108281	0	0.216563	Inf	Inf	0.994786	1
1075	ASZ1	0	0	0	NA	NA	NA	NA
1076	ATAD1	774.706	785.806	763.605	0.971748	-0.0413458	0.743677	1
1077	ATAD2	1500.92	1406.42	1595.42	1.13438	0.181905	0.107565	0.872239
1078	ATAD2B	88.1753	91.8097	84.5409	0.920828	-0.118996	0.679401	1
1079	ATAD3A	600.116	587.581	612.652	1.04267	0.0602792	0.553622	1
1080	ATAD3B	196.411	190.699	202.124	1.05991	0.0839407	0.663019	1
1081	ATAD3C	4.15772	4.28503	4.03041	0.94058	-0.0883773	1	1
1082	ATAD5	90.9128	87.604	94.2215	1.07554	0.10506	0.591998	1
1083	ATAT1	199.124	201.768	196.48	0.973793	-0.0383133	0.74693	1
1084	ATCAY	0	0	0	NA	NA	NA	NA
1085	ATE1	164.853	172.172	157.535	0.914989	-0.128174	0.550488	1
1086	ATF1	230.081	244.34	215.822	0.883286	-0.179048	0.295775	1
1087	ATF2	667.093	657.201	676.984	1.0301	0.0427876	0.842621	1
1088	ATF3	254.968	319.258	190.679	0.597256	-0.74358	7.6436e-06	0.00182512
1089	ATF4	4216.9	4269.51	4164.3	0.975359	-0.0359945	0.852871	1
1090	ATF5	685.777	679.142	692.412	1.01954	0.0279188	0.75403	1
1091	ATF6	677.621	750.254	604.987	0.806376	-0.310475	0.02836	0.553879
1092	ATF6B	753.015	804.623	701.406	0.87172	-0.198063	0.17007	0.983713
1093	ATF7	378.03	362.028	394.032	1.0884	0.122214	0.445049	1
1094	ATF7IP	117.452	106.247	128.656	1.21091	0.276094	0.171347	0.984393
1095	ATF7IP2	105.31	105.52	105.1	0.996024	-0.00574721	0.878606	1
1096	ATG10	69.579	68.1389	71.019	1.04227	0.0597251	0.80172	1
1097	ATG12	265.122	267.344	262.901	0.983381	-0.0241773	0.794378	1
1098	ATG13	1.0796	1.18191	0.977277	0.82686	-0.274284	1	1
1099	ATG14	106.121	109.423	102.82	0.939655	-0.0897968	0.762851	1
1100	ATG16L1	373.793	448.542	299.043	0.666701	-0.584889	9.21036e-05	0.0146615
1101	ATG16L2	25.9295	25.592	26.2669	1.02637	0.0375528	0.868244	1
1102	ATG2A	539.864	588.337	491.39	0.835218	-0.259775	0.074138	0.79595
1103	ATG2B	173.611	174.21	173.012	0.993127	-0.00995014	0.886299	1
1104	ATG3	456.003	473.256	438.751	0.92709	-0.109219	0.336974	1
1105	ATG4A	73.492	69.8025	77.1815	1.10571	0.144975	0.566155	1
1106	ATG4B	2120.07	2266.88	1973.26	0.870472	-0.20013	0.138321	0.934752
1107	ATG4C	102.737	103.445	102.028	0.986301	-0.0199005	0.986415	1
1108	ATG4D	41.6178	36.3938	46.8419	1.28709	0.364108	0.18141	0.993052
1109	ATG5	332.416	325.885	338.946	1.04008	0.0566935	0.77286	1
1110	ATG7	61.8406	60.0112	63.6699	1.06097	0.0853797	0.842222	1
1111	ATG9A	782.992	741.19	824.795	1.1128	0.154191	0.22765	1
1112	ATG9B	0	0	0	NA	NA	NA	NA
1113	ATHL1	176.887	176.458	177.315	1.00486	0.00699434	0.776776	1
1114	ATIC	6457.32	6508.69	6405.95	0.984215	-0.0229539	0.789602	1
1115	ATL1	8.46506	10.8178	6.11232	0.565025	-0.823614	0.200258	1
1116	ATL2	874.29	886.868	861.711	0.971634	-0.0415157	0.718817	1
1117	ATL3	0	0	0	NA	NA	NA	NA
1118	ATM	142.537	154.735	130.34	0.842342	-0.247522	0.238066	1
1119	ATMIN	555.928	616.259	495.598	0.804205	-0.314366	0.0221903	0.493526
1120	ATN1	1515.21	1444.95	1585.47	1.09725	0.133897	0.309492	1
1121	ATOH1	0	0	0	NA	NA	NA	NA
1122	ATOH7	0.244295	0.203234	0.285356	1.40408	0.489624	1	1
1123	ATOH8	4.04002	5.76243	2.31762	0.402195	-1.31403	0.15105	0.952899
1124	ATOX1	736.278	730.689	741.867	1.0153	0.0219012	0.90251	1
1125	ATP10A	7.91799	13.7172	2.11879	0.154463	-2.69467	3.61509e-05	0.00690562
1126	ATP10B	0.464315	0.652098	0.276533	0.424067	-1.23763	0.790539	1
1127	ATP10D	42.3053	31.2348	53.3758	1.70885	0.77303	0.00503844	0.223827
1128	ATP11A	1218.34	1210.64	1226.04	1.01272	0.0182311	0.908165	1
1129	ATP11B	222.279	223.218	221.339	0.991579	-0.0121997	0.749473	1
1130	ATP11C	211.504	220.794	202.213	0.915844	-0.126826	0.470665	1
1131	ATP12A	0.11884	0	0.237679	Inf	Inf	0.994787	1
1132	ATP13A1	513.573	476.917	550.229	1.15372	0.206296	0.140059	0.938537
1133	ATP13A2	471.739	449.571	493.906	1.09862	0.135688	0.308932	1
1134	ATP13A3	767.344	766.732	767.955	1.00159	0.00229922	0.935564	1
1135	ATP13A4	0.250749	0.501498	0	0	#NAME?	0.715387	1
1136	ATP13A5	0	0	0	NA	NA	NA	NA
1137	ATP1A1	28259.5	28695.4	27823.7	0.969624	-0.0445032	0.687154	1
1138	ATP1A2	0.586981	0.936283	0.237679	0.253854	-1.97793	0.610309	1
1139	ATP1A3	7.55743	13.0002	2.11462	0.16266	-2.62007	0.000110442	0.0162283
1140	ATP1A4	0	0	0	NA	NA	NA	NA
1141	ATP1B1	7445.69	7226.58	7664.8	1.06064	0.0849341	0.530443	1
1142	ATP1B2	1.13692	1.48657	0.787275	0.52959	-0.917053	0.699453	1
1143	ATP1B3	2135.38	2080.92	2189.85	1.05235	0.0736103	0.595872	1
1144	ATP1B4	0.138267	0	0.276533	Inf	Inf	0.994787	1
1145	ATP2A1	73.6235	78.7649	68.4822	0.869451	-0.201824	0.458797	1
1146	ATP2A2	3434.56	3458.82	3410.3	0.985973	-0.0203798	0.865648	1
1147	ATP2A3	2.24958	1.20623	3.29293	2.72993	1.44886	0.274093	1
1148	ATP2B1	617.5	596.326	638.673	1.07101	0.0989759	0.492996	1
1149	ATP2B2	26.8836	29.8995	23.8676	0.798262	-0.325066	0.250875	1
1150	ATP2B3	0.365388	0	0.730775	Inf	Inf	0.48725	1
1151	ATP2B4	95.2392	117.186	73.2919	0.62543	-0.677079	0.00154599	0.109447
1152	ATP2C1	0.531109	0.785684	0.276533	0.351965	-1.5065	0.778945	1
1153	ATP2C2	0.795483	1.31443	0.276533	0.210382	-2.24891	0.360628	1
1154	ATP4A	6.3487	4.88918	7.80822	1.59704	0.675402	0.294807	1
1155	ATP4B	0	0	0	NA	NA	NA	NA
1156	ATP5A1	3603.67	3722.9	3484.44	0.935949	-0.095498	0.490329	1
1157	ATP5B	7529.74	6972.55	8086.92	1.15982	0.213904	0.105486	0.865623
1158	ATP5C1	2700.59	2556.39	2844.8	1.11282	0.154216	0.285321	1
1159	ATP5D	1504.91	1326.11	1683.72	1.26967	0.344456	0.0115371	0.364091
1160	ATP5E	1262.62	1269.34	1255.91	0.989414	-0.0153539	0.873492	1
1161	ATP5EP2	0	0	0	NA	NA	NA	NA
1162	ATP5F1	1456.53	1459.8	1453.27	0.995525	-0.00647072	0.806903	1
1163	ATP5G1	823.773	743.864	903.681	1.21485	0.280774	0.0483014	0.683202
1164	ATP5G2	2438.01	2389.5	2486.52	1.0406	0.057416	0.603537	1
1165	ATP5G3	3059.21	2925.92	3192.49	1.09111	0.125792	0.359124	1
1166	ATP5H	2631.39	2514.78	2748.01	1.09274	0.12795	0.317883	1
1167	ATP5I	748.838	728.064	769.612	1.05707	0.0800649	0.543496	1
1168	ATP5J	90.9899	88.379	93.6008	1.05908	0.0828173	0.685257	1
1169	ATP5L	6685.33	6650.76	6719.91	1.0104	0.0149215	0.964286	1
1170	ATP5L2	31.0213	28.5655	33.4772	1.17194	0.228903	0.489824	1
1171	ATP5S	154.341	137.029	171.653	1.25268	0.325015	0.0830891	0.820112
1172	ATP5SL	813.975	801.305	826.645	1.03162	0.0449156	0.72566	1
1173	ATP6AP1	2659.34	2721.78	2596.89	0.954115	-0.0677654	0.665282	1
1174	ATP6AP1L	16.2649	16.1084	16.4214	1.01943	0.027763	1	1
1175	ATP6AP2	1180.5	1046.97	1314.02	1.25507	0.32777	0.0134119	0.396714
1176	ATP6V0A1	682.332	784.237	580.428	0.740118	-0.434174	0.00114347	0.0910114
1177	ATP6V0A2	85.4831	85.7568	85.2093	0.993616	-0.00924034	1	1
1178	ATP6V0A4	2.30237	3.51982	1.08492	0.308233	-1.69791	0.146198	0.944053
1179	ATP6V0B	504.424	507.156	501.691	0.989224	-0.0156312	0.949697	1
1180	ATP6V0C	4284.37	4213.92	4354.82	1.03344	0.0474494	0.659598	1
1181	ATP6V0CP3	0	0	0	NA	NA	NA	NA
1182	ATP6V0D1	488.841	517.592	460.091	0.888906	-0.169897	0.235344	1
1183	ATP6V0D2	0.930457	1.03131	0.8296	0.80441	-0.313996	1	1
1184	ATP6V0E1	5800.55	5797.85	5803.25	1.00093	0.00134293	0.857871	1
1185	ATP6V0E2	489.198	484.618	493.777	1.0189	0.027012	0.755479	1
1186	ATP6V1A	350.938	368.856	333.02	0.902845	-0.14745	0.365002	1
1187	ATP6V1B1	10.0705	9.27094	10.8701	1.17249	0.229581	0.676435	1
1188	ATP6V1B2	876.555	931.919	821.191	0.881183	-0.182486	0.171915	0.984393
1189	ATP6V1C1	409.233	392.949	425.518	1.08288	0.114876	0.452286	1
1190	ATP6V1C2	0	0	0	NA	NA	NA	NA
1191	ATP6V1D	395.974	376.808	415.14	1.10173	0.139766	0.420147	1
1192	ATP6V1E1	1394.62	1396.22	1393.01	0.997702	-0.00331904	0.948013	1
1193	ATP6V1E2	7.95718	7.14651	8.76785	1.22687	0.294985	0.703572	1
1194	ATP6V1F	11.1793	10.618	11.7406	1.10573	0.144994	0.72885	1
1195	ATP6V1G1	2091.1	1981.51	2200.69	1.11061	0.151356	0.282908	1
1196	ATP6V1G2	4.95786	4.82615	5.08957	1.05458	0.0766721	0.954979	1
1197	ATP6V1G3	0	0	0	NA	NA	NA	NA
1198	ATP6V1H	301.855	320.715	282.995	0.882388	-0.180514	0.260994	1
1199	ATP7A	47.4153	48.6725	46.1581	0.94834	-0.0765234	0.789283	1
1200	ATP7B	590.145	581.191	599.099	1.03081	0.0437838	0.667903	1
1201	ATP8A1	18.6236	17.7419	19.5053	1.09939	0.136707	0.760798	1
1202	ATP8A2	1.32276	0.743287	1.90223	2.55921	1.3557	0.528884	1
1203	ATP8B1	77.9471	70.9419	84.9522	1.19749	0.260014	0.231176	1
1204	ATP8B2	414.137	417.7	410.574	0.98294	-0.0248254	0.898743	1
1205	ATP8B3	247.33	262.456	232.204	0.884736	-0.176681	0.265033	1
1206	ATP8B4	4.04899	4.38006	3.71793	0.848831	-0.23645	0.77734	1
1207	ATP9A	150.315	124.585	176.045	1.41305	0.498817	0.00206769	0.130212
1208	ATP9B	98.3082	89.42	107.196	1.1988	0.261588	0.166192	0.975576
1209	ATPAF1	457.666	440.091	475.241	1.07987	0.110856	0.426303	1
1210	ATPAF2	101.433	96.471	106.395	1.10287	0.141262	0.557972	1
1211	ATPBD4	55.1426	57.7313	52.5539	0.910319	-0.135556	0.580645	1
1212	ATPIF1	276.238	313.909	238.566	0.759984	-0.395958	0.0145356	0.410744
1213	ATR	90.9451	82.4489	99.4414	1.2061	0.270346	0.212209	1
1214	ATRIP	42.2204	39.745	44.6958	1.12457	0.169368	0.480128	1
1215	ATRN	560.234	558.876	561.592	1.00486	0.00699289	0.878821	1
1216	ATRNL1	0.127934	0.255868	0	0	#NAME?	1	1
1217	ATRX	366.838	336.037	397.639	1.18332	0.242842	0.130889	0.919293
1218	ATXN1	361.947	392.01	331.885	0.846624	-0.240206	0.100479	0.852081
1219	ATXN10	1385.76	1351.77	1419.75	1.05029	0.0707911	0.485084	1
1220	ATXN1L	672.365	720.516	624.214	0.866342	-0.206991	0.141052	0.939567
1221	ATXN2	717.658	740.626	694.69	0.937978	-0.0923744	0.527679	1
1222	ATXN2L	3207.81	3360.49	3055.14	0.909134	-0.137435	0.239766	1
1223	ATXN3	129.207	134.008	124.406	0.928349	-0.107261	0.671745	1
1224	ATXN3L	0.227121	0	0.454242	Inf	Inf	0.711455	1
1225	ATXN7	16.6376	17.2788	15.9963	0.925776	-0.111264	0.837803	1
1226	ATXN7L1	62.487	67.6622	57.3117	0.847026	-0.239521	0.353884	1
1227	ATXN7L2	36.6218	38.2344	35.0092	0.915646	-0.127139	0.663086	1
1228	ATXN7L3	1340.42	1312.57	1368.27	1.04244	0.0599584	0.672328	1
1229	ATXN7L3B	1422.18	1457.78	1386.59	0.951167	-0.0722291	0.617804	1
1230	ATXN8OS	0.11884	0	0.237679	Inf	Inf	0.994787	1
1231	AUH	274.497	267.843	281.152	1.04969	0.069962	0.654434	1
1232	AUP1	1069.01	1078.25	1059.77	0.982868	-0.02493	0.83535	1
1233	AURKA	187.845	184.814	190.876	1.0328	0.0465665	0.612673	1
1234	AURKAIP1	1666.29	1550.28	1782.3	1.14967	0.201218	0.115938	0.890222
1235	AURKAPS1	28.8816	30.3291	27.4342	0.90455	-0.144728	0.624121	1
1236	AURKB	64.0721	60.4029	67.7413	1.12149	0.165417	0.440464	1
1237	AURKC	3.12098	2.56706	3.6749	1.43156	0.517589	0.680525	1
1238	AUTS2	1.13418	0.785684	1.48267	1.8871	0.916174	0.660868	1
1239	AVEN	123.95	125.018	122.882	0.982911	-0.0248673	0.970343	1
1240	AVIL	16.8322	17.3562	16.3081	0.939615	-0.0898587	0.91814	1
1241	AVL9	289.678	298.766	280.59	0.939162	-0.0905533	0.636622	1
1242	AVP	0	0	0	NA	NA	NA	NA
1243	AVPI1	414.873	461.598	368.148	0.797551	-0.326352	0.032244	0.587847
1244	AVPR1A	0	0	0	NA	NA	NA	NA
1245	AVPR1B	0.11884	0	0.237679	Inf	Inf	0.994787	1
1246	AVPR2	0.250749	0.501498	0	0	#NAME?	0.715387	1
1247	AWAT1	0	0	0	NA	NA	NA	NA
1248	AWAT2	0	0	0	NA	NA	NA	NA
1249	AXDND1	0	0	0	NA	NA	NA	NA
1250	AXIN1	248.589	246.695	250.484	1.01536	0.0219903	0.938469	1
1251	AXIN2	722.697	753.271	692.123	0.918823	-0.122141	0.382217	1
1252	AXL	26.0217	35.8473	16.1962	0.451811	-1.14621	0.001185	0.0934522
1253	AZGP1	1381.6	1280.66	1482.54	1.15763	0.211175	0.0991457	0.849671
1254	AZI1	98.3922	94.2421	102.542	1.08807	0.121777	0.472927	1
1255	AZI2	58.8966	60.7645	57.0286	0.938518	-0.0915431	0.674272	1
1256	AZIN1	1584.19	1579.78	1588.59	1.00558	0.00802381	0.966607	1
1257	AZU1	0.261082	0.24563	0.276533	1.12581	0.170964	1	1
1258	B2M	4784.96	4545.39	5024.52	1.10541	0.144581	0.272865	1
1259	B3GALNT1	0	0	0	NA	NA	NA	NA
1260	B3GALNT2	396.478	377.135	415.82	1.10258	0.140879	0.324346	1
1261	B3GALT1	0.652588	0.743287	0.561889	0.755952	-0.403633	1	1
1262	B3GALT2	0	0	0	NA	NA	NA	NA
1263	B3GALT4	3.58081	5.05386	2.10777	0.417061	-1.26167	0.256545	1
1264	B3GALT5	0	0	0	NA	NA	NA	NA
1265	B3GALT6	582.275	605.546	559.005	0.923141	-0.115377	0.449688	1
1266	B3GALTL	97.9841	98.1695	97.7987	0.996223	-0.00545934	1	1
1267	B3GAT1	0.11884	0	0.237679	Inf	Inf	0.994787	1
1268	B3GAT2	0.285356	0	0.570712	Inf	Inf	0.684293	1
1269	B3GAT3	96.3286	91.0091	101.648	1.1169	0.159498	0.396957	1
1270	B3GNT1	1164	1027.34	1300.65	1.26604	0.340319	0.010972	0.35258
1271	B3GNT2	153.886	148.092	159.68	1.07824	0.108681	0.599368	1
1272	B3GNT3	386.824	471.615	302.033	0.640421	-0.642907	6.5943e-06	0.00164303
1273	B3GNT4	0	0	0	NA	NA	NA	NA
1274	B3GNT5	0.620338	1.003	0.237679	0.236969	-2.07723	0.602751	1
1275	B3GNT6	0	0	0	NA	NA	NA	NA
1276	B3GNT8	0	0	0	NA	NA	NA	NA
1277	B3GNTL1	135.253	130.046	140.461	1.08009	0.111152	0.545409	1
1278	B4GALNT1	119.349	122.3	116.397	0.951735	-0.0713677	0.772493	1
1279	B4GALNT2	0.593795	0.694494	0.493096	0.710007	-0.494095	1	1
1280	B4GALNT3	98.1464	103.123	93.1698	0.903481	-0.146433	0.583801	1
1281	B4GALNT4	180.543	153.19	207.895	1.3571	0.440529	0.00491645	0.221731
1282	B4GALT1	646.548	631.026	662.07	1.0492	0.0692834	0.669369	1
1283	B4GALT2	875.066	781.979	968.153	1.23808	0.308107	0.0341274	0.606114
1284	B4GALT3	572.191	553.627	590.756	1.06706	0.0936479	0.635285	1
1285	B4GALT4	417.478	408.738	426.219	1.04277	0.0604176	0.516433	1
1286	B4GALT5	782.048	813.486	750.61	0.922708	-0.116055	0.324091	1
1287	B4GALT6	17.984	19.1348	16.8332	0.879717	-0.184889	0.66842	1
1288	B4GALT7	122.849	109.377	136.32	1.24633	0.31769	0.09603	0.841932
1289	NCR3LG1	500.934	475.94	525.929	1.10503	0.144087	0.283599	1
1290	B9D1	263.285	266.32	260.251	0.977213	-0.033255	1	1
1291	B9D2	33.0544	40.0033	26.1055	0.652584	-0.615765	0.049238	0.689398
1292	BAALC	0.108281	0	0.216563	Inf	Inf	0.994786	1
1293	BAAT	7.55965	6.38476	8.73453	1.36803	0.452097	0.478238	1
1294	BABAM1	406.6	392.411	420.788	1.07231	0.100728	0.530416	1
1295	BACE1	131.488	121.732	141.244	1.16028	0.214474	0.315178	1
1296	BACE2	0.138267	0	0.276533	Inf	Inf	0.994787	1
1297	BACH1	107.625	126.975	88.2756	0.695221	-0.524457	0.00492678	0.221731
1298	BACH2	0.216563	0	0.433125	Inf	Inf	0.717241	1
1299	BAD	374.43	380.072	368.789	0.970315	-0.0434747	0.743447	1
1300	BAG1	248.593	245.545	251.641	1.02483	0.0353793	0.919789	1
1301	BAG2	751.404	769.957	732.851	0.951808	-0.0712574	0.494	1
1302	BAG3	1210.34	1294.66	1126.02	0.869736	-0.20135	0.118278	0.892104
1303	BAG4	437.054	419.209	454.9	1.08514	0.117879	0.420146	1
1304	BAG5	7.00931	7.63868	6.37994	0.835215	-0.25978	0.794493	1
1305	BAG6	3038.39	2877.2	3199.58	1.11205	0.153219	0.256039	1
1306	BAHCC1	141.775	121.666	161.884	1.33056	0.412039	0.015879	0.424448
1307	BAHD1	281.962	272.311	291.613	1.07088	0.0987978	0.627523	1
1308	BAI1	0.772013	0.459102	1.08492	2.36315	1.24071	0.788114	1
1309	BAI2	0.142678	0	0.285356	Inf	Inf	0.994788	1
1310	BAI3	0.138267	0	0.276533	Inf	Inf	0.994787	1
1311	BAIAP2	726.182	758.407	693.957	0.915019	-0.128126	0.331146	1
1312	BAIAP2L1	1040.76	1004.69	1076.83	1.0718	0.100038	0.704767	1
1313	BAIAP2L2	320.656	356.881	284.431	0.796989	-0.327368	0.0247906	0.523587
1314	BAIAP3	13.3957	14.1997	12.5917	0.886758	-0.173387	0.936341	1
1315	BAK1	342.278	344.647	339.909	0.986253	-0.0199697	0.903544	1
1316	BAMBI	379.879	426.939	332.818	0.779544	-0.359298	0.0146944	0.41214
1317	BANF1	500.299	504.803	495.795	0.982157	-0.0259747	0.797651	1
1318	BANF2	2.69057	3.95844	1.4227	0.359408	-1.47631	0.20104	1
1319	BANK1	0.942947	1.66933	0.216563	0.12973	-2.94642	0.26739	1
1320	BANP	86.1105	94.3589	77.862	0.825168	-0.277239	0.152091	0.952899
1321	BAP1	1424.17	1471.03	1377.31	0.93629	-0.0949722	0.467818	1
1322	BARD1	185.796	172.112	199.479	1.159	0.212884	0.204588	1
1323	BARHL1	0	0	0	NA	NA	NA	NA
1324	BARHL2	0	0	0	NA	NA	NA	NA
1325	BARX1	0.122815	0.24563	0	0	#NAME?	1	1
1326	BARX2	2.26687	4.31719	0.216563	0.0501629	-4.31724	0.00912315	0.3175
1327	BASP1	0	0	0	NA	NA	NA	NA
1328	BASP1P1	0	0	0	NA	NA	NA	NA
1329	BATF	21.0329	23.7319	18.3339	0.772541	-0.372317	0.323903	1
1330	BATF2	4.14147	4.4561	3.82685	0.858788	-0.219626	0.789607	1
1331	BATF3	1.57006	1.3155	1.82461	1.38701	0.471981	0.832116	1
1332	BAX	2626.19	2588.55	2663.84	1.02909	0.041363	0.737035	1
1333	BAZ1A	499.894	489.079	510.708	1.04422	0.0624297	0.647227	1
1334	BAZ1B	419.037	432.376	405.697	0.938297	-0.091884	0.523794	1
1335	BAZ2A	1207.93	1280.82	1135.03	0.886175	-0.174336	0.232634	1
1336	BAZ2B	44.6519	53.3895	35.9143	0.672685	-0.571998	0.0518791	0.700083
1337	BBC3	83.0251	83.1826	82.8675	0.996213	-0.00547385	0.970749	1
1338	BBOX1	0.101617	0.203234	0	0	#NAME?	1	1
1339	BBS1	161.646	162.639	160.652	0.987788	-0.0177265	0.870283	1
1340	BBS10	38.1828	38.551	37.8146	0.980898	-0.0278245	1	1
1341	BBS12	26.2829	23.7936	28.7722	1.20924	0.2741	0.417229	1
1342	BBS2	565.812	558.838	572.787	1.02496	0.0355686	0.777974	1
1343	BBS4	138.864	132.557	145.171	1.09516	0.131137	0.412726	1
1344	BBS7	47.7114	44.9391	50.4837	1.12338	0.167847	0.618317	1
1345	BBS9	95.7297	102.311	89.1486	0.87135	-0.198676	0.308968	1
1346	BBX	605.334	620.995	589.673	0.949563	-0.074665	0.578549	1
1347	BCAM	2473.19	2553.67	2392.71	0.936969	-0.0939265	0.443305	1
1348	BCAN	0.408171	0.24563	0.570712	2.32346	1.21627	0.988801	1
1349	BCAP29	331.264	339.799	322.729	0.949763	-0.0743613	0.566727	1
1350	BCAP31	163.296	163.487	163.104	0.997658	-0.00338217	0.897501	1
1351	BCAR1	13.0577	13.6238	12.4917	0.916906	-0.125154	0.886409	1
1352	BCAR3	121.142	124.865	117.418	0.940358	-0.0887184	0.586081	1
1353	BCAS1	17.0485	16.9677	17.1292	1.00951	0.0136622	0.917696	1
1354	BCAS2	1027.74	1000.82	1054.67	1.0538	0.0756039	0.631838	1
1355	BCAS3	155.673	153.239	158.106	1.03176	0.0451113	0.681295	1
1356	BCAS4	58.1842	47.809	68.5595	1.43403	0.520074	0.0293592	0.558867
1357	BCAT1	933.324	1007.34	859.304	0.853039	-0.229316	0.0797487	0.811267
1358	BCAT2	51.6034	52.6398	50.5669	0.960622	-0.0579598	0.957496	1
1359	BCCIP	1509.02	1516.68	1501.37	0.989907	-0.0146358	0.797325	1
1360	BCDIN3D	8.73632	9.9151	7.55754	0.762226	-0.391709	0.608542	1
1361	BCHE	0	0	0	NA	NA	NA	NA
1362	BCKDHA	98.6855	98.6415	98.7294	1.00089	0.00128585	0.90607	1
1363	BCKDHB	81.3797	84.2906	78.4688	0.930932	-0.103252	0.663699	1
1364	BCKDK	860.443	805.395	915.491	1.1367	0.184848	0.169201	0.982102
1365	BCL10	159.225	172.73	145.719	0.843627	-0.245323	0.159077	0.968433
1366	BCL11A	0.227121	0	0.454242	Inf	Inf	0.711455	1
1367	BCL11B	2.50005	3.60861	1.39149	0.385602	-1.37481	0.206523	1
1368	BCL2	1.20157	1.65125	0.751892	0.455347	-1.13496	0.578315	1
1369	BCL2A1	1.69532	2.07687	1.31378	0.632579	-0.660683	0.750717	1
1370	BCL2L1	12088	11754.3	12421.7	1.05678	0.0796761	0.586419	1
1371	BCL2L10	0	0	0	NA	NA	NA	NA
1372	BCL2L11	261.251	261.671	260.83	0.996788	-0.0046413	0.986308	1
1373	BCL2L12	670.389	613.495	727.282	1.18547	0.245463	0.102624	0.856136
1374	BCL2L13	121.799	109.305	134.293	1.2286	0.29702	0.15801	0.967072
1375	BCL2L14	1.91651	1.43778	2.39523	1.66592	0.736323	0.719636	1
1376	BCL2L15	0.270612	0.255868	0.285356	1.11525	0.157363	1	1
1377	BCL3	74.544	99.3025	49.7856	0.501352	-0.996103	5.15363e-06	0.00138439
1378	BCL6	936.873	974.573	899.173	0.922633	-0.116172	0.408247	1
1379	BCL6B	0.41329	0.255868	0.570712	2.23049	1.15736	0.988829	1
1380	BCL7A	41.3284	46.679	35.9777	0.770746	-0.375672	0.229251	1
1381	BCL7B	245.86	235.034	256.686	1.09212	0.127134	0.541852	1
1382	BCL7C	376.003	357.565	394.442	1.10313	0.141607	0.307957	1
1383	BCL9	36.0683	44.3899	27.7468	0.625071	-0.677909	0.0164686	0.430809
1384	BCL9L	726.027	734.128	717.927	0.977931	-0.0321947	0.883866	1
1385	BCLAF1	1329.02	1292.36	1365.68	1.05674	0.0796157	0.521857	1
1386	BCMO1	0.55581	0.609701	0.501919	0.823221	-0.280648	1	1
1387	BCO2	2.56011	1.21647	3.90376	3.20909	1.68217	0.147247	0.94639
1388	BCOR	548.598	570.547	526.649	0.92306	-0.115503	0.426667	1
1389	BCORL1	6.06299	5.82146	6.30453	1.08298	0.115007	0.878268	1
1390	BCR	547.379	567.987	526.77	0.927433	-0.108685	0.540753	1
1391	BCRP2	1.10494	0.406467	1.80341	4.43678	2.14951	0.387203	1
1392	BCRP3	241.587	248.738	234.436	0.9425	-0.0854361	0.638937	1
1393	BCS1L	398.297	405.776	390.818	0.963138	-0.0541862	0.771185	1
1394	BDH1	632.182	678.19	586.173	0.86432	-0.210362	0.143715	0.940649
1395	BDH2	123.808	117.529	130.087	1.10685	0.146466	0.494559	1
1396	BDKRB1	0.493322	0.255868	0.730775	2.85606	1.51403	0.759414	1
1397	BDKRB2	0.81731	1.63462	0	0	#NAME?	0.12244	0.896892
1398	BDNF	0	0	0	NA	NA	NA	NA
1399	BDP1	271.779	278.513	265.044	0.951641	-0.0715101	0.605701	1
1400	BEAN1	2.6892	2.58754	2.79087	1.07858	0.109134	0.964396	1
1401	BECN1	1248.71	1268.68	1228.73	0.968514	-0.0461556	0.744974	1
1402	BEGAIN	0.11884	0	0.237679	Inf	Inf	0.994787	1
1403	BEND2	0	0	0	NA	NA	NA	NA
1404	BEND3	105.817	107.706	103.929	0.964929	-0.0515051	0.765169	1
1405	BEND4	0.122815	0.24563	0	0	#NAME?	1	1
1406	BEND5	0.108281	0	0.216563	Inf	Inf	0.994786	1
1407	BEND6	0.603535	0.203234	1.00384	4.93933	2.30431	0.580143	1
1408	BEND7	0.266201	0.255868	0.276533	1.08077	0.112054	1	1
1409	BEST1	2.79195	3.38623	2.19768	0.649004	-0.623701	0.559088	1
1410	BEST2	0	0	0	NA	NA	NA	NA
1411	BEST3	0	0	0	NA	NA	NA	NA
1412	BEST4	1.54779	1.80292	1.29266	0.716984	-0.479986	0.881071	1
1413	BET1	471.714	471.681	471.748	1.00014	0.000204544	0.881206	1
1414	BET1L	649.265	693.301	605.229	0.872967	-0.196001	0.168183	0.97947
1415	BET3L	0.122815	0.24563	0	0	#NAME?	1	1
1416	BEX1	151.783	155.413	148.153	0.953287	-0.0690181	0.834026	1
1417	BEX2	0.246774	0.255868	0.237679	0.928914	-0.106382	1	1
1418	BEX4	0	0	0	NA	NA	NA	NA
1419	BEX5	0.108281	0	0.216563	Inf	Inf	0.994786	1
1420	BFAR	1053.04	989.427	1116.66	1.12859	0.174521	0.24959	1
1421	BFSP1	11.6987	13.4814	9.91599	0.73553	-0.443144	0.364707	1
1422	BFSP2	0	0	0	NA	NA	NA	NA
1423	BGLAP	41.5033	38.4238	44.5829	1.1603	0.214492	0.55937	1
1424	BGN	0.896392	1.50743	0.285356	0.1893	-2.40125	0.275613	1
1425	BHLHA15	68.4472	53.6063	83.288	1.5537	0.635707	0.0115642	0.364091
1426	BHLHB9	0	0	0	NA	NA	NA	NA
1427	BHLHE22	0.335402	0	0.670805	Inf	Inf	0.501268	1
1428	BHLHE23	0	0	0	NA	NA	NA	NA
1429	BHLHE40	2120.42	2357	1883.83	0.799251	-0.323279	0.0126601	0.383866
1430	BHLHE41	2.80801	3.06072	2.5553	0.834869	-0.260378	0.829371	1
1431	BHMT	7.156	8.26406	6.04794	0.731835	-0.450409	0.445109	1
1432	BHMT2	418.878	428.497	409.259	0.955103	-0.0662716	0.546399	1
1433	BICC1	53.2327	49.4952	56.9702	1.15102	0.202918	0.409508	1
1434	BICD1	3.67748	3.03385	4.32112	1.4243	0.510257	0.619998	1
1435	BICD2	564.266	541.181	587.351	1.08531	0.118113	0.381986	1
1436	BIK	42.4219	39.6099	45.2339	1.14199	0.191545	0.415034	1
1437	BIN1	1.06501	1.34275	0.787275	0.586315	-0.770252	0.706368	1
1438	BIN2	0.138267	0	0.276533	Inf	Inf	0.994787	1
1439	BIN3	204.186	215.062	193.31	0.898857	-0.153836	0.362878	1
1440	BIRC2	1189.87	1182.18	1197.56	1.013	0.0186385	0.934654	1
1441	BIRC3	200.418	229.826	171.01	0.744083	-0.426465	0.00344257	0.179932
1442	BIRC5	879.616	822.493	936.739	1.1389	0.187644	0.105776	0.866106
1443	BIRC6	527.253	548.784	505.722	0.921533	-0.117892	0.490391	1
1444	BIRC7	4.97353	4.50996	5.4371	1.20558	0.269723	0.874351	1
1445	BIRC8	0	0	0	NA	NA	NA	NA
1446	BLCAP	3.25611	4.97306	1.53917	0.309501	-1.69198	0.104079	0.860291
1447	BLID	0.11884	0	0.237679	Inf	Inf	0.994787	1
1448	BLK	0	0	0	NA	NA	NA	NA
1449	BLM	39.4541	33.0594	45.8487	1.38686	0.471821	0.0580021	0.73096
1450	BLMH	283.426	308.128	258.723	0.839662	-0.252119	0.120742	0.895179
1451	BLNK	0.815974	1.34659	0.285356	0.21191	-2.23848	0.356336	1
1452	BLOC1S1	300.808	282.735	318.881	1.12785	0.173571	0.308263	1
1453	BLOC1S2	344.885	371.208	318.562	0.858178	-0.220651	0.112277	0.884016
1454	BLOC1S3	53.3605	51.702	55.019	1.06416	0.0897111	0.645933	1
1455	BLVRA	824.497	781.364	867.631	1.1104	0.151086	0.24692	1
1456	BLVRB	381.447	388.867	374.027	0.961836	-0.056137	0.722891	1
1457	BLZF1	301.039	297.823	304.256	1.0216	0.0308273	0.988233	1
1458	BMF	75.4432	80.6517	70.2348	0.870842	-0.199517	0.427011	1
1459	BMP1	70.2998	67.2985	73.3011	1.08919	0.12326	0.573559	1
1460	BMP10	0	0	0	NA	NA	NA	NA
1461	BMP15	0	0	0	NA	NA	NA	NA
1462	BMP2	0.757969	0	1.51594	Inf	Inf	0.121114	0.895179
1463	BMP2K	177.448	167.854	187.042	1.11431	0.156157	0.28912	1
1464	BMP3	0.237679	0	0.475359	Inf	Inf	0.705964	1
1465	BMP4	1549.34	1563.76	1534.93	0.981568	-0.02684	0.869779	1
1466	BMP5	0	0	0	NA	NA	NA	NA
1467	BMP6	5.71991	6.75344	4.68639	0.693926	-0.527146	0.355401	1
1468	BMP7	1.11065	1.7282	0.493096	0.285323	-1.80933	0.415608	1
1469	BMP8A	0.451553	0.448864	0.454242	1.01198	0.0171827	1	1
1470	BMP8B	21.4743	22.4437	20.505	0.913619	-0.130335	0.769812	1
1471	BMPER	0.138267	0	0.276533	Inf	Inf	0.994787	1
1472	BMPR1A	353.999	371.732	336.267	0.904596	-0.144655	0.298005	1
1473	BMPR1B	0.749522	0.690652	0.808391	1.17048	0.227094	1	1
1474	BMPR2	747.419	726.988	767.85	1.05621	0.0788929	0.563438	1
1475	BMS1	1034.73	1023.93	1045.54	1.0211	0.0301243	0.828858	1
1476	BMX	0.122815	0.24563	0	0	#NAME?	1	1
1477	BNC1	0	0	0	NA	NA	NA	NA
1478	BNC2	0	0	0	NA	NA	NA	NA
1479	BNIP1	60.439	67.1796	53.6984	0.799326	-0.323145	0.112483	0.884159
1480	BNIP2	419.107	406.345	431.869	1.06281	0.0878883	0.569694	1
1481	BNIP3	3032.32	3040.14	3024.5	0.994857	-0.00743865	0.765095	1
1482	BNIP3L	1320.98	1269.35	1372.61	1.08135	0.112835	0.407874	1
1483	BNIPL	1.88636	1.93928	1.83344	0.945422	-0.0809703	1	1
1484	BOC	0	0	0	NA	NA	NA	NA
1485	BOD1	526.041	502.554	549.527	1.09347	0.128912	0.396991	1
1486	BOD1L1	186.264	186.754	185.773	0.994746	-0.00759935	0.895908	1
1487	BOK	165.986	157.028	174.944	1.11409	0.155871	0.325257	1
1488	BOLA1	7.64629	7.40984	7.88273	1.06382	0.0892531	0.943741	1
1489	BOLA2B	2049.02	1974.33	2123.7	1.07566	0.105216	0.407976	1
1490	BOLA3	1011.37	1045.26	977.487	0.93516	-0.096715	0.490784	1
1491	BOLL	0	0	0	NA	NA	NA	NA
1492	BOP1	505.474	503.903	507.045	1.00624	0.00896895	0.901414	1
1493	BORA	57.559	55.5606	59.5574	1.07194	0.100218	0.727671	1
1494	BPGM	40.3429	36.4057	44.28	1.21629	0.282489	0.364133	1
1495	BPHL	370.306	383.8	356.812	0.929681	-0.105192	0.440894	1
1496	BPI	0	0	0	NA	NA	NA	NA
1497	BPIFA2	0	0	0	NA	NA	NA	NA
1498	BPIFA3	0	0	0	NA	NA	NA	NA
1499	BPIFA4P	0	0	0	NA	NA	NA	NA
1500	BPIFB1	24.921	29.8667	19.9753	0.668816	-0.580319	0.0741674	0.79595
1501	BPIFB2	5833.4	5786.26	5880.54	1.01629	0.0233171	0.76375	1
1502	BPIFB3	0.227121	0	0.454242	Inf	Inf	0.711455	1
1503	BPIFB4	0	0	0	NA	NA	NA	NA
1504	BPIFB6	6.41145	9.39914	3.42375	0.364262	-1.45695	0.0390639	0.636894
1505	BPIFC	0.127934	0.255868	0	0	#NAME?	1	1
1506	BPNT1	120.741	125.485	115.997	0.924389	-0.113429	0.671002	1
1507	BPTF	932.161	908.458	955.864	1.05218	0.0733851	0.554079	1
1508	BRAF	389.922	393.157	386.686	0.983543	-0.0239406	0.873111	1
1509	BRAP	323.983	361.752	286.215	0.791191	-0.337902	0.0333239	0.601198
1510	BRAT1	362.459	362.047	362.872	1.00228	0.00328498	0.995399	1
1511	BRCA1	142.86	118.277	167.444	1.41569	0.501501	0.00593368	0.245334
1512	BRCA2	101.455	89.1563	113.755	1.2759	0.351518	0.0573833	0.727143
1513	BRCC3	53.5605	47.7523	59.3687	1.24326	0.314131	0.161291	0.971261
1514	BRD1	408.725	400.233	417.218	1.04244	0.059963	0.71139	1
1515	BRD2	1968.27	2184.26	1752.28	0.802231	-0.317911	0.00829867	0.300916
1516	BRD3	578.532	535.387	621.677	1.16117	0.215583	0.126785	0.90854
1517	BRD4	2789.58	2829.88	2749.28	0.971516	-0.0416898	0.74365	1
1518	BRD7	622.437	623.792	621.081	0.995653	-0.00628553	0.941871	1
1519	BRD8	1.92273	3.35236	0.493096	0.147089	-2.76524	0.0841759	0.821894
1520	BRD9	186.65	187.553	185.748	0.990377	-0.0139502	0.996469	1
1521	BRDT	0.142093	0.284185	0	0	#NAME?	1	1
1522	BRE	16.8213	16.0021	17.6405	1.10239	0.140632	0.917232	1
1523	BREA2	0.368446	0.736891	0	0	#NAME?	0.502857	1
1524	BRF1	111.265	123.211	99.32	0.806099	-0.310972	0.149574	0.951484
1525	BRF2	136.777	145.523	128.031	0.8798	-0.184752	0.315939	1
1526	BRI3	1213.35	1146.19	1280.51	1.1172	0.159882	0.215473	1
1527	BRI3BP	332.735	296.963	368.508	1.24092	0.311415	0.0390206	0.636894
1528	BRIP1	90.3933	83.3486	97.4381	1.16904	0.225327	0.224679	1
1529	BRIX1	646.843	654.315	639.371	0.977161	-0.0333319	0.761925	1
1530	BRK1	1420.48	1380.04	1460.92	1.0586	0.0821623	0.589424	1
1531	BRMS1	780.931	723.596	838.265	1.15847	0.212221	0.146771	0.944346
1532	BRMS1L	438.823	465.556	412.091	0.885158	-0.175994	0.188733	0.999868
1533	BROX	176.63	185.106	168.154	0.908424	-0.138562	0.374907	1
1534	MPC2	641.491	670.327	612.654	0.913963	-0.129792	0.328565	1
1535	MPC1	1876.54	1747.2	2005.87	1.14805	0.199182	0.120346	0.895179
1536	BRPF1	55.6796	62.1661	49.1931	0.791317	-0.337672	0.172649	0.984393
1537	BRPF3	663.385	705.153	621.617	0.881536	-0.181909	0.224101	1
1538	BRS3	0.280359	0.284185	0.276533	0.973074	-0.0393789	1	1
1539	BRSK1	10.2466	10.2553	10.238	0.998316	-0.00243105	0.934474	1
1540	BRSK2	32.7371	35.0028	30.4714	0.87054	-0.200017	0.627894	1
1541	BRWD1	485.674	475.62	495.727	1.04228	0.0597373	0.617815	1
1542	BRWD3	89.3502	99.6953	79.005	0.792464	-0.335582	0.10635	0.868579
1543	BSCL2	120.868	121.991	119.745	0.981588	-0.026811	0.922549	1
1544	BSDC1	907.308	937.496	877.121	0.9356	-0.0960368	0.467229	1
1545	BSG	7176.84	7201.57	7152.1	0.99313	-0.00994482	0.955318	1
1546	BSN	5.17026	5.96699	4.37353	0.732955	-0.448204	0.687215	1
1547	BSND	0.142093	0.284185	0	0	#NAME?	1	1
1548	BSPH1	0	0	0	NA	NA	NA	NA
1549	BSPRY	2.41221	3.67826	1.14616	0.311605	-1.68221	0.179305	0.992093
1550	BST1	0.93071	1.64486	0.216563	0.13166	-2.92511	0.269488	1
1551	BST2	1149.31	1195.13	1103.48	0.923311	-0.115111	0.517019	1
1552	BSX	0	0	0	NA	NA	NA	NA
1553	BTAF1	348.201	362.255	334.147	0.922408	-0.116523	0.563611	1
1554	BTBD1	1226.89	1252.51	1201.26	0.959082	-0.0602738	0.56957	1
1555	BTBD10	223.094	234.16	212.028	0.905484	-0.143239	0.38677	1
1556	BTBD11	25.358	28.0575	22.6585	0.807572	-0.308338	0.349971	1
1557	BTBD16	119.807	116.799	122.814	1.0515	0.0724473	0.768357	1
1558	BTBD17	0	0	0	NA	NA	NA	NA
1559	BTBD18	0.229551	0.459102	0	0	#NAME?	0.726295	1
1560	BTBD19	135.629	139.976	131.282	0.937891	-0.0925079	0.66443	1
1561	BTBD2	1004.59	991.171	1018.01	1.02708	0.0385428	0.830561	1
1562	BTBD3	756.621	756.179	757.063	1.00117	0.00168597	0.993439	1
1563	BTBD6	6.32851	4.81953	7.8375	1.6262	0.701501	0.192958	1
1564	BTBD7	634.472	649.239	619.705	0.954508	-0.0671702	0.743489	1
1565	BTBD8	14.2089	14.1266	14.2911	1.01164	0.0166961	1	1
1566	BTBD9	107.527	111.239	103.816	0.933264	-0.0996422	0.674288	1
1567	BTC	0	0	0	NA	NA	NA	NA
1568	BTD	375.042	348.128	401.956	1.15462	0.207417	0.142792	0.939592
1569	BTF3	1496.38	1603.61	1389.14	0.86626	-0.207129	0.0994986	0.849696
1570	BTF3L4	235.832	250.925	220.74	0.879705	-0.184908	0.208138	1
1571	BTF3P11	1.02261	1.13674	0.908484	0.7992	-0.323371	1	1
1572	BTG1	574.266	635.747	512.786	0.806588	-0.310096	0.025517	0.530667
1573	BTG2	416.124	472.922	359.326	0.759799	-0.39631	0.00715906	0.274598
1574	BTG3	86.9506	93.2438	80.6573	0.865015	-0.209202	0.392227	1
1575	BTG4	0	0	0	NA	NA	NA	NA
1576	BTK	0.122815	0.24563	0	0	#NAME?	1	1
1577	BTLA	0	0	0	NA	NA	NA	NA
1578	BTN1A1	1.23953	1.90835	0.570712	0.299061	-1.74149	0.39858	1
1579	BTN2A1	375.041	407.714	342.367	0.839722	-0.252016	0.0799889	0.812366
1580	BTN2A2	105.84	124.768	86.9125	0.696595	-0.521607	0.0089984	0.316184
1581	BTN3A1	38.0701	38.8254	37.3149	0.961095	-0.0572488	0.830134	1
1582	BTN3A2	461.179	444.797	477.561	1.07366	0.102536	0.493303	1
1583	BTN3A3	29.6049	34.1247	25.0851	0.735101	-0.443985	0.161056	0.971261
1584	BTNL2	0	0	0	NA	NA	NA	NA
1585	BTNL3	0	0	0	NA	NA	NA	NA
1586	BTNL8	1.14413	0.865569	1.4227	1.64366	0.716908	0.827371	1
1587	BTNL9	0	0	0	NA	NA	NA	NA
1588	BTRC	315.363	310	320.727	1.03461	0.0490804	0.871386	1
1589	BUB1	578.283	545.441	611.126	1.12043	0.164046	0.191292	1
1590	BUB1B	291.037	269.093	312.981	1.1631	0.21797	0.119039	0.89405
1591	BUB3	2672.29	2578.69	2765.89	1.0726	0.101107	0.405945	1
1592	BUD13	191.553	177.176	205.93	1.16229	0.216973	0.205421	1
1593	BUD31	448.213	470.904	425.522	0.903628	-0.146199	0.292392	1
1594	BVES	40.6546	37.8528	43.4564	1.14803	0.199166	0.455353	1
1595	BYSL	375.251	383.228	367.274	0.958371	-0.0613442	0.666685	1
1596	BZRAP1	0.388641	0.284185	0.493096	1.73512	0.795036	0.988687	1
1597	BZW1	4237.31	4149.5	4325.11	1.04232	0.0597985	0.716621	1
1598	BZW2	774.326	775.407	773.244	0.997211	-0.00402999	0.871914	1
1599	C10orf10	782.364	665.398	899.329	1.35157	0.434632	0.00107097	0.0868494
1600	DNAJC9-AS1	0	0	0	NA	NA	NA	NA
1601	C10orf105	0	0	0	NA	NA	NA	NA
1602	C10orf107	0	0	0	NA	NA	NA	NA
1603	C10orf108	67.3891	65.7677	69.0104	1.0493	0.0694339	0.750017	1
1604	C10orf11	142.926	152.039	133.813	0.880121	-0.184227	0.402847	1
1605	C10orf111	4.08652	4.89579	3.27725	0.669401	-0.579057	0.545814	1
1606	C10orf113	0	0	0	NA	NA	NA	NA
1607	C10orf116	1.95337	1.80569	2.10106	1.16357	0.218562	1	1
1608	C10orf118	424.733	438.665	410.802	0.936484	-0.094674	0.440216	1
1609	C10orf12	317.785	291.096	344.474	1.18337	0.2429	0.0957636	0.841932
1610	C10orf120	0	0	0	NA	NA	NA	NA
1611	TEX36	0	0	0	NA	NA	NA	NA
1612	FUOM	34.839	36.3892	33.2888	0.914799	-0.128473	0.741415	1
1613	C10orf128	0	0	0	NA	NA	NA	NA
1614	C10orf129	0	0	0	NA	NA	NA	NA
1615	C10orf131	1.06392	0.203234	1.92462	9.46997	3.24336	0.183078	0.993052
1616	LINC00619	0	0	0	NA	NA	NA	NA
1617	C10orf137	162.605	157.831	167.378	1.06049	0.0847281	0.71137	1
1618	SKIDA1	2.98201	3.20108	2.76295	0.86313	-0.21235	0.840704	1
1619	C10orf2	401.116	429.928	372.304	0.865966	-0.207617	0.177211	0.990184
1620	C10orf25	0.507856	0.501498	0.514213	1.02535	0.0361203	1	1
1621	WBP1L	431.322	433.971	428.673	0.987792	-0.0177207	0.855938	1
1622	TBATA	0	0	0	NA	NA	NA	NA
1623	R3HCC1L	143.842	136.696	150.988	1.10455	0.143459	0.476245	1
1624	C10orf32	353.834	369.565	338.103	0.914869	-0.128363	0.427054	1
1625	C10orf35	22.4277	21.6745	23.1809	1.0695	0.096934	0.942569	1
1626	CACUL1	369.358	366.915	371.8	1.01331	0.0190803	0.931201	1
1627	C10orf47	304.671	309.612	299.729	0.968079	-0.0468035	0.642277	1
1628	C10orf53	0	0	0	NA	NA	NA	NA
1629	C10orf54	9.08058	7.52866	10.6325	1.41227	0.498015	0.42906	1
1630	C10orf55	19.8862	28.9369	10.8356	0.374456	-1.41713	0.000321216	0.0353996
1631	C10orf62	18.4888	18.0088	18.9688	1.05331	0.0749264	0.876165	1
1632	C10orf67	0.385802	0.771604	0	0	#NAME?	0.495223	1
1633	C10orf68	0	0	0	NA	NA	NA	NA
1634	C10orf71	0	0	0	NA	NA	NA	NA
1635	C10orf76	193.979	209.943	178.015	0.847917	-0.238004	0.132282	0.922671
1636	PLEKHS1	0.108281	0	0.216563	Inf	Inf	0.994786	1
1637	C10orf82	0.7563	0.406467	1.10613	2.72134	1.44431	0.789361	1
1638	C10orf88	156.814	163.354	150.273	0.919923	-0.120415	0.582421	1
1639	C10orf90	0	0	0	NA	NA	NA	NA
1640	C10orf91	0.492404	0.747129	0.237679	0.318124	-1.65234	0.785435	1
1641	C10orf95	3.50569	4.35936	2.65201	0.608348	-0.71703	0.584041	1
1642	CCDC172	0.345961	0	0.691921	Inf	Inf	0.496149	1
1643	C10orf99	2.99508	4.22562	1.76455	0.417584	-1.25986	0.256912	1
1644	C11orf1	45.0378	43.2144	46.8612	1.08439	0.116882	0.653903	1
1645	C11orf10	971.895	915.05	1028.74	1.12424	0.168956	0.193005	1
1646	C11orf16	0	0	0	NA	NA	NA	NA
1647	VPS51	802.098	827.455	776.74	0.938711	-0.0912477	0.617567	1
1648	C11orf20	5.55628	4.20808	6.90448	1.64077	0.714371	0.374028	1
1649	C11orf21	0.326049	0.652098	0	0	#NAME?	0.52372	1
1650	C11orf24	1451.55	1430.92	1472.17	1.02883	0.041001	0.748323	1
1651	C11orf30	534.566	533.55	535.582	1.00381	0.00548264	1	1
1652	C11orf31	353.287	302.034	404.54	1.33938	0.421569	0.00522724	0.229252
1653	C11orf34	0.284185	0.568371	0	0	#NAME?	0.70022	1
1654	C11orf35	41.7851	42.8293	40.7409	0.951239	-0.0721206	0.87149	1
1655	C11orf40	0	0	0	NA	NA	NA	NA
1656	KIAA1549L	0.403025	0.568371	0.237679	0.418177	-1.25781	1	1
1657	C11orf42	0.122815	0.24563	0	0	#NAME?	1	1
1658	C11orf45	0	0	0	NA	NA	NA	NA
1659	ARL14EP	98.0808	103.584	92.5772	0.893738	-0.162076	0.386608	1
1660	C11orf48	56.9743	58.4852	55.4633	0.948331	-0.0765376	0.911789	1
1661	C11orf49	309.456	325.568	293.343	0.901021	-0.150367	0.289519	1
1662	ANAPC15	267.617	238.299	296.934	1.24606	0.317368	0.0588553	0.733971
1663	C11orf52	66.0174	62.4602	69.5745	1.1139	0.155621	0.507621	1
1664	C11orf53	0	0	0	NA	NA	NA	NA
1665	C11orf54	482.838	454.865	510.812	1.123	0.167352	0.29711	1
1666	C11orf57	218.643	216.258	221.029	1.02206	0.0314861	0.882524	1
1667	C11orf58	3137.62	3022.47	3252.77	1.0762	0.105942	0.443996	1
1668	MSANTD2	82.2464	77.9529	86.5398	1.11015	0.15076	0.499891	1
1669	C11orf63	0.122815	0.24563	0	0	#NAME?	1	1
1670	C11orf65	0.517386	0.511736	0.523035	1.02208	0.031509	1	1
1671	AAMDC	151.107	141.373	160.84	1.1377	0.186118	0.39449	1
1672	C11orf70	0	0	0	NA	NA	NA	NA
1673	C11orf73	452.31	427.998	476.621	1.1136	0.155237	0.299646	1
1674	C11orf74	59.8632	60.2553	59.471	0.986984	-0.0189014	0.925491	1
1675	C11orf75	219.094	224.43	213.758	0.952445	-0.070292	0.60738	1
1676	C11orf80	156.819	162.397	151.24	0.931301	-0.102681	0.489267	1
1677	C11orf82	94.6946	88.847	100.542	1.13163	0.178404	0.306329	1
1678	C11orf83	208.422	208.958	207.885	0.994869	-0.00742147	0.946257	1
1679	C11orf84	592.792	555.816	629.769	1.13305	0.180217	0.182053	0.993052
1680	C11orf85	0	0	0	NA	NA	NA	NA
1681	C11orf86	3.51695	4.62094	2.41297	0.522182	-0.937375	0.25931	1
1682	C11orf87	0	0	0	NA	NA	NA	NA
1683	C11orf88	0	0	0	NA	NA	NA	NA
1684	C11orf9	553.943	565.387	542.5	0.959519	-0.0596168	0.718695	1
1685	C11orf91	0.993598	1.71066	0.276533	0.161653	-2.62903	0.210329	1
1686	C11orf92	38.7999	35.6334	41.9664	1.17773	0.236004	0.390955	1
1687	C11orf93	338.489	326.723	350.255	1.07202	0.100338	0.514515	1
1688	C11orf94	3.88224	3.69996	4.06453	1.09853	0.135577	0.959605	1
1689	C11orf95	11.7554	10.5254	12.9854	1.23372	0.303017	0.514563	1
1690	C11orf96	0.220457	0.203234	0.237679	1.16949	0.225879	1	1
1691	C12orf10	156.087	153.668	158.507	1.03149	0.0447258	0.873886	1
1692	CCER1	0.834599	0	1.6692	Inf	Inf	0.110651	0.879073
1693	C12orf23	534.669	539.104	530.234	0.983547	-0.0239337	0.789726	1
1694	FAM216A	88.3352	92.4037	84.2668	0.911943	-0.132985	0.587984	1
1695	METTL25	18.3115	15.0041	21.6188	1.44086	0.526925	0.231395	1
1696	C12orf29	340.458	343.326	337.591	0.983295	-0.0243042	0.796201	1
1697	LINC00612	0.837908	0.487419	1.1884	2.43814	1.28578	0.631823	1
1698	FAM222A	142.977	121.442	164.511	1.35465	0.437919	0.0119702	0.372404
1699	KIAA1551	238.159	248.096	228.222	0.919892	-0.120463	0.475643	1
1700	C12orf36	0.464751	0.406467	0.523035	1.28678	0.36377	1	1
1701	LINC00615	0	0	0	NA	NA	NA	NA
1702	C12orf39	2.84306	3.09197	2.59415	0.838997	-0.253262	0.739288	1
1703	C12orf4	27.9792	29.8411	26.1173	0.875214	-0.192292	0.519661	1
1704	C12orf40	0.11884	0	0.237679	Inf	Inf	0.994787	1
1705	C12orf42	0.261518	0	0.523035	Inf	Inf	0.694539	1
1706	C12orf43	217.767	220.886	214.647	0.971756	-0.0413335	0.806562	1
1707	C12orf44	473.583	468.416	478.75	1.02206	0.0314817	0.902053	1
1708	C12orf45	117.905	119.147	116.663	0.979154	-0.0303916	0.794192	1
1709	MAPKAPK5-AS1	50.292	49.0789	51.5051	1.04943	0.0696119	0.892199	1
1710	C12orf49	459.61	455.437	463.783	1.01833	0.0261989	0.992467	1
1711	C12orf5	161.202	175.016	147.389	0.84215	-0.247851	0.132505	0.92306
1712	C12orf50	0	0	0	NA	NA	NA	NA
1713	HECTD4	116.652	121.205	112.1	0.924878	-0.112665	0.619902	1
1714	C12orf52	235.639	240.327	230.95	0.960983	-0.0574179	0.7427	1
1715	C12orf54	0.108281	0	0.216563	Inf	Inf	0.994786	1
1716	C12orf56	0	0	0	NA	NA	NA	NA
1717	C12orf57	1099.68	1079.92	1119.44	1.0366	0.0518638	0.727111	1
1718	TMEM52B	0.408171	0.24563	0.570712	2.32346	1.21627	0.988801	1
1719	C12orf60	5.82032	7.86148	3.77917	0.48072	-1.05673	0.135821	0.929553
1720	C12orf61	1.81697	1.44162	2.19233	1.52073	0.604768	0.723186	1
1721	COX14	33.3752	39.8551	26.8954	0.67483	-0.567405	0.0469267	0.679544
1722	C12orf65	171.731	168.461	175.002	1.03883	0.0549587	0.652914	1
1723	C12orf66	56.8775	52.6513	61.1037	1.16054	0.214792	0.356229	1
1724	C12orf68	0.356519	0	0.713038	Inf	Inf	0.491232	1
1725	C12orf69	2.42358	3.61992	1.22725	0.339027	-1.56053	0.249964	1
1726	C12orf70	0.458217	0.24563	0.670805	2.73095	1.4494	0.765312	1
1727	C12orf71	0	0	0	NA	NA	NA	NA
1728	C12orf73	194.698	180.096	209.3	1.16216	0.216803	0.204278	1
1729	C12orf74	0.368446	0.736891	0	0	#NAME?	0.502857	1
1730	C12orf75	249.56	256.62	242.5	0.944975	-0.0816516	0.481114	1
1731	C12orf76	0	0	0	NA	NA	NA	NA
1732	C12orf77	0	0	0	NA	NA	NA	NA
1733	RGCC	80.0327	93.6859	66.3795	0.708532	-0.497095	0.0303351	0.565642
1734	TEX29	1.34643	1.1536	1.53926	1.33431	0.416097	0.97607	1
1735	TEX26	0	0	0	NA	NA	NA	NA
1736	TEX30	5.18818	7.69441	2.68195	0.348558	-1.52053	0.0567817	0.726388
1737	FAM216B	0	0	0	NA	NA	NA	NA
1738	MEDAG	0	0	0	NA	NA	NA	NA
1739	C13orf35	0	0	0	NA	NA	NA	NA
1740	C14orf1	4243.35	3956.79	4529.92	1.14485	0.195157	0.102011	0.856136
1741	C14orf101	83.8443	87.5594	80.1291	0.91514	-0.127935	0.607608	1
1742	NRDE2	185.473	195.853	175.093	0.894003	-0.161649	0.401718	1
1743	C14orf105	4.26312	3.31274	5.2135	1.57377	0.654227	0.621913	1
1744	TMEM251	65.889	53.9529	77.8251	1.44246	0.528534	0.0203662	0.472518
1745	GPATCH2L	138.542	130.302	146.782	1.12647	0.171812	0.376	1
1746	C14orf119	1174.13	1164.71	1183.56	1.01619	0.0231665	0.900367	1
1747	DTD2	290.187	317.564	262.809	0.827577	-0.273034	0.0723197	0.79142
1748	GSKIP	231.419	237.159	225.68	0.951597	-0.0715771	0.679477	1
1749	VIPAS39	171.089	162.326	179.851	1.10797	0.147914	0.554916	1
1750	PCNXL4	416.862	435.881	397.843	0.912734	-0.131733	0.345566	1
1751	C14orf142	286.645	288.215	285.076	0.989108	-0.0157995	0.871262	1
1752	L3HYPDH	137.359	145.541	129.176	0.88756	-0.172083	0.248696	1
1753	C14orf159	24.9586	23.5006	26.4165	1.12407	0.168736	0.619841	1
1754	C14orf162	0	0	0	NA	NA	NA	NA
1755	C14orf166	1354.78	1291.67	1417.9	1.09773	0.134522	0.339255	1
1756	C14orf166B	0	0	0	NA	NA	NA	NA
1757	C14orf169	107.598	100.441	114.754	1.1425	0.192197	0.287203	1
1758	TMEM253	0.768135	1.01323	0.523035	0.516204	-0.953987	0.821256	1
1759	C14orf177	0	0	0	NA	NA	NA	NA
1760	C14orf178	18.0856	16.6678	19.5034	1.17013	0.226667	0.611289	1
1761	C14orf180	0.142093	0.284185	0	0	#NAME?	1	1
1762	C14orf182	0.354829	0	0.709658	Inf	Inf	0.492006	1
1763	C14orf183	0	0	0	NA	NA	NA	NA
1764	C14orf2	2205.48	2171.89	2239.07	1.03093	0.0439505	0.733248	1
1765	NOP9	425.037	431.974	418.099	0.967881	-0.0470991	0.834543	1
1766	C14orf23	0	0	0	NA	NA	NA	NA
1767	C14orf28	87.4727	81.6113	93.3341	1.14364	0.193635	0.383644	1
1768	C14orf37	2.64602	2.45486	2.83718	1.15574	0.208819	0.966864	1
1769	CCDC175	0	0	0	NA	NA	NA	NA
1770	C14orf39	1.07147	1.64101	0.501919	0.305859	-1.70906	0.421351	1
1771	ELMSAN1	164.308	163.303	165.313	1.01231	0.0176549	0.930083	1
1772	CCDC176	21.2427	21.4491	21.0363	0.980754	-0.0280365	1	1
1773	SYNE3	71.207	68.1983	74.2156	1.08823	0.121988	0.62166	1
1774	C14orf79	0.101617	0.203234	0	0	#NAME?	1	1
1775	C14orf80	76.5295	65.7084	87.3507	1.32937	0.410742	0.055272	0.717075
1776	C14orf93	102.116	100.93	103.303	1.02351	0.0335242	0.794661	1
1777	FAM219B	100.095	93.3273	106.862	1.14503	0.195382	0.338379	1
1778	C15orf23	326.345	287.943	364.748	1.26673	0.341113	0.0168832	0.432573
1779	EMC7	1091.46	1081.53	1101.38	1.01835	0.0262377	0.830222	1
1780	C15orf26	1.50754	1.97783	1.03725	0.524436	-0.931161	0.609349	1
1781	C15orf27	0.231096	0.24563	0.216563	0.88166	-0.181706	1	1
1782	KATNBL1	108.272	115.148	101.395	0.880555	-0.183515	0.439213	1
1783	C15orf32	0.11884	0	0.237679	Inf	Inf	0.994787	1
1784	FAM227B	16.9423	20.9092	12.9754	0.620556	-0.688366	0.116666	0.891662
1785	HEXA-AS1	0.440995	0.448864	0.433125	0.964936	-0.0514949	1	1
1786	C15orf37	16.2579	17.015	15.5007	0.911004	-0.134471	0.828014	1
1787	C15orf39	496.949	476.611	517.287	1.08534	0.118154	0.540361	1
1788	C15orf40	135.08	133.111	137.049	1.02959	0.0420631	0.877141	1
1789	C15orf41	111.495	109.738	113.251	1.03202	0.0454688	0.931853	1
1790	TICRR	147.097	133.599	160.594	1.20205	0.265501	0.0740414	0.79595
1791	C15orf43	0	0	0	NA	NA	NA	NA
1792	VWA9	36.8635	35.6108	38.1162	1.07035	0.0980874	0.731301	1
1793	C15orf48	0.462193	0.491261	0.433125	0.88166	-0.181706	1	1
1794	LINC00593	0	0	0	NA	NA	NA	NA
1795	C15orf52	107.236	112.098	102.375	0.913267	-0.130891	0.565797	1
1796	C15orf53	0	0	0	NA	NA	NA	NA
1797	C15orf54	0	0	0	NA	NA	NA	NA
1798	C15orf55	0	0	0	NA	NA	NA	NA
1799	C15orf57	250.386	264.682	236.09	0.891975	-0.164924	0.312219	1
1800	GDPGP1	59.3623	62.4951	56.2295	0.899743	-0.152415	0.521978	1
1801	C15orf59	0	0	0	NA	NA	NA	NA
1802	C15orf60	0.142678	0	0.285356	Inf	Inf	0.994788	1
1803	C15orf61	107.312	106.912	107.712	1.00748	0.0107497	0.93712	1
1804	C15orf62	29.5427	30.9567	28.1288	0.908649	-0.138204	0.747463	1
1805	HYPK	622.433	601.842	643.024	1.06843	0.0954883	0.524969	1
1806	C16orf11	0.108281	0	0.216563	Inf	Inf	0.994786	1
1807	C16orf13	233.851	207.967	259.735	1.24893	0.32069	0.0457862	0.671062
1808	C16orf3	17.3802	18.7229	16.0375	0.856575	-0.223348	0.646007	1
1809	TSR3	666.82	638.266	695.374	1.08947	0.123631	0.318415	1
1810	C16orf45	26.3397	29.6085	23.071	0.779201	-0.359932	0.24602	1
1811	C16orf46	4.80513	5.93644	3.67382	0.618859	-0.692318	0.340505	1
1812	ENKD1	46.0782	44.9131	47.2433	1.05188	0.0729743	0.829717	1
1813	C16orf5	1674.9	1771.87	1577.92	0.890539	-0.16725	0.147996	0.949381
1814	C16orf52	878.53	905.657	851.404	0.940095	-0.0891208	0.553739	1
1815	PAGR1	553.843	524.128	583.557	1.11339	0.154954	0.218988	1
1816	C16orf54	0	0	0	NA	NA	NA	NA
1817	C16orf55	89.4663	94.6085	84.3241	0.891296	-0.166024	0.49045	1
1818	USB1	807.204	759.146	855.263	1.12661	0.171991	0.229416	1
1819	C16orf58	293.814	297.883	289.744	0.972676	-0.039969	0.897903	1
1820	C16orf59	80.9184	69.9791	91.8577	1.31265	0.392477	0.0494243	0.689863
1821	CMC2	765.801	765.552	766.049	1.00065	0.000937258	0.915693	1
1822	C16orf62	8.30656	9.21831	7.3948	0.802187	-0.31799	0.547618	1
1823	VPS9D1	103.205	103.589	102.822	0.992593	-0.0107257	0.954963	1
1824	C16orf70	1185.15	1256.91	1113.39	0.885814	-0.174924	0.175312	0.988088
1825	C16orf71	0.122815	0.24563	0	0	#NAME?	1	1
1826	C16orf72	574.7	610.596	538.805	0.882425	-0.180455	0.219041	1
1827	MEIOB	0	0	0	NA	NA	NA	NA
1828	C16orf74	0	0	0	NA	NA	NA	NA
1829	C16orf78	0	0	0	NA	NA	NA	NA
1830	BRICD5	44.4507	39.3105	49.591	1.26152	0.335165	0.213703	1
1831	C16orf80	216.756	194.84	238.671	1.22496	0.292734	0.0748086	0.79595
1832	C16orf82	0.948143	1.42093	0.475359	0.334541	-1.57974	0.650983	1
1833	C16orf86	5.92549	5.24669	6.60429	1.25875	0.331995	0.73375	1
1834	C16orf87	299.881	341.363	258.399	0.756962	-0.401706	0.0106136	0.343632
1835	C16orf88	291.2	253.615	328.785	1.2964	0.374507	0.015182	0.414959
1836	C16orf89	11.8117	12.6272	10.9963	0.870843	-0.199516	0.675595	1
1837	C16orf90	0	0	0	NA	NA	NA	NA
1838	C16orf91	0	0	0	NA	NA	NA	NA
1839	C16orf92	0.227121	0	0.454242	Inf	Inf	0.711455	1
1840	C16orf93	6.82929	6.12543	7.53314	1.22981	0.298439	0.692	1
1841	C16orf95	9.03453	8.29333	9.77572	1.17875	0.237252	0.713454	1
1842	C16orf96	0.345326	0.690652	0	0	#NAME?	0.513814	1
1843	C17orf100	231.364	214.296	248.433	1.1593	0.213255	0.19559	1
1844	OGFOD3	480.263	458.199	502.327	1.09631	0.132653	0.323056	1
1845	C17orf102	0	0	0	NA	NA	NA	NA
1846	C17orf103	14.6214	16.9445	12.2983	0.7258	-0.462356	0.337412	1
1847	C17orf104	0.918456	1.34382	0.493096	0.366937	-1.4464	0.654649	1
1848	C17orf105	0.220457	0.203234	0.237679	1.16949	0.225879	1	1
1849	C17orf107	13.4823	11.4626	15.502	1.3524	0.43552	0.43031	1
1850	LYRM9	4.61341	4.3479	4.87892	1.12213	0.166245	0.798484	1
1851	SMIM5	3.21725	4.40214	2.03235	0.461674	-1.11505	0.280564	1
1852	SMIM6	11.2286	14.2037	8.2535	0.581081	-0.783188	0.146736	0.944346
1853	HID1	856.887	1034.77	679.006	0.656192	-0.60781	2.81904e-06	0.000794507
1854	GID4	100.614	95.7862	105.442	1.10081	0.138561	0.521805	1
1855	SPATA32	0.229551	0.459102	0	0	#NAME?	0.726295	1
1856	C17orf47	0.24563	0.491261	0	0	#NAME?	0.717921	1
1857	ADPRM	48.3833	55.5491	41.2174	0.742	-0.430509	0.0689358	0.777696
1858	C17orf49	479.131	475.911	482.352	1.01353	0.0193934	0.882672	1
1859	C17orf50	0	0	0	NA	NA	NA	NA
1860	C17orf51	84.9421	96.4009	73.4834	0.762268	-0.391629	0.0765296	0.800302
1861	C17orf53	71.7828	72.1121	71.4535	0.990866	-0.0132374	0.903496	1
1862	ENTHD2	360.631	357.024	364.238	1.02021	0.0288614	0.795469	1
1863	EFCAB13	0.285356	0	0.570712	Inf	Inf	0.684293	1
1864	C17orf58	134.048	128.08	140.015	1.09319	0.128539	0.509016	1
1865	C17orf59	124.914	128.136	121.691	0.949701	-0.074455	0.754097	1
1866	C17orf61	395.415	411.19	379.641	0.923274	-0.115169	0.47367	1
1867	C17orf62	332.298	283.401	381.195	1.34507	0.427685	0.00466926	0.21579
1868	FAM222B	569.885	579.333	560.437	0.967383	-0.0478411	0.729009	1
1869	C17orf64	0	0	0	NA	NA	NA	NA
1870	C17orf66	0	0	0	NA	NA	NA	NA
1871	C17orf67	10.7487	14.674	6.82348	0.465005	-1.10468	0.0587733	0.733971
1872	CRHR1-IT1	0.973832	0.71497	1.23269	1.72412	0.785861	0.811117	1
1873	C17orf70	270.828	260.862	280.795	1.07641	0.106228	0.512916	1
1874	C17orf72	0.231096	0.24563	0.216563	0.88166	-0.181706	1	1
1875	C17orf74	0.840419	0.988917	0.691921	0.699676	-0.515242	1	1
1876	C17orf75	171.426	163.509	179.344	1.09685	0.133362	0.387264	1
1877	C17orf77	0	0	0	NA	NA	NA	NA
1878	C17orf78	0.122815	0.24563	0	0	#NAME?	1	1
1879	C17orf79	347.354	318.557	376.152	1.1808	0.239764	0.124879	0.904054
1880	C17orf80	258.541	252.752	264.33	1.04581	0.0646183	0.678889	1
1881	ELP5	451.429	425.989	476.869	1.11944	0.162777	0.385569	1
1882	C17orf82	21.3672	20.8466	21.8877	1.04994	0.0703095	0.943896	1
1883	C17orf85	410.37	434.657	386.083	0.888248	-0.170965	0.30109	1
1884	C17orf89	202.708	176.175	229.242	1.30122	0.379867	0.0228134	0.504124
1885	OXLD1	99.6679	95.8062	103.53	1.08061	0.111851	0.519045	1
1886	C17orf96	814.048	845.585	782.512	0.925409	-0.111837	0.433982	1
1887	C17orf97	11.9486	14.0109	9.88628	0.705616	-0.503045	0.298495	1
1888	C17orf98	0.276533	0	0.553067	Inf	Inf	0.687959	1
1889	C17orf99	1.6367	1.51767	1.75573	1.15686	0.210216	1	1
1890	LDLRAD4	48.1105	56.7463	39.4747	0.695635	-0.523598	0.059138	0.733971
1891	C18orf21	149.981	152.911	147.05	0.961669	-0.0563884	0.744765	1
1892	C18orf25	33.0667	30.6197	35.5136	1.15983	0.213911	0.4769	1
1893	DYNAP	0	0	0	NA	NA	NA	NA
1894	C18orf32	117.405	119.776	115.033	0.960399	-0.058294	0.81982	1
1895	CCDC178	0.392842	0.785684	0	0	#NAME?	0.49226	1
1896	C18orf42	0	0	0	NA	NA	NA	NA
1897	C18orf54	7.02916	4.63608	9.42224	2.03237	1.02316	0.149846	0.951484
1898	C18orf56	273.925	266.322	281.528	1.0571	0.0801057	0.596286	1
1899	C18orf62	0	0	0	NA	NA	NA	NA
1900	C18orf63	0.101617	0.203234	0	0	#NAME?	1	1
1901	C18orf8	122.466	115.048	129.885	1.12896	0.175	0.373671	1
1902	C19orf10	1441.89	1369.04	1514.74	1.10643	0.145912	0.251231	1
1903	C19orf12	7.9535	7.79348	8.11352	1.04107	0.0580604	0.995817	1
1904	C19orf18	6.06187	7.07302	5.05072	0.714082	-0.485838	0.51447	1
1905	C19orf21	152.625	160.659	144.59	0.899984	-0.152029	0.401772	1
1906	C19orf24	685.565	650.589	720.541	1.10752	0.147335	0.297844	1
1907	C19orf25	239.125	227.767	250.484	1.09974	0.137158	0.382973	1
1908	C19orf26	47.1246	42.5087	51.7406	1.21718	0.283538	0.320106	1
1909	CACTIN	250.707	258.7	242.714	0.938207	-0.0920226	0.476685	1
1910	C19orf33	3.38051	4.03684	2.72418	0.67483	-0.567403	0.588897	1
1911	C19orf35	0	0	0	NA	NA	NA	NA
1912	C19orf38	5.81417	8.627	3.00133	0.347899	-1.52326	0.0259116	0.53159
1913	C19orf40	45.6119	39.1746	52.0492	1.32865	0.409958	0.148672	0.949894
1914	SMIM7	441.672	436.938	446.406	1.02167	0.030928	0.861493	1
1915	C19orf43	4596.83	4367.53	4826.12	1.105	0.144048	0.265333	1
1916	C19orf44	68.282	60.7603	75.8038	1.24759	0.31914	0.15349	0.955051
1917	C19orf45	0	0	0	NA	NA	NA	NA
1918	SYNE4	38.2675	34.178	42.3569	1.2393	0.309529	0.261193	1
1919	C19orf48	5.41465	4.38245	6.44685	1.47106	0.556857	0.471263	1
1920	DNAAF3	18.6302	17.332	19.9284	1.1498	0.201387	0.648856	1
1921	C19orf53	770.171	720.007	820.334	1.13934	0.188199	0.183308	0.993831
1922	C19orf54	206.145	208.854	203.436	0.974058	-0.0379202	0.894917	1
1923	C19orf55	89.4266	93.3362	85.5171	0.916226	-0.126224	0.609122	1
1924	C19orf57	5.975	5.81309	6.13691	1.05571	0.0782074	1	1
1925	C19orf59	1.23026	0.852556	1.60796	1.88605	0.915365	0.65351	1
1926	C19orf6	1383.96	1332.53	1435.39	1.07719	0.107274	0.405194	1
1927	C19orf60	31.2988	29.8758	32.7218	1.09526	0.131275	0.696761	1
1928	EMC10	0.108281	0	0.216563	Inf	Inf	0.994786	1
1929	C19orf66	293.82	279.8	307.84	1.10021	0.137784	0.422968	1
1930	C19orf69	12.0316	16.2882	7.7749	0.477332	-1.06694	0.0235785	0.511174
1931	C19orf70	30.1949	27.6994	32.6903	1.18018	0.239006	0.467193	1
1932	C19orf71	2.67842	3.20454	2.1523	0.671639	-0.574241	0.609191	1
1933	C19orf73	23.9304	22.0872	25.7736	1.1669	0.222683	0.391755	1
1934	SIGLECL1	0	0	0	NA	NA	NA	NA
1935	ADM5	26.2303	26.2906	26.17	0.995416	-0.00662902	0.975339	1
1936	C19orf77	373.347	413.214	333.48	0.80704	-0.309288	0.0317952	0.583376
1937	PET100	137.207	124.848	149.565	1.19797	0.260596	0.169781	0.983046
1938	C19orf80	167.735	171.307	164.164	0.958302	-0.0614476	0.645267	1
1939	C19orf81	0	0	0	NA	NA	NA	NA
1940	C1D	288.454	288.324	288.584	1.0009	0.00129811	0.9259	1
1941	C1GALT1	1759.53	1574.38	1944.67	1.2352	0.304743	0.0172935	0.43608
1942	C1GALT1C1	546.605	532.774	560.437	1.05192	0.0730291	0.629715	1
1943	C1orf100	0	0	0	NA	NA	NA	NA
1944	C1orf101	1.18299	1.51873	0.847245	0.557863	-0.842017	0.695301	1
1945	C1orf105	0	0	0	NA	NA	NA	NA
1946	C1orf106	321.785	344.008	299.562	0.8708	-0.199586	0.202232	1
1947	C1orf109	258.522	253.404	263.641	1.0404	0.0571336	0.704404	1
1948	C1orf110	0	0	0	NA	NA	NA	NA
1949	C1orf111	0	0	0	NA	NA	NA	NA
1950	C1orf112	73.6754	69.0123	78.3385	1.13514	0.182868	0.443507	1
1951	C1orf114	0.101617	0.203234	0	0	#NAME?	1	1
1952	C1orf115	378.47	372.526	384.413	1.03191	0.0453169	0.87516	1
1953	C1orf116	52.0707	53.7624	50.3791	0.93707	-0.0937715	0.630918	1
1954	C1orf122	215.23	214.26	216.199	1.00905	0.012996	0.981853	1
1955	C1orf123	547.784	518.991	576.577	1.11096	0.151805	0.253743	1
1956	SPRTN	244.403	248.262	240.543	0.968906	-0.045571	0.694443	1
1957	C1orf126	45.0791	53.3012	36.857	0.691486	-0.532229	0.0658642	0.766128
1958	C1orf127	0.224432	0.448864	0	0	#NAME?	0.729102	1
1959	C1orf129	0	0	0	NA	NA	NA	NA
1960	NCMAP	19.5234	21.5666	17.4803	0.810526	-0.30307	0.499009	1
1961	C1orf131	180.982	175.329	186.634	1.06448	0.0901508	0.624482	1
1962	SERTAD4-AS1	0	0	0	NA	NA	NA	NA
1963	AUNIP	91.205	88.2217	94.1883	1.06763	0.0944151	0.542801	1
1964	C1orf140	0	0	0	NA	NA	NA	NA
1965	C1orf141	0	0	0	NA	NA	NA	NA
1966	SZRD1	2692.09	2738.56	2645.63	0.966066	-0.0498061	0.70102	1
1967	C1orf146	0	0	0	NA	NA	NA	NA
1968	GCSAML	0	0	0	NA	NA	NA	NA
1969	C1orf158	0	0	0	NA	NA	NA	NA
1970	C1orf159	151.547	147.983	155.111	1.04817	0.0678719	0.615253	1
1971	C1orf162	0.492083	0.767604	0.216563	0.282128	-1.82558	0.785491	1
1972	C1orf168	7.84944	8.71472	6.98416	0.80142	-0.319369	0.74395	1
1973	C1orf170	0.918517	0.743287	1.09375	1.4715	0.557289	0.981619	1
1974	C1orf172	22.3592	22.265	22.4535	1.00847	0.0121621	0.975575	1
1975	C1orf173	0.127934	0.255868	0	0	#NAME?	1	1
1976	C1orf174	336.691	340.431	332.951	0.978028	-0.0320519	0.931807	1
1977	C1orf177	0.231096	0.24563	0.216563	0.88166	-0.181706	1	1
1978	TSACC	6.30168	5.59007	7.0133	1.2546	0.327228	0.555694	1
1979	C1orf185	0.138267	0	0.276533	Inf	Inf	0.994787	1
1980	C1orf186	6.05094	5.27634	6.82554	1.29361	0.371406	0.614764	1
1981	DRAXIN	0.500965	0.448864	0.553067	1.23215	0.301175	1	1
1982	C1orf189	1.86991	2.89258	0.847245	0.292903	-1.7715	0.156033	0.960971
1983	LURAP1	1.70982	3.14312	0.276533	0.0879807	-3.50667	0.0425737	0.65677
1984	C1orf192	1.47437	1.78484	1.1639	0.652104	-0.616826	0.883626	1
1985	C1orf194	0.404467	0.255868	0.553067	2.16153	1.11205	0.98878	1
1986	C1orf198	361.377	375.047	347.706	0.9271	-0.109203	0.429874	1
1987	C1orf200	0	0	0	NA	NA	NA	NA
1988	STPG1	87.4604	95.6671	79.2537	0.828432	-0.271545	0.167049	0.97709
1989	C1orf21	0.227121	0	0.454242	Inf	Inf	0.711455	1
1990	C1orf210	14.7251	20.545	8.9053	0.433454	-1.20605	0.00607896	0.249362
1991	C1orf220	11.9267	11.5474	12.3061	1.0657	0.0918052	0.929395	1
1992	C1orf226	417.561	438.737	396.385	0.903468	-0.146454	0.298535	1
1993	C1orf227	0.243709	0.487419	0	0	#NAME?	0.718888	1
1994	C1orf228	1.2014	1.63317	0.769629	0.471248	-1.08544	0.578334	1
1995	C1orf229	47.6115	47.0559	48.167	1.02361	0.033669	0.805837	1
1996	C1orf27	28.1866	28.8566	27.5166	0.953566	-0.0685952	0.765511	1
1997	COA6	35.4536	37.3455	33.5618	0.898684	-0.154114	0.671	1
1998	C1orf35	99.6946	94.21	105.179	1.11643	0.158896	0.31045	1
1999	THEMIS2	4.58797	5.96551	3.21043	0.538165	-0.893879	0.324521	1
[truncated: 18,811 more rows]

## Sheet: 4x4 downreg. genes
	id	baseMean	baseMeanA	baseMeanB	foldChange	log2FoldChange	pval	padj
15170	SEMA5B	3.0833	5.88125	0.285356	0.0485196	-4.36529	0.000970001	0.0817463
8791	LAIR1	4.79754	8.92427	0.670805	0.0751664	-3.73377	0.000147638	0.0198737
8564	KLHL35	6.13646	10.8414	1.43152	0.132042	-2.92093	0.000238965	0.0285297
17529	TNFRSF9	12.3388	21.5992	3.07843	0.142525	-2.81071	4.24478e-07	0.000152034
5604	FAM22D	6.66812	11.6616	1.67464	0.143603	-2.79984	0.00025866	0.0304581
1125	ATP10A	7.91799	13.7172	2.11879	0.154463	-2.69467	3.61509e-05	0.00690562
3455	CLEC10A	6.90587	11.9184	1.89332	0.158856	-2.65421	0.000108864	0.0161344
12551	PARP6	8.7148	15.0343	2.39533	0.159324	-2.64996	3.38897e-05	0.00654642
8079	ITGAM	9.41731	16.2038	2.6308	0.162357	-2.62276	2.76549e-05	0.00566003
1139	ATP1A3	7.55743	13.0002	2.11462	0.16266	-2.62007	0.000110442	0.0162283
541	ALLC	6.59242	10.9149	2.26994	0.207967	-2.26557	0.00119998	0.0937728
17511	TNFRSF10C	9.27446	15.3528	3.19616	0.208182	-2.26408	0.000142417	0.0196912
15764	SLC45A2	7.45935	12.3123	2.60645	0.211695	-2.23994	0.000721917	0.0665852
4995	EID1	14.7301	23.8965	5.56366	0.232823	-2.10269	6.49376e-06	0.00164177
19658	MAK	8.95384	14.525	3.38269	0.232888	-2.10229	0.000729577	0.0667175
4886	EBI3	8.33169	13.4727	3.19072	0.236829	-2.07808	0.000784197	0.0702183
17500	TNF	36.6445	59.1823	14.1068	0.238363	-2.06877	6.42866e-12	8.50166e-09
11299	NCF2	11.9525	19.2609	4.64415	0.241118	-2.05219	3.18046e-05	0.00621347
14006	RAB25	9.08202	14.5237	3.64031	0.250646	-1.99628	0.000429175	0.044448
16121	SORCS2	19.951	31.8566	8.04534	0.252549	-1.98537	3.57606e-07	0.000133651
513	ALDH8A1	10.4998	16.6717	4.32797	0.259599	-1.94564	0.000353394	0.0384529
6481	GEM	11.8097	18.6009	5.01857	0.269802	-1.89002	0.000389439	0.0418452
17737	TRIM31	24.6883	38.8283	10.5484	0.271668	-1.88008	1.57564e-08	1.04186e-05
19873	EGOT	25.4469	39.7174	11.1765	0.281401	-1.8293	3.9661e-07	0.000145075
20027	KLRC3	31.5171	49.1476	13.8867	0.282551	-1.82342	6.18274e-09	4.4289e-06
17553	TNNT2	11.6415	18.1458	5.13725	0.28311	-1.82057	0.000422926	0.0441994
7783	IGFL4	14.965	22.8049	7.12512	0.312438	-1.67836	0.00020616	0.0256834
14220	RBM23	123.523	188.189	58.8567	0.312754	-1.6769	1.9991e-18	1.14562e-14
11984	OR10H2	10.2193	15.5669	4.87165	0.31295	-1.676	0.000960974	0.0816428
19529	ZSCAN4	126.806	192.28	61.3325	0.318975	-1.64848	8.0272e-18	3.45009e-14
14321	REM2	12.5242	18.9039	6.14446	0.325036	-1.62133	0.00100875	0.0841865
6137	FOSB	131.018	196.486	65.5511	0.333618	-1.58373	4.86299e-16	1.39341e-12
4057	CXCL2	43.4948	65.1952	21.7945	0.334296	-1.5808	3.36553e-09	2.86786e-06
12690	PDE2A	17.547	26.2375	8.85645	0.33755	-1.56683	9.54959e-05	0.0149912
8263	KCNK5	19.2647	28.7204	9.80895	0.341533	-1.5499	8.40777e-05	0.0137663
14255	RBP2	29.5093	43.7999	15.2187	0.34746	-1.52508	1.85491e-06	0.000549822
5479	FAM151A	17.6554	26.2034	9.10726	0.34756	-1.52467	8.57461e-05	0.0138771
14573	RNF186	24.1962	35.8591	12.5333	0.349516	-1.51657	2.64587e-05	0.00548046
18032	TUSC3	18.7672	27.6496	9.88487	0.357505	-1.48396	0.000138597	0.0195308
12848	PGLYRP2	37.6747	55.0908	20.2587	0.367733	-1.44327	2.36276e-07	9.23195e-05
19766	NOP14-AS1	28.7915	41.9472	15.6358	0.372749	-1.42372	7.03802e-06	0.00172854
1630	C10orf55	19.8862	28.9369	10.8356	0.374456	-1.41713	0.000321216	0.0353996
12696	PDE4D	49.9422	72.1779	27.7065	0.383865	-1.38133	6.11443e-08	3.00341e-05
10138	LYVE1	77.3762	111.698	43.0548	0.385458	-1.37535	4.35348e-10	4.67781e-07
15419	SIGIRR	29.3798	42.2003	16.5594	0.392399	-1.34961	4.54559e-05	0.00831359
2621	CASS4	21.9069	31.3518	12.462	0.39749	-1.33101	0.000122602	0.0175648
6281	FYN	27.5241	39.3008	15.7475	0.40069	-1.31944	9.59186e-05	0.0149912
6336	GADD45B	532.584	759.646	305.521	0.402189	-1.31406	5.81868e-21	5.00174e-17
14781	RRAD	82.3071	117.16	47.4542	0.405038	-1.30387	3.50308e-09	2.86786e-06
8869	LCN2	30.9456	43.9129	17.9784	0.40941	-1.28838	5.05804e-05	0.00915346
16184	SPARC	949.915	1347.64	552.188	0.409744	-1.28721	4.66072e-21	5.00174e-17
3866	CRYAB	71.6681	101.633	41.7027	0.410325	-1.28516	1.73379e-08	1.10398e-05
17883	TSPAN7	234.404	332.204	136.604	0.411204	-1.28208	8.35556e-15	1.79561e-11
7149	HCAR3	36.6051	51.8187	21.3915	0.412813	-1.27644	6.30116e-06	0.00161686
6398	GAS7	45.7093	64.5943	26.8243	0.415273	-1.26787	1.57008e-06	0.000473557
15721	SLC37A2	73.7854	104.124	43.4469	0.417261	-1.26098	2.13994e-08	1.26862e-05
7531	HRG	20.9126	29.3864	12.4387	0.423281	-1.24031	0.000503403	0.0497385
8593	KLRC2	27.7748	38.8076	16.742	0.431411	-1.21287	0.000267291	0.0310491
15139	SECTM1	49.4226	68.8083	30.0369	0.43653	-1.19585	1.93153e-06	0.000562828
3618	COBL	60.73	84.309	37.151	0.440652	-1.18229	4.6099e-07	0.000161742
4828	DUSP4	29.2418	40.5418	17.9417	0.442549	-1.17609	0.000315491	0.0349931
18180	UCA1	26.804	37.1607	16.4473	0.442599	-1.17593	0.000520992	0.0503196
16760	TANK	35.3166	48.7613	21.8719	0.44855	-1.15666	9.94487e-05	0.0154029
6136	FOS	109.025	150.506	67.5441	0.44878	-1.15592	3.30429e-08	1.8325e-05
1252	AXL	26.0217	35.8473	16.1962	0.451811	-1.14621	0.001185	0.0934522
4131	CYP1A1	380.462	522.561	238.363	0.456145	-1.13244	1.4064e-15	3.45411e-12
4566	DLX2	35.8105	49.1633	22.4578	0.4568	-1.13036	5.69877e-05	0.0102055
13063	PLA2G4C	51.048	69.9873	32.1087	0.458779	-1.12413	1.00701e-05	0.00233953
17503	TNFAIP3	987.749	1350.46	625.037	0.462832	-1.11144	1.91044e-16	6.56886e-13
20438	NEURL3	33.8495	46.1851	21.5138	0.465818	-1.10216	0.000115442	0.0168193
2459	CAB39L	96.6256	130.703	62.5478	0.478547	-1.06327	9.88701e-08	4.29215e-05
15462	SIX4	139.991	189.248	90.7348	0.47945	-1.06055	4.46896e-09	3.46928e-06
15778	SLC4A3	110.787	149.638	71.9365	0.480738	-1.05668	9.67315e-08	4.29215e-05
4727	DPP4	802.759	1082.65	522.865	0.482948	-1.05006	1.4452e-14	2.76066e-11
14524	RND1	48.8426	65.8578	31.8274	0.483275	-1.04908	6.4462e-05	0.0111942
2010	C1orf63	51.9412	69.9756	33.9068	0.484553	-1.04527	4.0364e-05	0.0076257
735	AOC2	42.4475	57.0481	27.847	0.488132	-1.03466	0.000280683	0.0319116
3045	CDH16	400.909	537.28	264.537	0.492364	-1.0222	6.99498e-12	8.58983e-09
2994	CDA	132.089	176.399	87.7799	0.497621	-1.00688	5.63092e-08	2.84726e-05
1377	BCL3	74.544	99.3025	49.7856	0.501352	-0.996103	5.15363e-06	0.00138439
17069	THAP2	76.781	102.206	51.3556	0.50247	-0.992892	1.18609e-05	0.00261426
8820	LAPTM5	38.0454	50.5024	25.5884	0.506676	-0.980863	0.000514596	0.0501675
3997	CTRL	38.6812	50.8144	26.548	0.52245	-0.936636	0.00056782	0.0542331
474	AKR1B1	2503.58	3288.74	1718.42	0.522516	-0.936452	3.84877e-14	6.61681e-11
19919	FLJ43663	98.705	129.523	67.8868	0.524129	-0.932007	8.10989e-06	0.00190993
7502	HP	142.353	186.588	98.1187	0.525859	-0.927253	6.64627e-08	3.17396e-05
2745	CCDC28B	65.726	86.0467	45.4053	0.527682	-0.922259	6.80957e-05	0.011707
4200	DAB2	65.2293	85.3458	45.1127	0.528588	-0.919786	4.42837e-05	0.00827528
11458	NFKBIA	4537.74	5845.41	3230.07	0.552583	-0.855738	5.09764e-12	7.30322e-09
15293	SFRP5	64.869	83.4701	46.2678	0.554304	-0.85125	0.000188854	0.0242297
5069	ELF5	51.0096	65.5165	36.5026	0.557151	-0.84386	0.000424203	0.0441994
6901	GRAMD3	75.6888	97.059	54.3187	0.559647	-0.837412	0.00013257	0.0188359
15446	SIRPA	175.239	223.11	127.369	0.570882	-0.808736	1.99031e-06	0.00057029
412	AGXT2L1	126.67	161.042	92.297	0.573123	-0.803082	5.45036e-06	0.00144158
11792	NUAK2	61.2061	77.6299	44.7823	0.576869	-0.793684	0.000266755	0.0310491
15775	SLC4A11	1760.57	2230.19	1290.94	0.578848	-0.788743	7.6032e-10	7.2619e-07
6853	GPR56	387.673	490.619	284.727	0.580342	-0.785024	9.9864e-08	4.29215e-05
10966	MT1X	818.968	1033.61	604.324	0.584672	-0.7743	2.49435e-10	2.85885e-07
2906	CD109	131.184	165.025	97.3435	0.589872	-0.761526	3.08096e-05	0.00608826
4810	DUSP1	1416.34	1777.26	1055.42	0.593847	-0.751836	3.07152e-08	1.76019e-05
15825	SLC7A5P1	68.3602	85.645	51.0753	0.596361	-0.745743	0.000849113	0.0741012
17793	TRIT1	62.4367	78.2142	46.6593	0.596558	-0.745267	0.00119485	0.0937728
1088	ATF3	254.968	319.258	190.679	0.597256	-0.74358	7.6436e-06	0.00182512
8161	JUNB	838.126	1047.14	629.109	0.600786	-0.735076	8.24088e-08	3.82911e-05
475	AKR1B10	5899.3	7365.11	4433.48	0.601956	-0.73227	6.93328e-10	7.01159e-07
4163	CYP3A7	139.636	174.129	105.143	0.603822	-0.727805	2.91743e-05	0.00590076
3818	CREB3L3	117.139	146.053	88.2247	0.604061	-0.727234	8.63684e-05	0.0138771
14014	RAB31	103.736	129.126	78.3463	0.606744	-0.72084	0.000244847	0.0290304
11692	NR1D1	186.987	232.717	141.257	0.606991	-0.720254	1.05537e-05	0.00238736
3889	CSF1	444.627	552.704	336.551	0.608918	-0.71568	7.42e-07	0.000250127
9483	LOC146880	86.7225	107.795	65.65	0.609026	-0.715424	0.000674861	0.0637485
13430	PPP1R15A	749.104	929.257	568.95	0.612263	-0.707776	1.03707e-07	4.3486e-05
20436	NEAT1	3926.8	4864.95	2988.65	0.614322	-0.702934	3.14704e-07	0.000120231
18208	UGT2A3	625.458	768.844	482.072	0.627008	-0.673444	1.09149e-06	0.000360863
13082	PLAU	468.792	572.667	364.916	0.637222	-0.650133	7.14943e-06	0.00173117
43	ABCB1	269.287	328.335	210.239	0.640317	-0.643142	7.28969e-05	0.0124084
1272	B3GNT3	386.824	471.615	302.033	0.640421	-0.642907	6.5943e-06	0.00164303
12637	PCK1	135.679	165.096	106.262	0.643633	-0.635689	0.000282141	0.0319116
15799	SLC6A12	529.467	643.081	415.854	0.646659	-0.628924	1.03353e-05	0.00236913
18839	ZC3H12A	253.482	307.841	199.123	0.646837	-0.628526	0.000121273	0.0175204
15237	SERPINB9	169.672	205.785	133.558	0.64902	-0.623666	0.000284217	0.0319363
7360	HIVEP1	142.628	172.932	112.323	0.649523	-0.622547	0.000724257	0.0665852
19462	ZNF827	186.371	225.876	146.867	0.650211	-0.62102	0.000145193	0.0198107
3724	COTL1	135.785	164.502	107.068	0.650863	-0.619573	0.000740264	0.0673366
6446	GCLC	829.594	1004.98	654.206	0.650963	-0.619352	3.10641e-06	0.000847705
3063	CDHR2	192.41	232.802	152.019	0.652996	-0.614854	0.000184451	0.0238848
1853	HID1	856.887	1034.77	679.006	0.656192	-0.60781	2.81904e-06	0.000794507
15790	SLC5A3	1703.53	2055.69	1351.38	0.657384	-0.605192	1.15422e-06	0.000367468
7418	HMOX1	477.581	576.032	379.13	0.658175	-0.603456	1.85984e-05	0.00394746
7698	IER5	414.585	499.332	329.838	0.660559	-0.598241	6.11296e-05	0.0107239
12372	OSGIN1	170.575	205.424	135.725	0.660709	-0.597914	0.000190577	0.0242696
6907	GRB10	284.294	341.833	226.755	0.663349	-0.592159	7.55422e-05	0.0127326
4980	EGR1	1471.9	1766.99	1176.81	0.665996	-0.586415	1.24448e-05	0.00270823
1100	ATG16L1	373.793	448.542	299.043	0.666701	-0.584889	9.21036e-05	0.0146615
736	AOC3	213.361	255.814	170.909	0.668097	-0.58187	0.000498444	0.0495332
5175	EPC1	253.705	303.046	204.364	0.674366	-0.568395	0.000286277	0.0319589
9081	LIPC	521.099	622.084	420.115	0.675335	-0.566325	0.00010061	0.015418
5067	ELF3	253.784	302.465	205.103	0.678104	-0.560422	0.000349442	0.038265
20420	MT1JP	181.513	216.052	146.973	0.680269	-0.555823	0.000163277	0.0214279
14313	REL	276.934	329.338	224.53	0.68176	-0.552664	0.000224596	0.027192
4829	DUSP5	214.283	254.807	173.759	0.681925	-0.552315	0.000197681	0.0248067
7817	IL11	190.921	226.438	155.403	0.686294	-0.543101	0.000531628	0.0510601
7900	IL8	408.18	483.414	332.945	0.688736	-0.537977	0.000232997	0.0280118
19826	CYP21A1P	192.814	228.245	157.383	0.689533	-0.536308	0.00106114	0.0864606
13156	PLK2	308.663	364.299	253.026	0.694556	-0.525837	0.000446258	0.045667
10960	MT1F	568.185	669.148	467.222	0.698235	-0.518215	8.00866e-05	0.0133675
15893	SMAD7	210.322	247.59	173.055	0.698958	-0.516722	0.000516499	0.0501675
10959	MT1E	3044.87	3575.97	2513.77	0.702961	-0.508483	5.68727e-06	0.00148145
17040	TGFA	334.051	392.294	275.808	0.703067	-0.508267	0.000700017	0.0656506
455	AKAP12	434.665	509.282	360.049	0.706974	-0.500271	0.000143171	0.0196912
11165	MYOM3	431.228	504.955	357.5	0.707985	-0.49821	0.000276593	0.0317013
5163	EP300	423.855	495.937	351.772	0.709309	-0.495515	0.000407135	0.0432066
11069	MXD1	354.082	413.548	294.616	0.712411	-0.489218	0.00082415	0.0726604
4505	DIDO1	984.718	1149.19	820.248	0.713764	-0.486481	0.000422141	0.0441994
3385	CIDEB	1180.18	1376.75	983.604	0.714437	-0.485122	0.000148693	0.0198737
7668	ICAM1	1029.01	1198.66	859.361	0.716936	-0.480083	5.79261e-05	0.0102667
14486	RIPK4	314.243	364.584	263.903	0.723846	-0.466245	0.000964023	0.0816428
15255	SESN2	648.758	751.459	546.056	0.726661	-0.460645	0.000747769	0.0676613
1176	ATP6V0A1	682.332	784.237	580.428	0.740118	-0.434174	0.00114347	0.0910114
4976	EGFR	891.411	1019.04	763.783	0.749514	-0.415973	0.000990276	0.0830479
10967	MT2A	29726.9	33976.3	25477.4	0.749859	-0.415309	0.000208035	0.0257305

## Sheet: 4x4 upregulated genes
	id	baseMean	baseMeanA	baseMeanB	foldChange	log2FoldChange	pval	padj
14342	REXO1L1	3.67668	0.203234	7.15013	35.1819	5.13676	0.000108658	0.0161344
20268	LOC349196	9.16105	1.42093	16.9012	11.8945	3.57222	3.43901e-08	1.84761e-05
14991	SCARA3	15.2998	7.54966	23.0499	3.0531	1.61028	0.000184776	0.0238848
15545	SLC19A3	50.2255	25.737	74.7141	2.90299	1.53754	8.67834e-09	5.96792e-06
16008	SNORA53	107.035	59.0882	154.982	2.6229	1.39116	1.88307e-13	2.94306e-10
15156	SEMA3A	16.6822	9.29504	24.0693	2.58948	1.37266	0.000841739	0.0738325
2	A1BG	182.021	120.24	243.802	2.02763	1.01979	3.28727e-09	2.86786e-06
18210	UGT2B11	38.004	27.3749	48.6332	1.77656	0.829088	0.00116117	0.0919949
7310	HIST1H2AL	76.0437	55.0046	97.0829	1.765	0.819665	0.00010134	0.015418
16519	STMN3	113.124	82.8207	143.428	1.73178	0.792259	2.61713e-05	0.00548046
12660	PCSK9	441.417	324.222	558.612	1.72293	0.784862	1.8595e-08	1.14173e-05
5090	ELOVL6	225.394	165.889	284.899	1.7174	0.78023	5.3835e-07	0.000185106
3244	CFD	65.5747	48.3569	82.7925	1.71211	0.775778	0.00081296	0.0722718
7296	HIST1H1B	99.6695	74.3046	125.034	1.68273	0.7508	8.14371e-05	0.0134622
7709	IFI6	935.645	699.085	1172.2	1.67677	0.745683	4.64131e-09	3.46928e-06
2129	TEX37	89.5952	67.7114	111.479	1.64638	0.719302	0.000926407	0.0792378
8038	IRX3	67.0734	51.0072	83.1396	1.62996	0.704833	0.000702636	0.0656506
11946	ONECUT1	119.736	92.2998	147.172	1.5945	0.673101	0.000219747	0.0267935
7307	HIST1H2AH	752.022	582.978	921.067	1.57993	0.659864	1.11659e-06	0.000362197
5950	FGL1	1326.01	1029.49	1622.53	1.57606	0.656322	1.45815e-07	5.9687e-05
4559	DLK1	2575.88	2036.69	3115.08	1.52948	0.613044	1.20644e-06	0.000377113
13056	PLA2G2A	2442.12	1931.65	2952.59	1.52853	0.612145	5.28433e-08	2.75297e-05
4537	DKK1	4646.06	3695.72	5596.4	1.51429	0.598641	1.47163e-06	0.00045179
5374	FABP1	2626.87	2099.25	3154.49	1.50267	0.58753	3.03543e-06	0.000841695
6287	FZD4	607.576	486.911	728.242	1.49564	0.580759	1.44147e-05	0.00309771
13255	POLD3	145.211	117.052	173.369	1.48113	0.566696	0.00091733	0.0788537
3272	CHAF1B	145.271	117.46	173.083	1.47354	0.55929	0.00128951	0.0994141
20050	LINC00261	310.079	251.196	368.962	1.46882	0.55466	0.000149122	0.0198737
13029	PKDCC	216.582	175.497	257.666	1.4682	0.554053	0.000902476	0.0779667
10139	LYZ	89810.3	73614.3	106006	1.44003	0.526094	1.16406e-05	0.00259903
17033	TFPI	9671.74	7978.07	11365.4	1.42458	0.51054	2.99234e-05	0.00598189
7085	H2AFX	1583.41	1307.33	1859.5	1.42237	0.508295	4.53708e-05	0.00831359
17550	TNNI2	408.18	337.299	479.062	1.42029	0.506186	0.000632117	0.0600406
16173	SPAG5	448.978	372.161	525.795	1.41282	0.498576	0.000474965	0.0483172
17583	TOMM6	1783.2	1487.49	2078.91	1.3976	0.482949	0.000213865	0.0262626
10928	MSH2	434.678	364.509	504.848	1.38501	0.469897	0.000815538	0.0722718
18209	UGT2B10	399.412	335.068	463.757	1.38407	0.468916	0.000194081	0.0245342
744	AP1M2	295.573	248.08	343.066	1.38288	0.46768	0.00104879	0.0861281
4558	DLGAP5	476.225	399.748	552.703	1.38263	0.467414	0.000490936	0.0490707
1044	ASF1B	244.639	205.494	283.783	1.38098	0.465694	0.000718016	0.0665852
799	APOC1	1277.37	1074.08	1480.66	1.37853	0.463129	0.000162172	0.0214279
18502	VWA1	467.867	393.689	542.045	1.37683	0.461356	0.00109695	0.0881253
7299	HIST1H1E	4671.02	3931.34	5410.7	1.3763	0.460796	0.000271986	0.0313824
7306	HIST1H2AG	1285.57	1084.92	1486.21	1.36988	0.454045	0.00049055	0.0490707
346	ADRA2C	1054.05	889.674	1218.43	1.36953	0.45368	0.000490796	0.0490707
10346	MATN3	1248.34	1057.39	1439.29	1.36116	0.444841	0.000105857	0.015964
5882	FDPS	2560.9	2173.68	2948.12	1.35628	0.439657	0.000388692	0.0418452
1599	C10orf10	782.364	665.398	899.329	1.35157	0.434632	0.00107097	0.0868494
15977	SND1	1376.27	1173.49	1579.05	1.3456	0.428245	0.0010774	0.0869612
18488	VSNL1	2803.39	2394.92	3211.87	1.34112	0.423438	0.000433178	0.044594
14692	RPL32	11192.6	9566.68	12818.5	1.33991	0.422139	0.00114317	0.0910114
6234	FST	667.219	571.928	762.51	1.33323	0.414921	0.00104533	0.0861281
10406	MCM4	1134.2	975.78	1292.62	1.32471	0.405675	0.00121298	0.0943603
565	ALYREF	2066.13	1777.64	2354.61	1.32457	0.405527	0.00127556	0.0987813
11902	ODAM	2776.43	2404.36	3148.49	1.30949	0.389009	0.00101486	0.0842875
12771	PEG10	6901.55	6094.45	7708.65	1.26486	0.338983	0.00105205	0.0861281
